# Supplementary material
Source: PubMed Central journal article supplement (PMC2914495)
Supplement: NIHMS219120-supplement-5_si_005.pdf [file NIHMS219120-supplement-5_si_005.pdf]

**Supporting Information**  
*Journal of Organic Chemistry*

“Synthesis and conformational analysis of bicyclic extended dipeptide surrogates.”

Sujeewa Ranatunga, Wathsala Liyanage, and Juan R. Del Valle\*  
*Drug Discovery Department, H. Lee Moffitt Cancer Center and Research Institute*

**CONTENTS** (47 pages)

|                                                                                       |            |
|---------------------------------------------------------------------------------------|------------|
| <sup>1</sup> H and <sup>13</sup> C NMR spectra for compound <b>5</b>                  | <b>S2</b>  |
| <sup>1</sup> H and <sup>13</sup> C NMR spectra for compound <b>6a</b>                 | <b>S3</b>  |
| <sup>1</sup> H and <sup>13</sup> C NMR spectra for compound <b>6b</b>                 | <b>S4</b>  |
| <sup>1</sup> H and <sup>13</sup> C NMR spectra for compound <b>6c</b>                 | <b>S5</b>  |
| <sup>1</sup> H and <sup>13</sup> C NMR spectra for compound <b>7</b>                  | <b>S6</b>  |
| <sup>1</sup> H and <sup>13</sup> C NMR spectra for compound <b>8</b>                  | <b>S7</b>  |
| <sup>1</sup> H and <sup>13</sup> C NMR spectra for compound <b>9</b>                  | <b>S8</b>  |
| <sup>1</sup> H and <sup>13</sup> C NMR spectra for product of hydrolysis of <b>9</b>  | <b>S9</b>  |
| <sup>1</sup> H and <sup>13</sup> C NMR spectra for compound <b>10</b>                 | <b>S10</b> |
| <sup>1</sup> H and <sup>13</sup> C NMR spectra for compound <b>11</b>                 | <b>S11</b> |
| <sup>1</sup> H and <sup>13</sup> C NMR spectra for compound <b>12</b>                 | <b>S12</b> |
| <sup>1</sup> H and <sup>13</sup> C NMR spectra for compound <b>13</b>                 | <b>S13</b> |
| <sup>1</sup> H and <sup>13</sup> C NMR spectra for compound <b>14a</b>                | <b>S14</b> |
| <sup>1</sup> H and <sup>13</sup> C NMR spectra for compound <b>14b</b>                | <b>S15</b> |
| <sup>1</sup> H and <sup>13</sup> C NMR spectra for compound <b>14c</b>                | <b>S16</b> |
| <sup>1</sup> H and <sup>13</sup> C NMR spectra for compound <b>15</b>                 | <b>S17</b> |
| <sup>1</sup> H and <sup>13</sup> C NMR spectra for compound <b>16</b>                 | <b>S18</b> |
| <sup>1</sup> H and <sup>13</sup> C NMR spectra for product of hydrolysis of <b>16</b> | <b>S19</b> |
| <sup>1</sup> H and <sup>13</sup> C NMR spectra for compound <b>17 minor</b>           | <b>S20</b> |
| <sup>1</sup> H and <sup>13</sup> C NMR spectra for compound <b>17 major</b>           | <b>S21</b> |
| <sup>1</sup> H and <sup>13</sup> C NMR spectra for compound <b>18</b>                 | <b>S22</b> |
| <sup>1</sup> H and <sup>13</sup> C NMR spectra for compound <b>19</b>                 | <b>S23</b> |
| <sup>1</sup> H and <sup>13</sup> C NMR spectra for product of oxidation of <b>19</b>  | <b>S24</b> |
| <sup>1</sup> H and <sup>13</sup> C NMR spectra for compound <b>20</b>                 | <b>S25</b> |
| <sup>1</sup> H and <sup>13</sup> C NMR spectra for compound <b>21</b>                 | <b>S26</b> |
| <sup>1</sup> H and <sup>13</sup> C NMR spectra for compound <b>22 minor</b>           | <b>S27</b> |
| <sup>1</sup> H and <sup>13</sup> C NMR spectra for compound <b>22 major</b>           | <b>S28</b> |
| <sup>1</sup> H and <sup>13</sup> C NMR spectra for compound <b>23</b>                 | <b>S29</b> |
| <sup>1</sup> H and <sup>13</sup> C NMR spectra for compound <b>24</b>                 | <b>S30</b> |
| <sup>1</sup> H and <sup>13</sup> C NMR spectra for product of oxidation of <b>24</b>  | <b>S31</b> |
| <sup>1</sup> H and <sup>13</sup> C NMR spectra for compound <b>25</b>                 | <b>S32</b> |
| <sup>1</sup> H and <sup>13</sup> C NMR spectra for compound <b>26</b>                 | <b>S33</b> |
| <sup>1</sup> H and <sup>13</sup> C NMR spectra for compound <b>28</b>                 | <b>S34</b> |
| <sup>1</sup> H and <sup>13</sup> C NMR spectra for compound <b>29</b>                 | <b>S35</b> |
| <sup>1</sup> H and <sup>13</sup> C NMR spectra for compound <b>30</b>                 | <b>S36</b> |
| <sup>1</sup> H and <sup>13</sup> C NMR spectra for compound <b>31</b>                 | <b>S37</b> |
| <sup>1</sup> H and <sup>13</sup> C NMR spectra for compound <b>32major</b>            | <b>S38</b> |
| <sup>1</sup> H and <sup>13</sup> C NMR spectra for compound <b>32 minor</b>           | <b>S39</b> |
| <sup>1</sup> H and <sup>13</sup> C NMR spectra for product of oxidation of <b>31</b>  | <b>S40</b> |
| <sup>1</sup> H and <sup>13</sup> C NMR spectra for compound <b>33</b>                 | <b>S41</b> |
| HPLC Trace for <b>29</b>                                                              | <b>S42</b> |
| HPLC Trace for <b>30</b>                                                              | <b>S43</b> |
| HPLC Trace for <b>31</b>                                                              | <b>S44</b> |
| HPLC Trace for <b>32</b>                                                              | <b>S45</b> |
| HPLC Trace for <b>33</b>                                                              | <b>S46</b> |
| Procedure for conformational searches                                                 | <b>S47</b> |

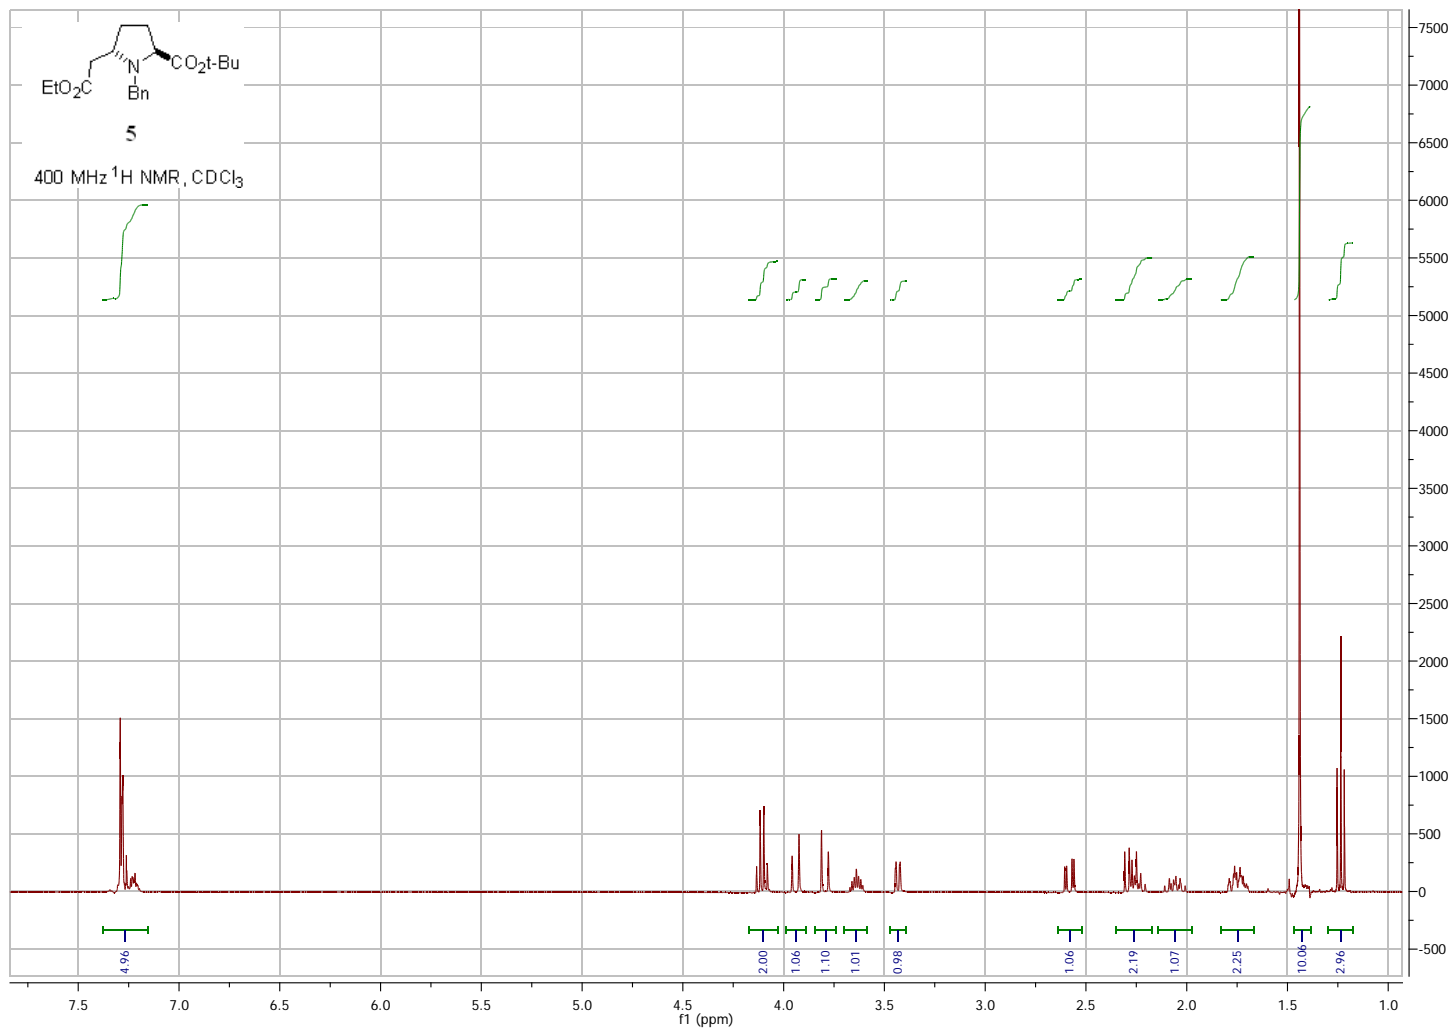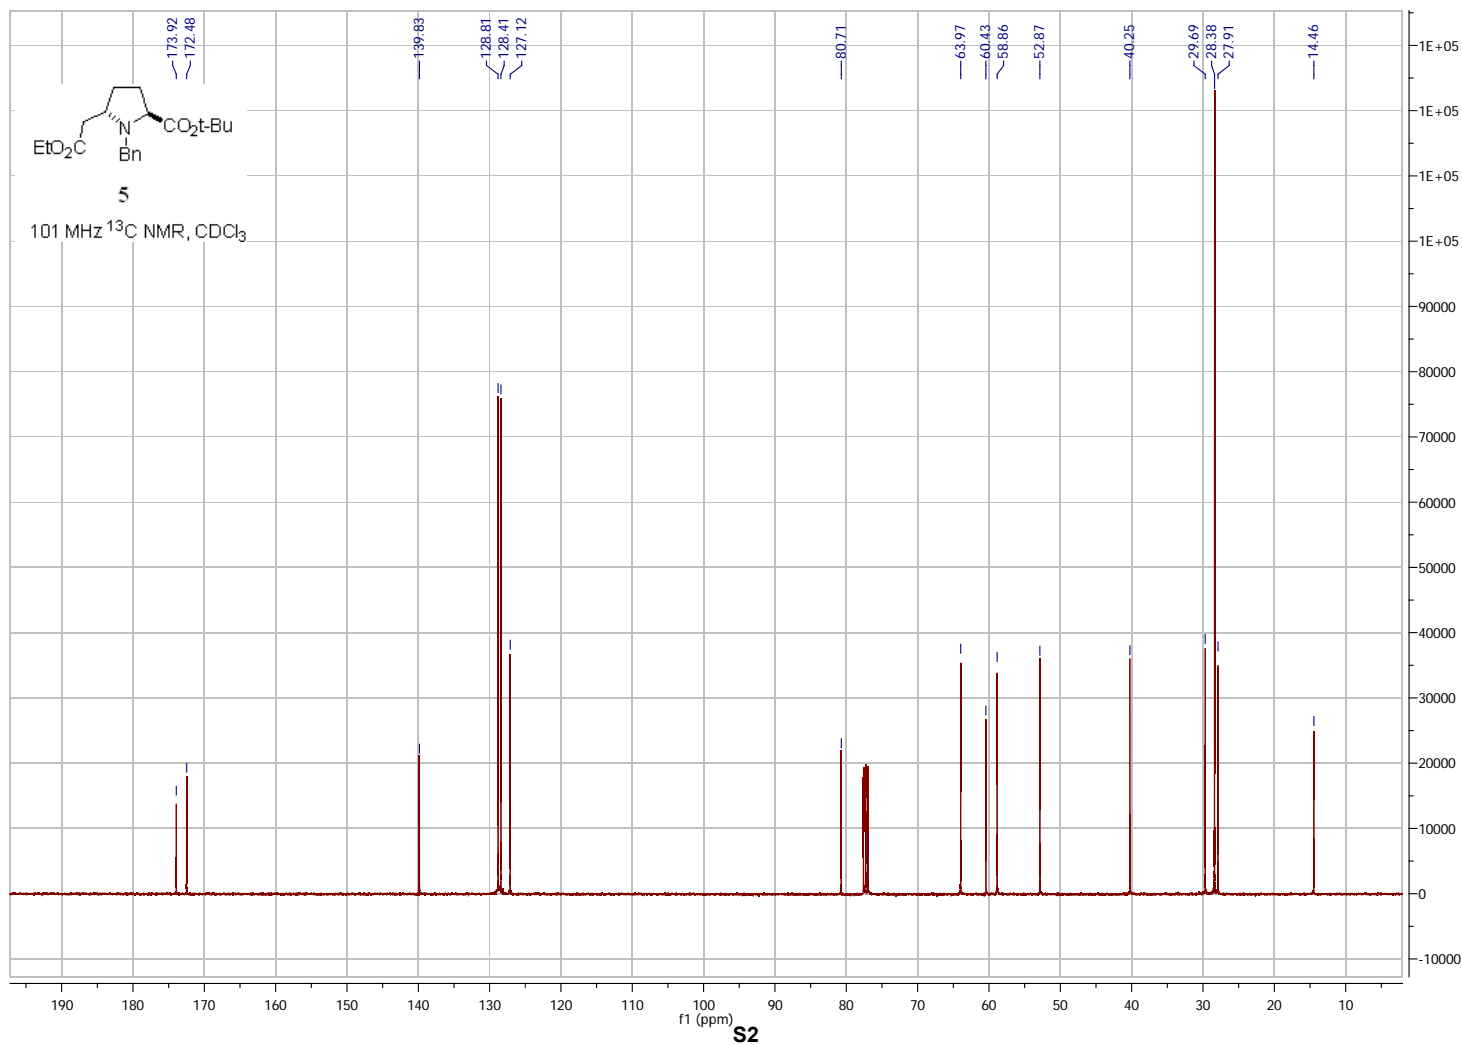

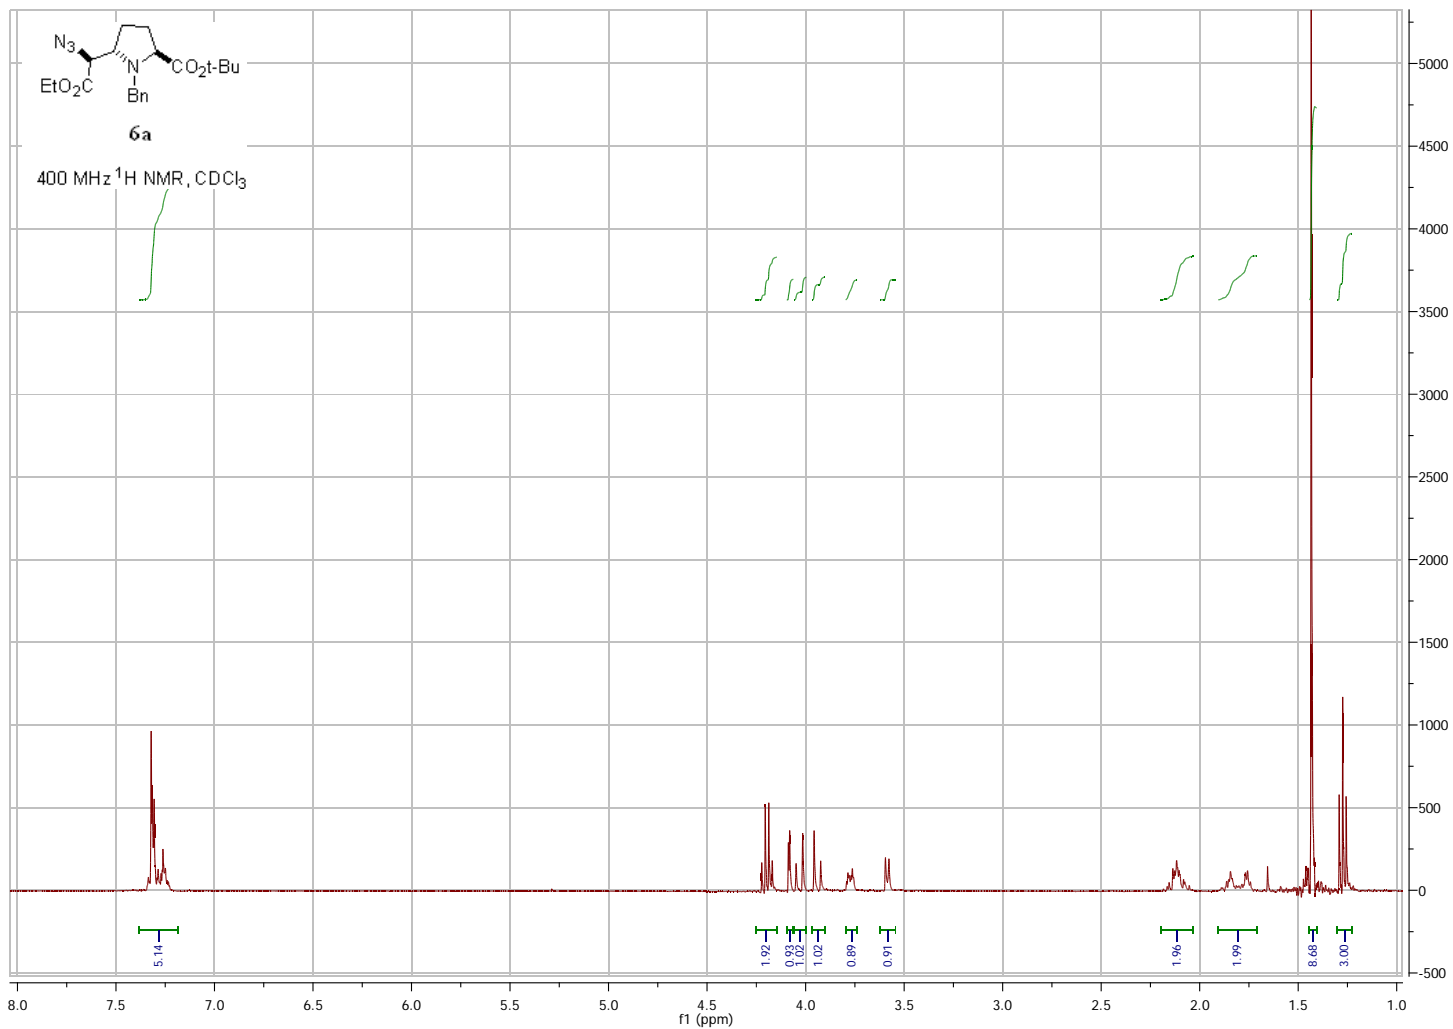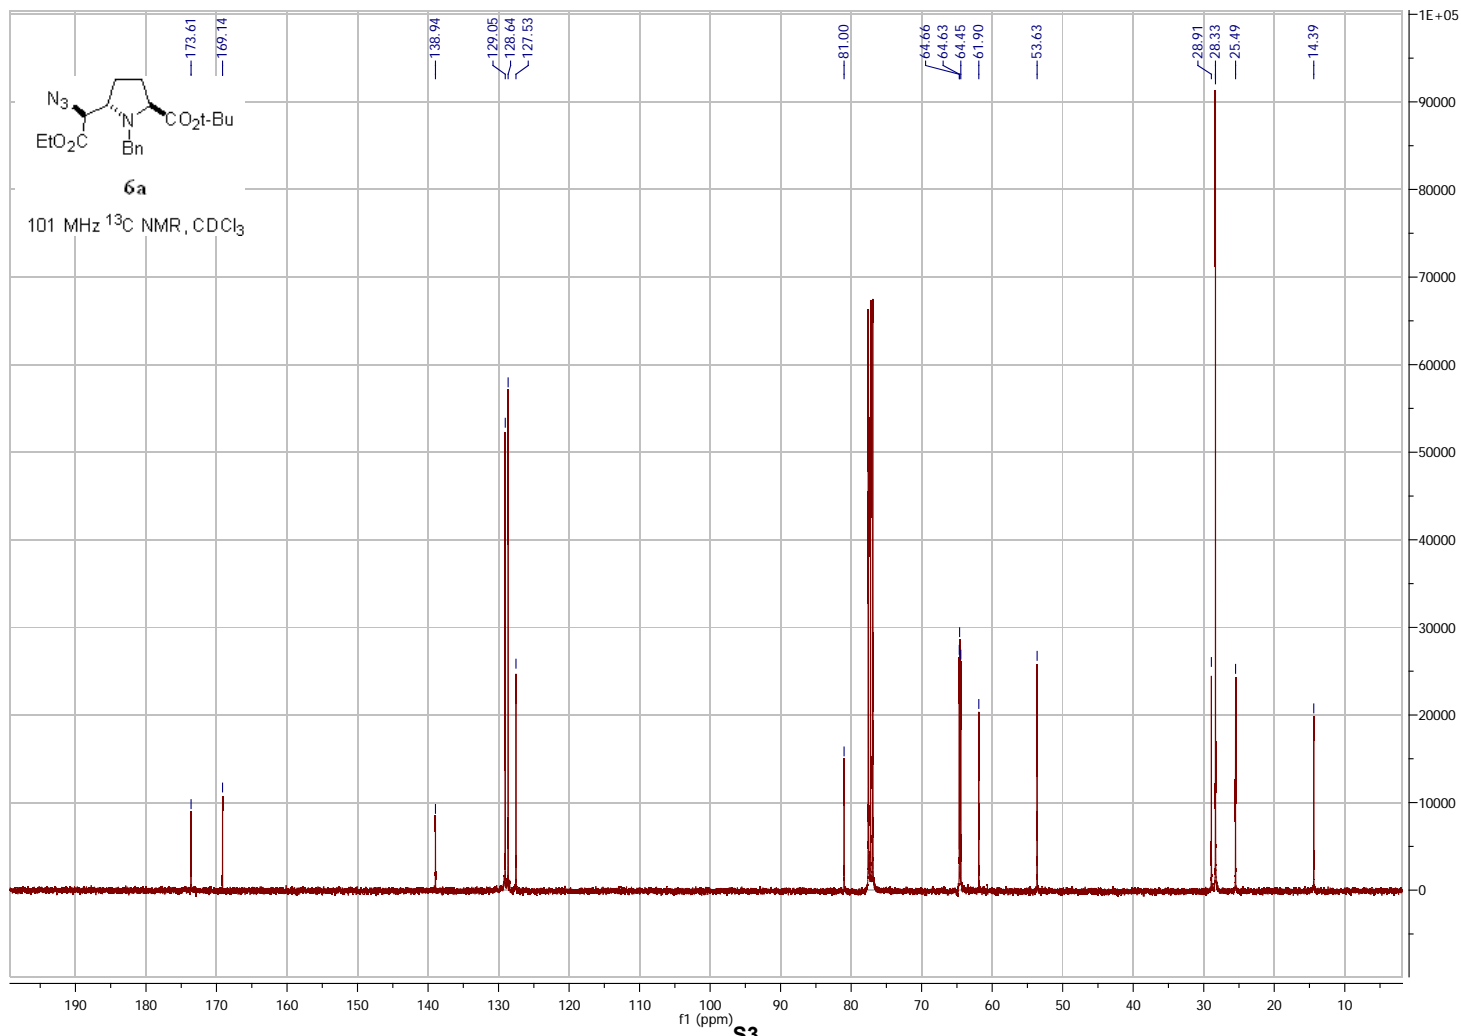

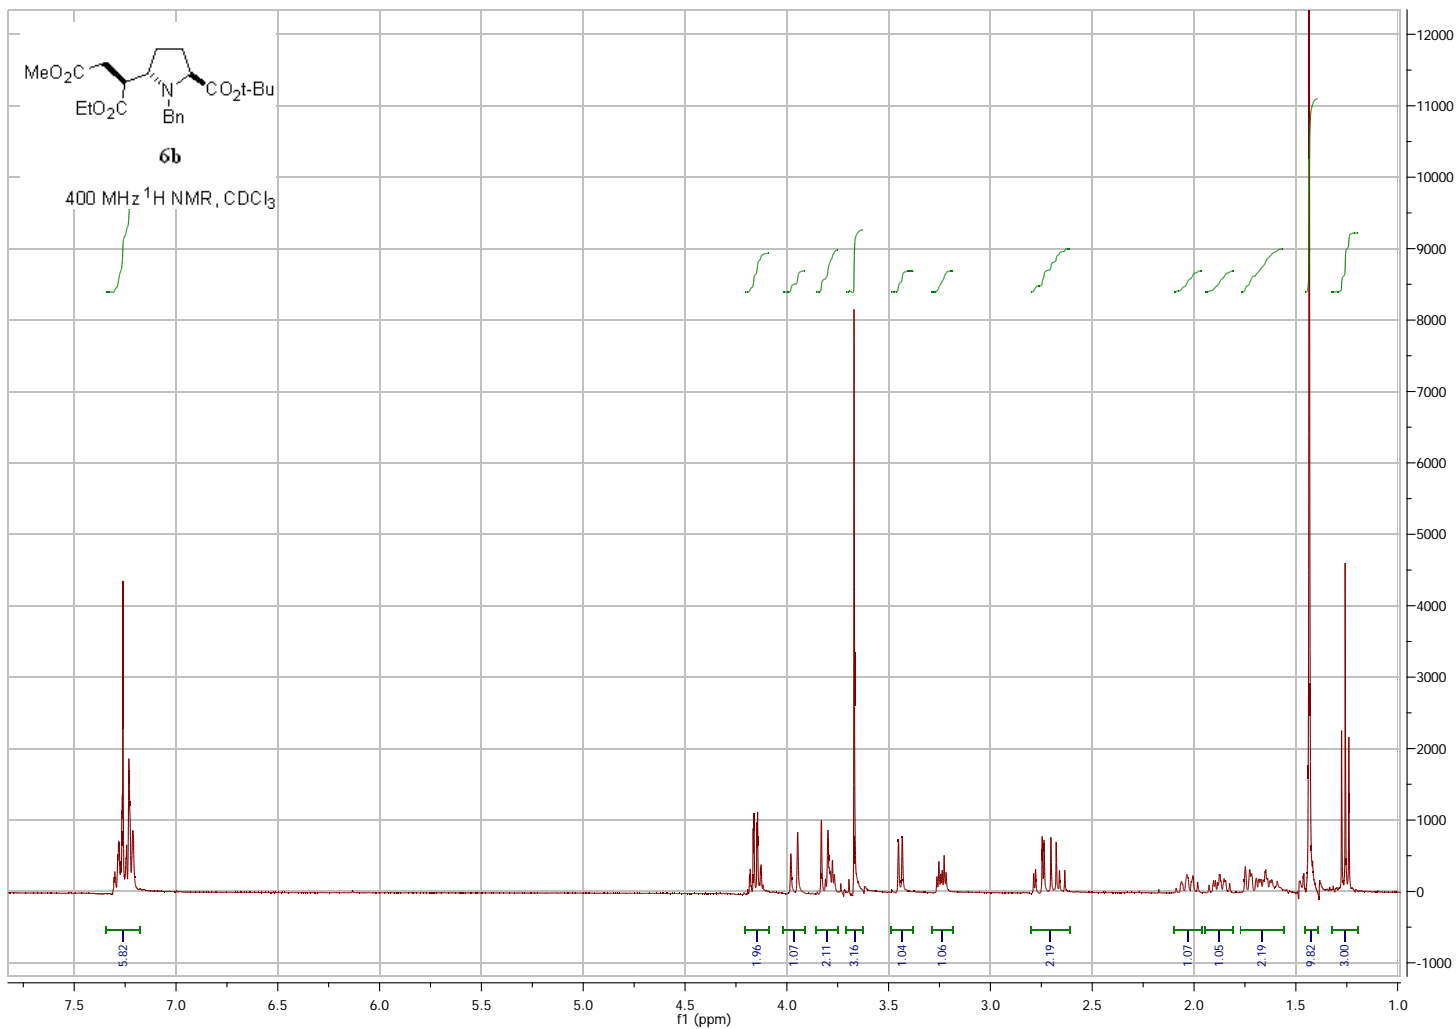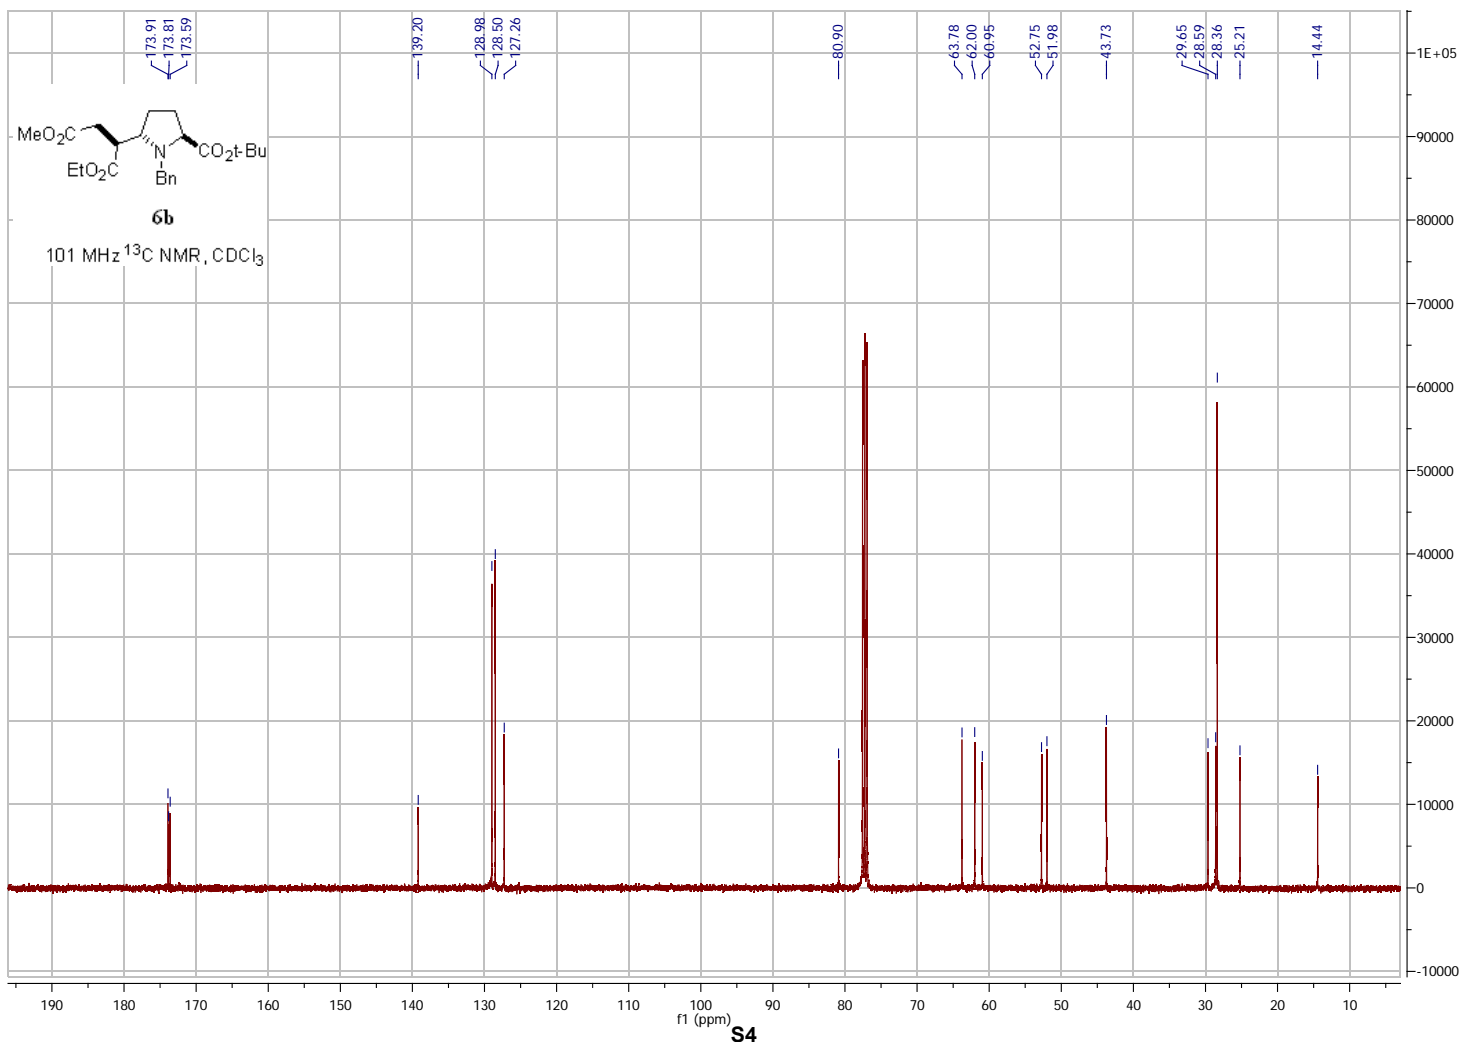



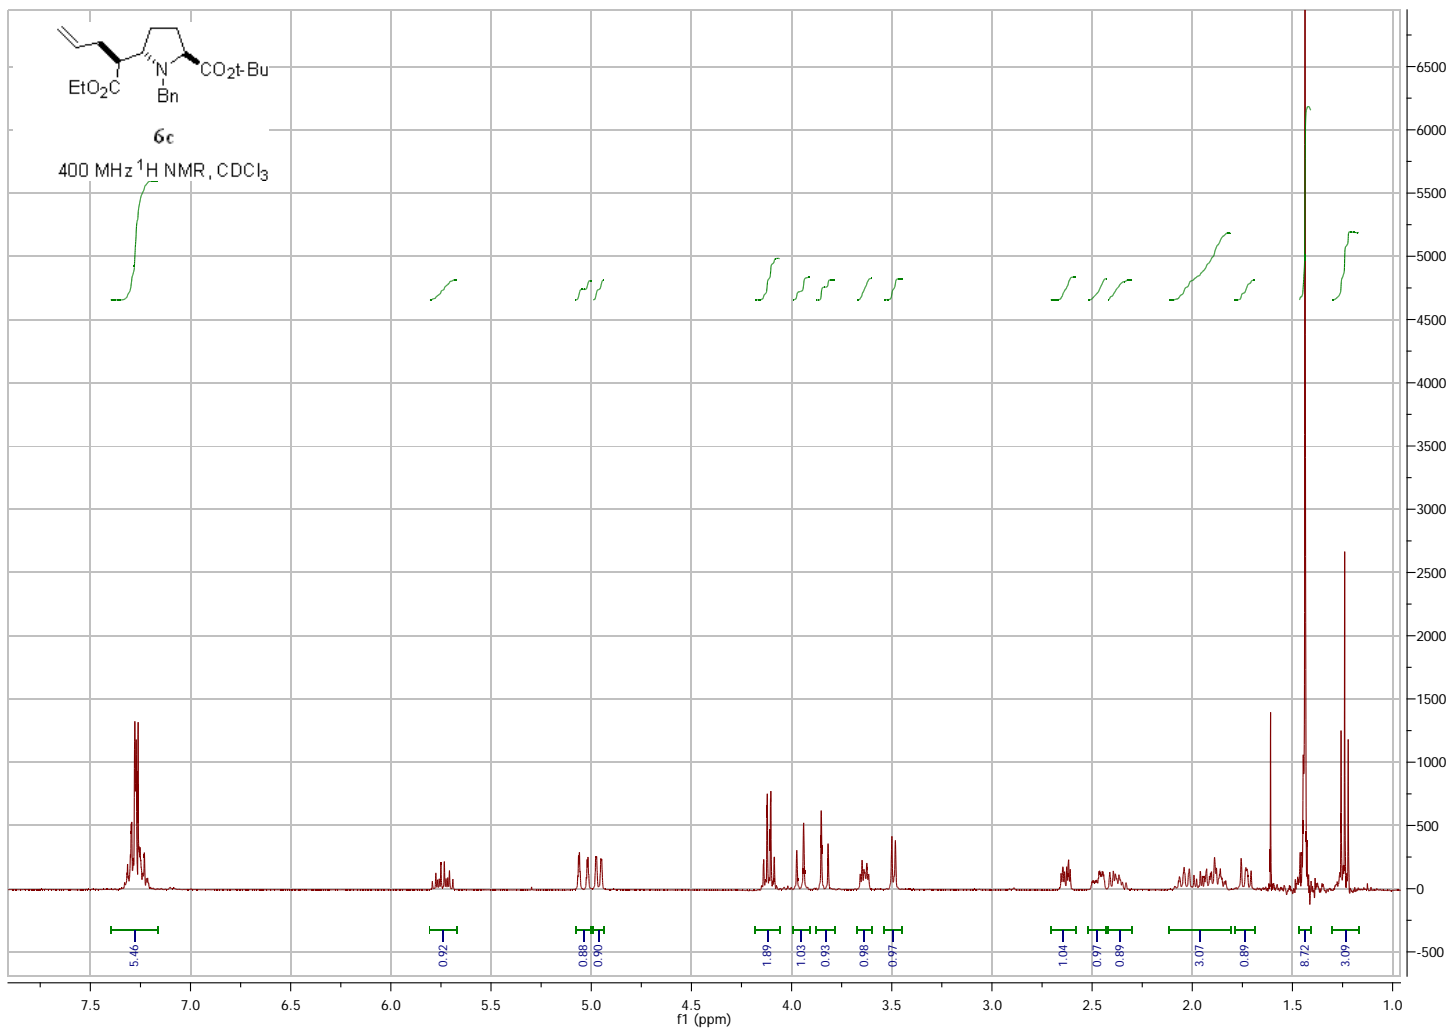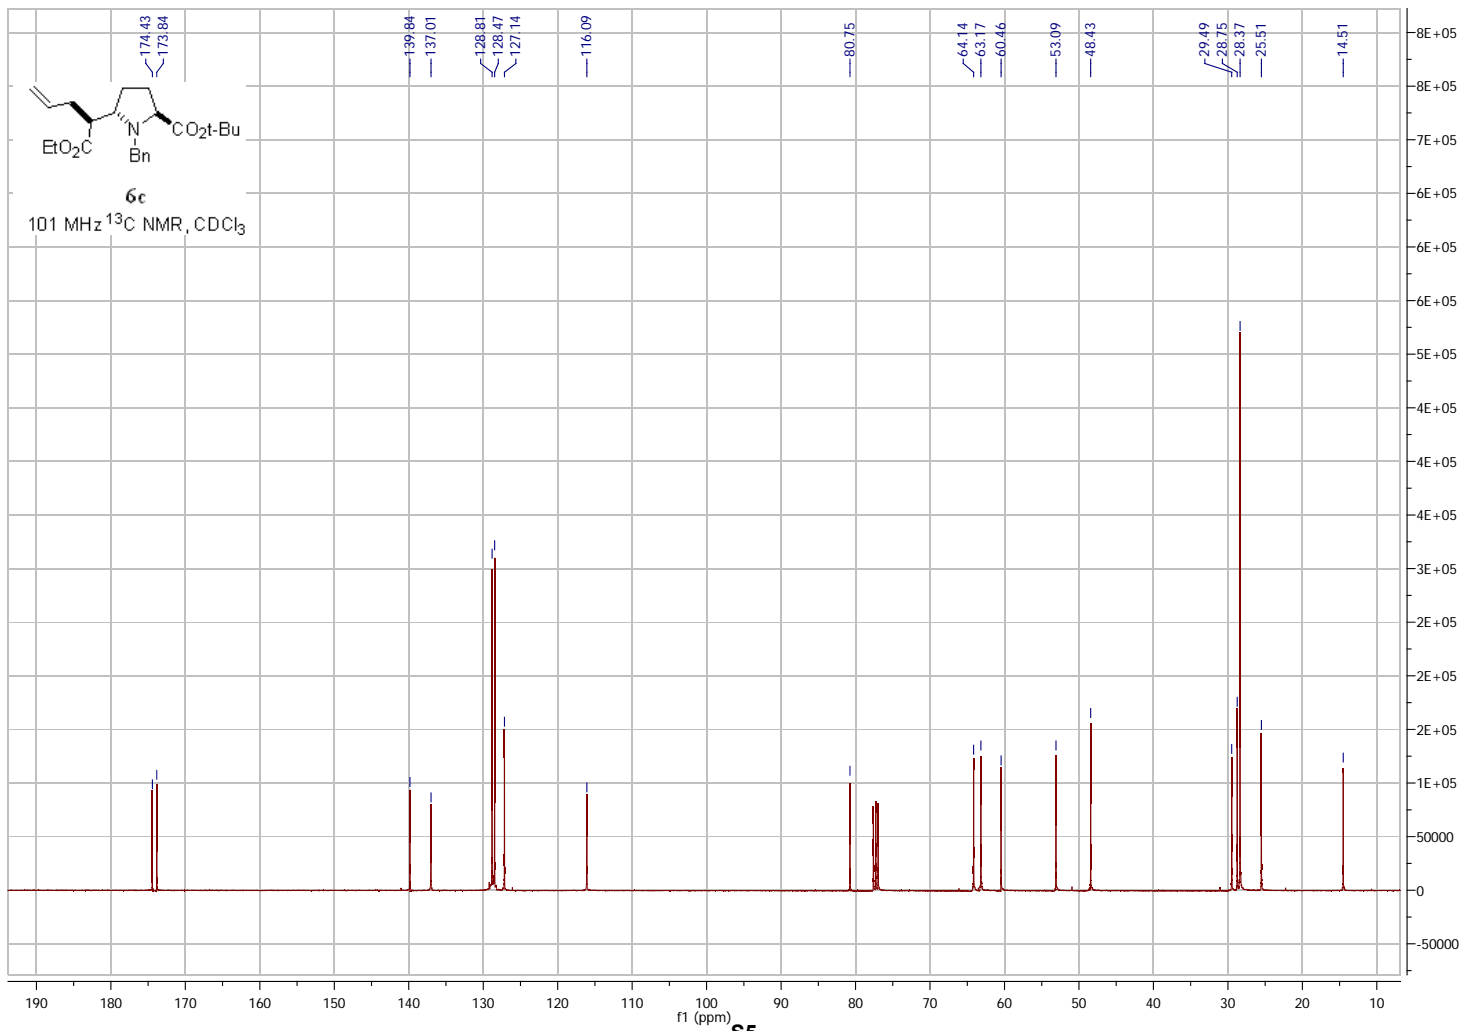

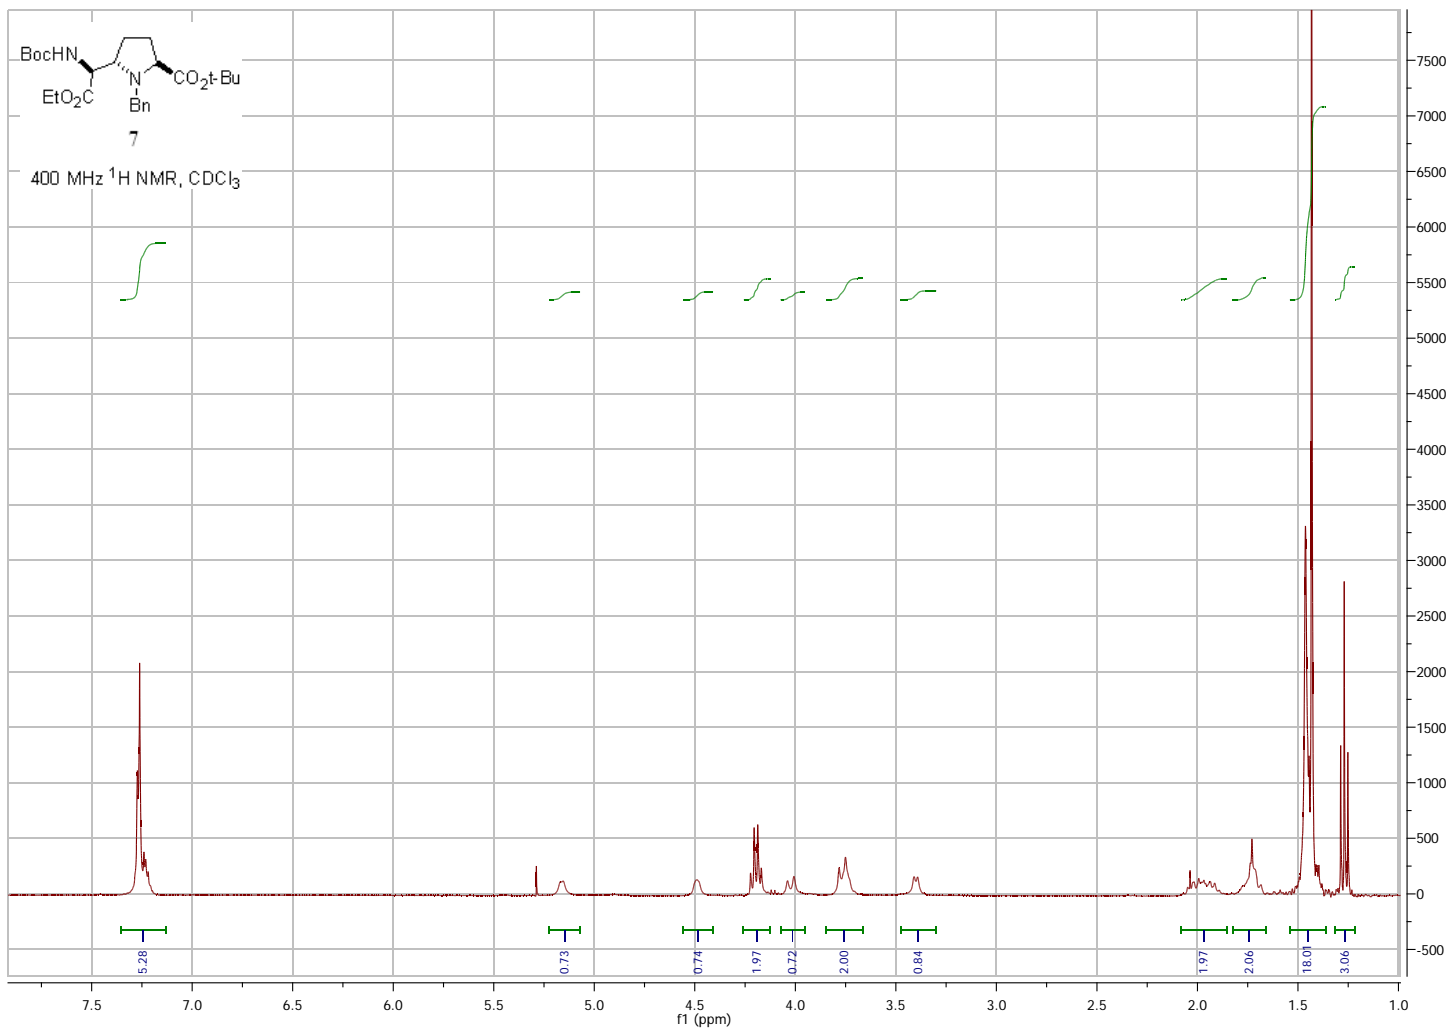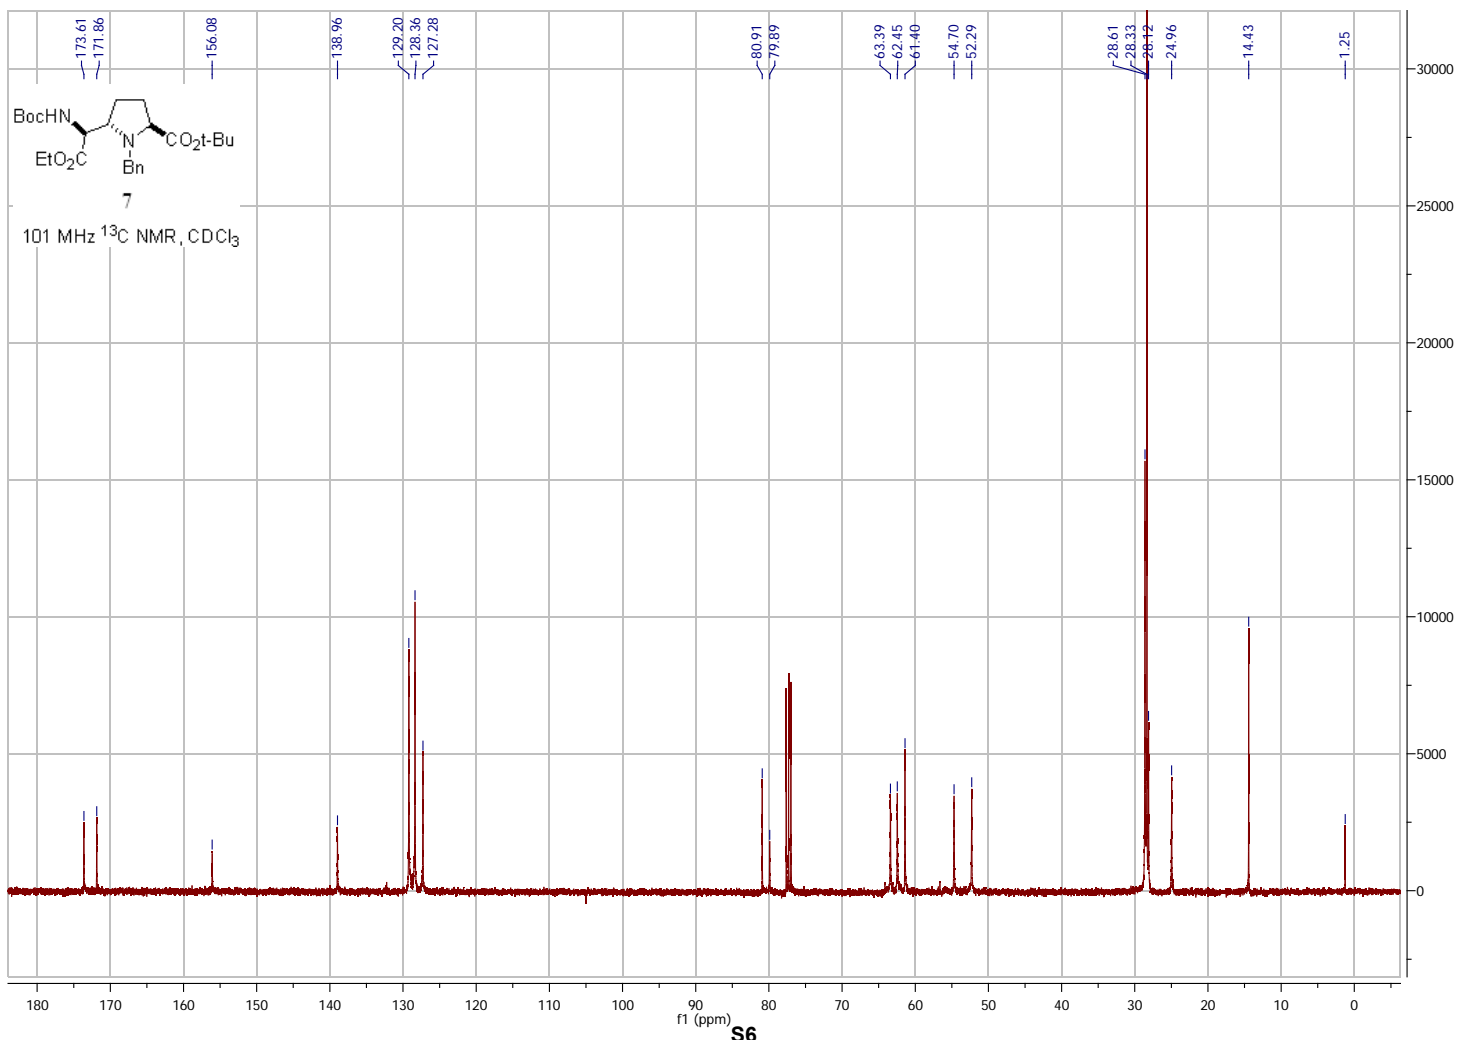

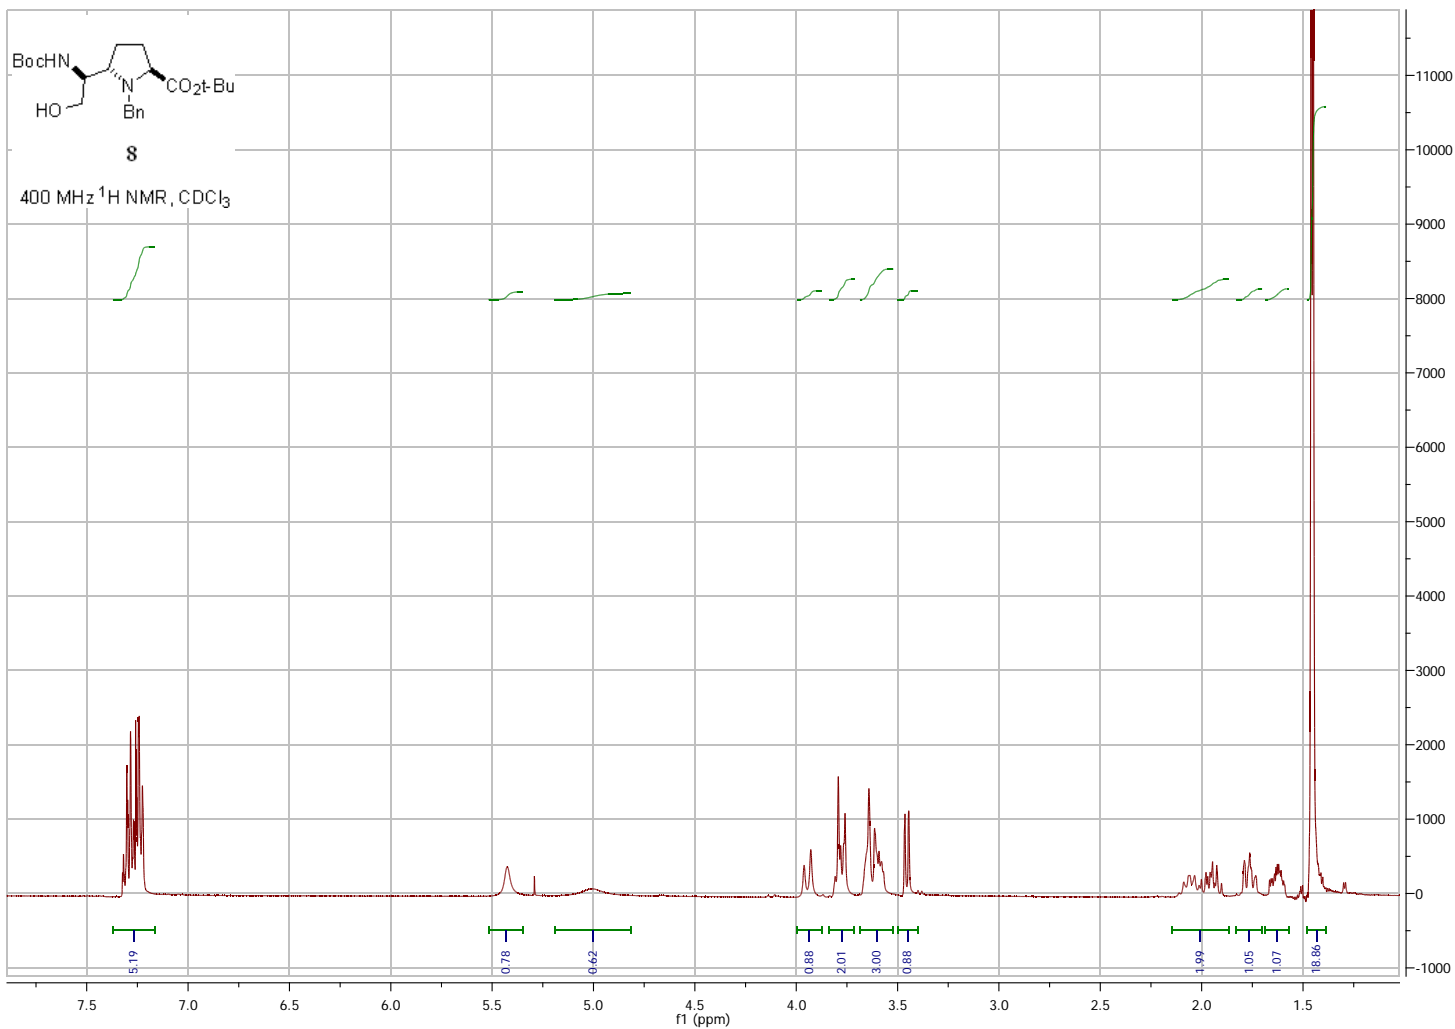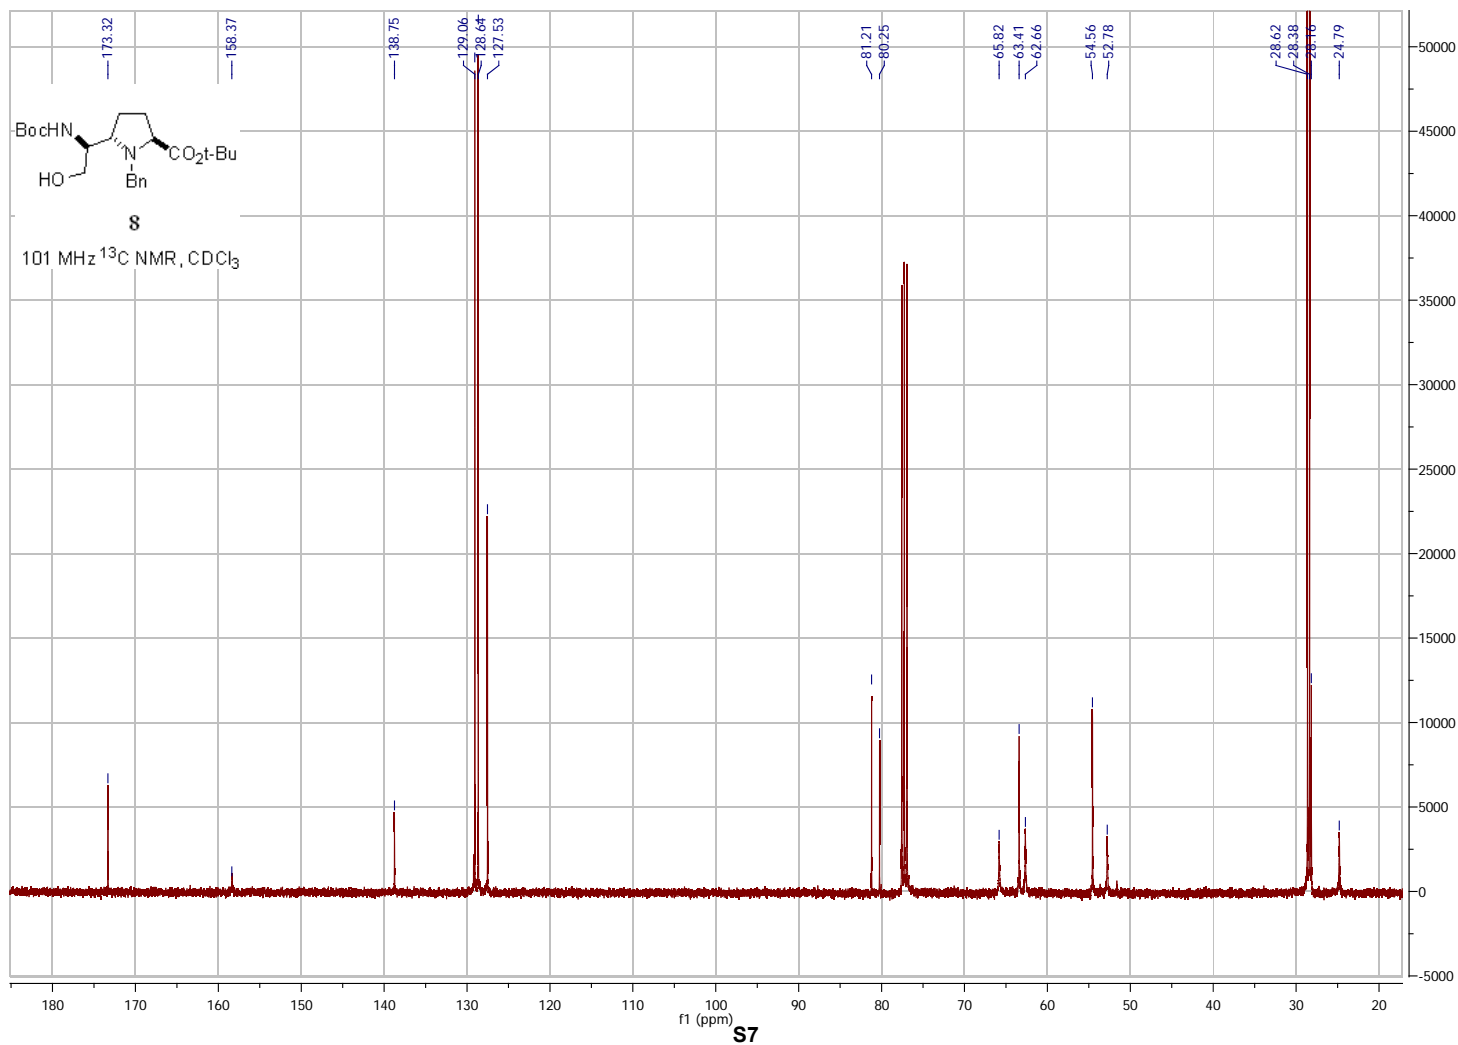

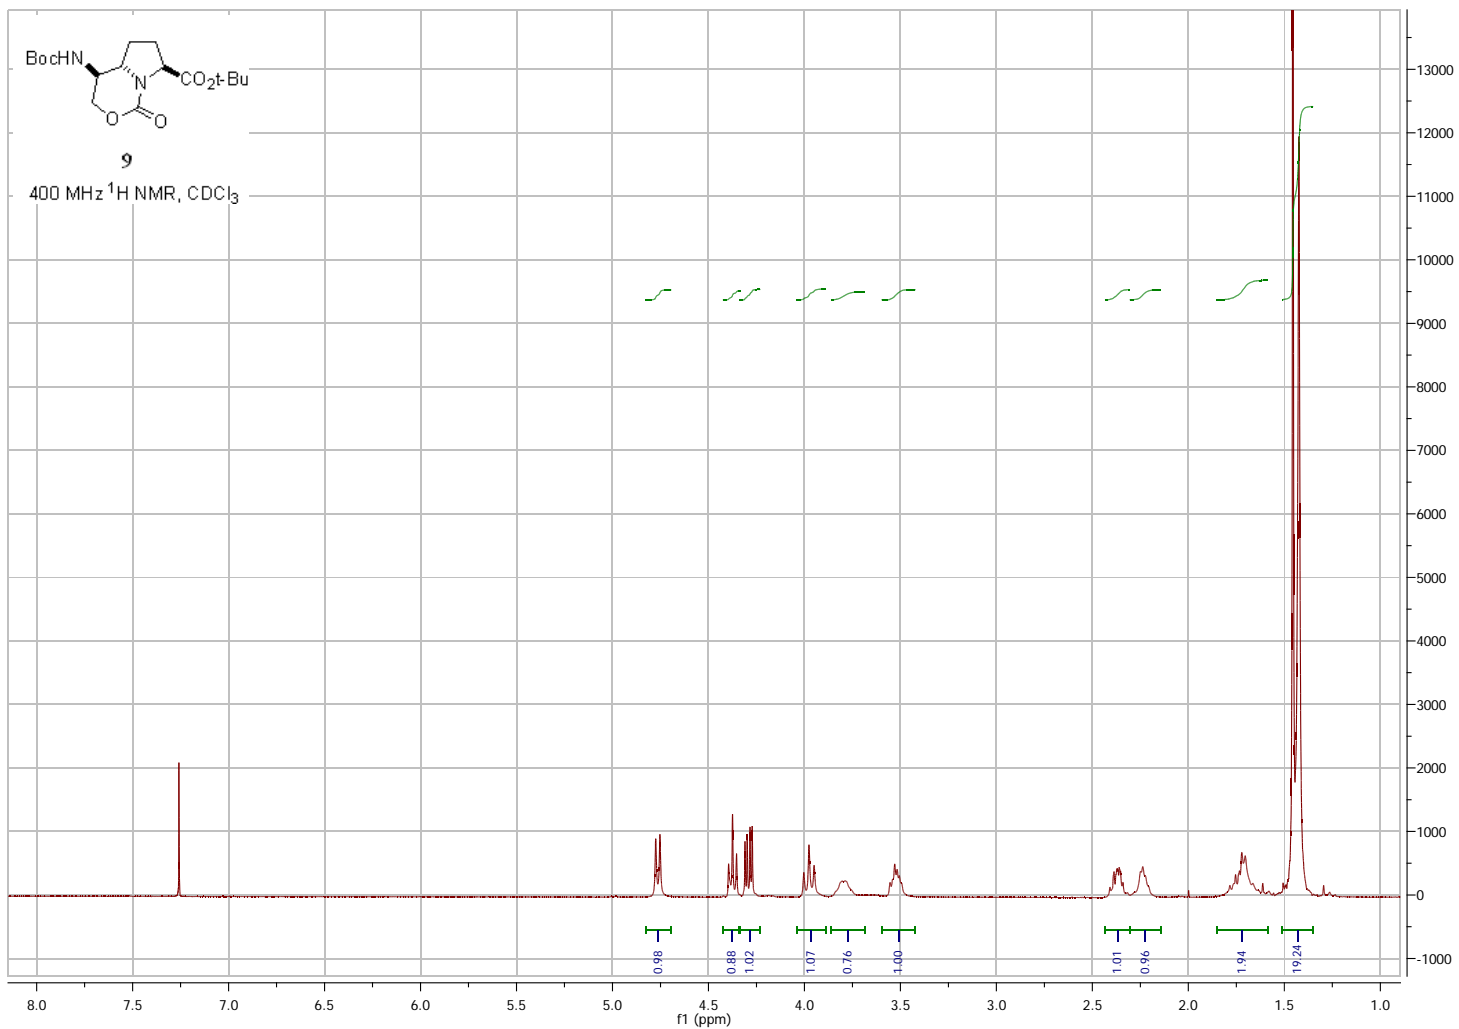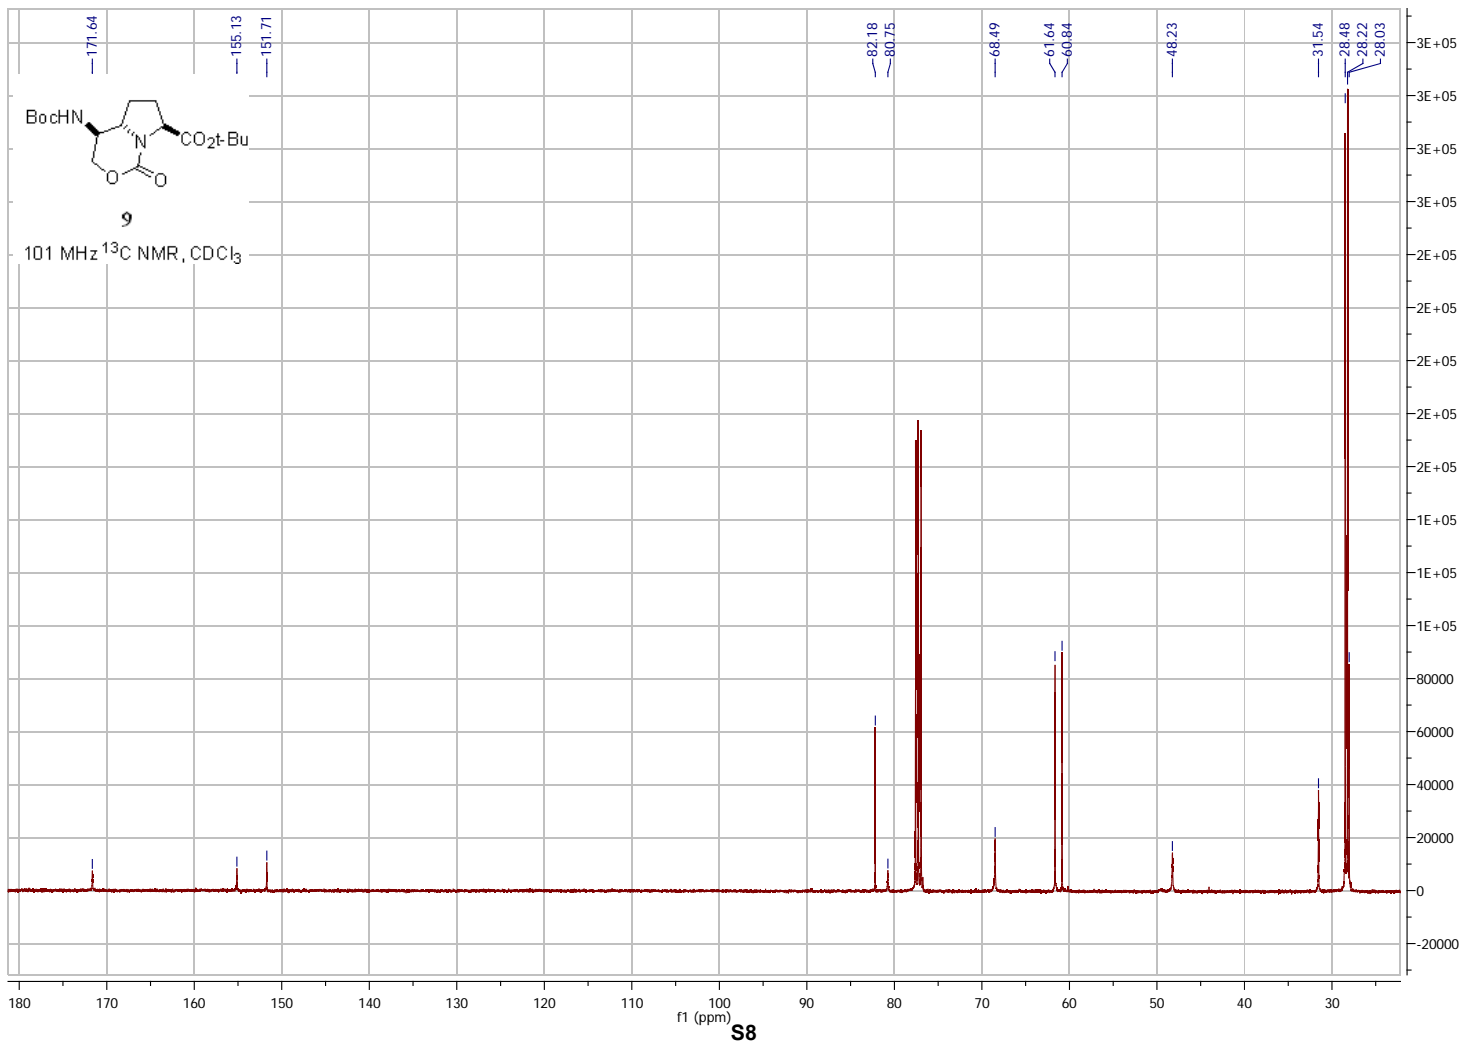

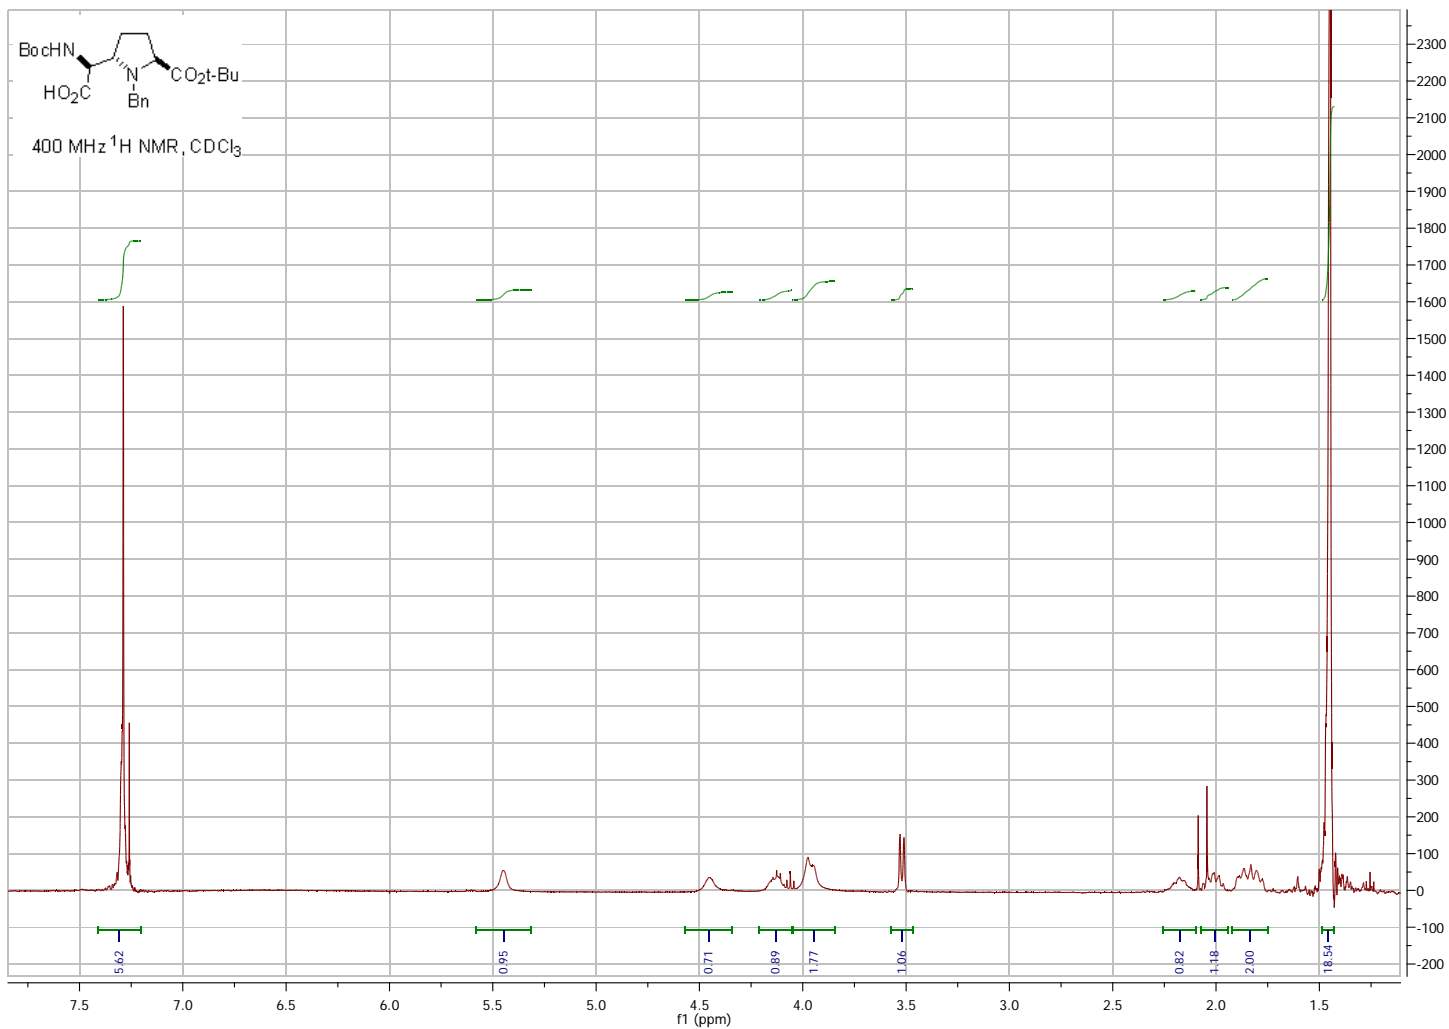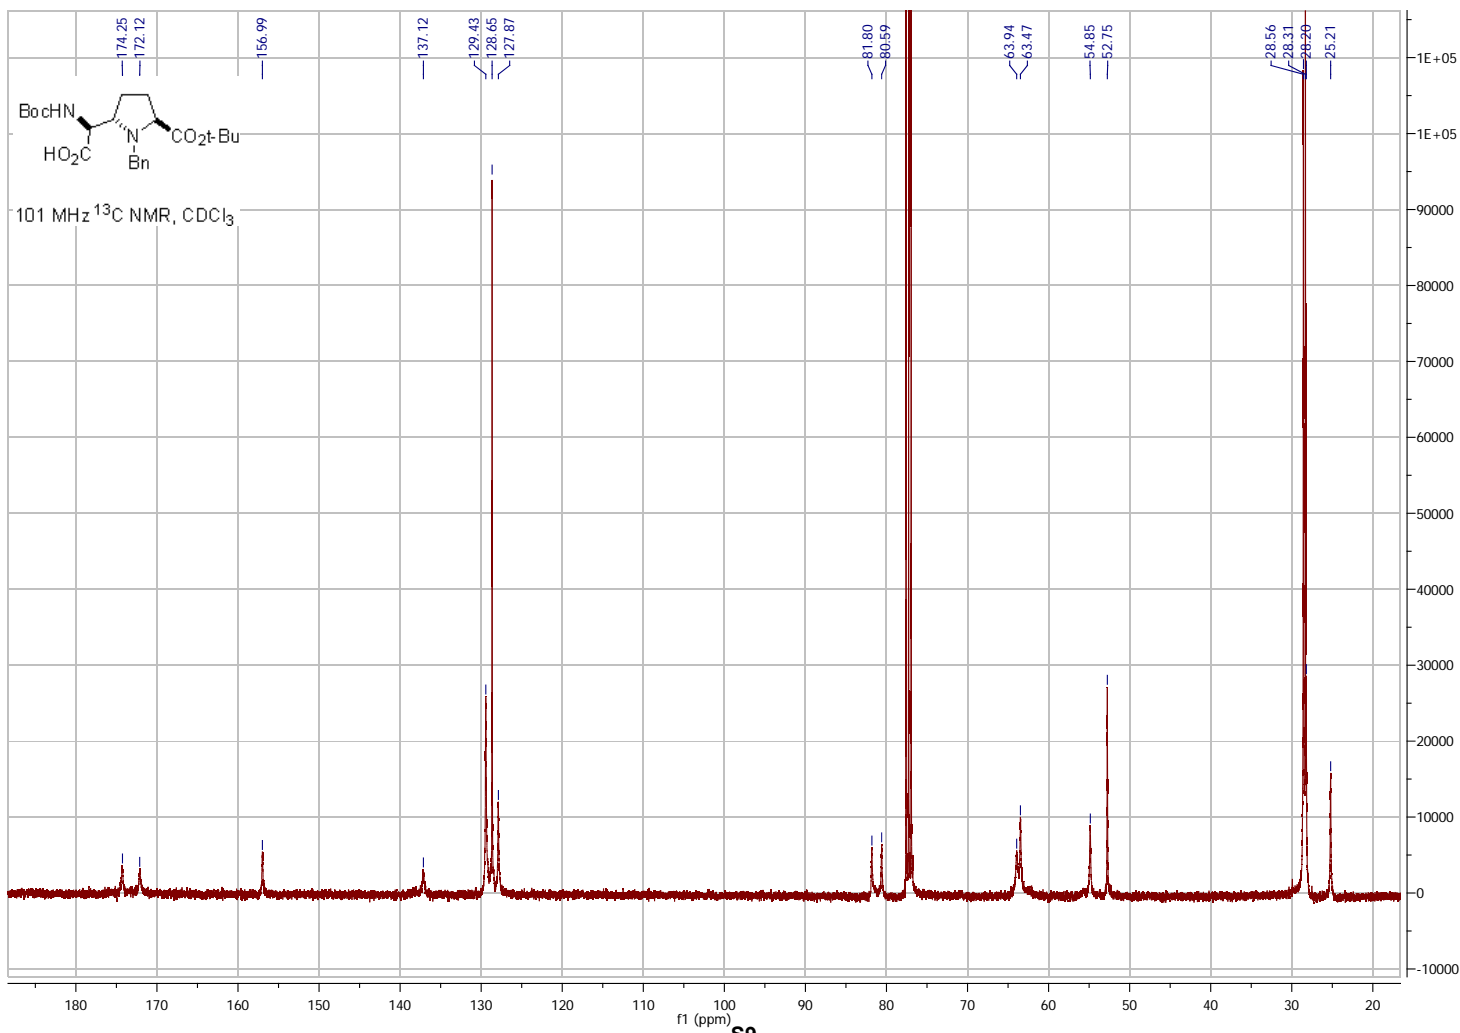

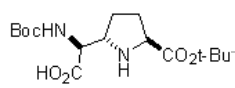

**10**

400 MHz <sup>1</sup>H NMR, CDCl<sub>3</sub>

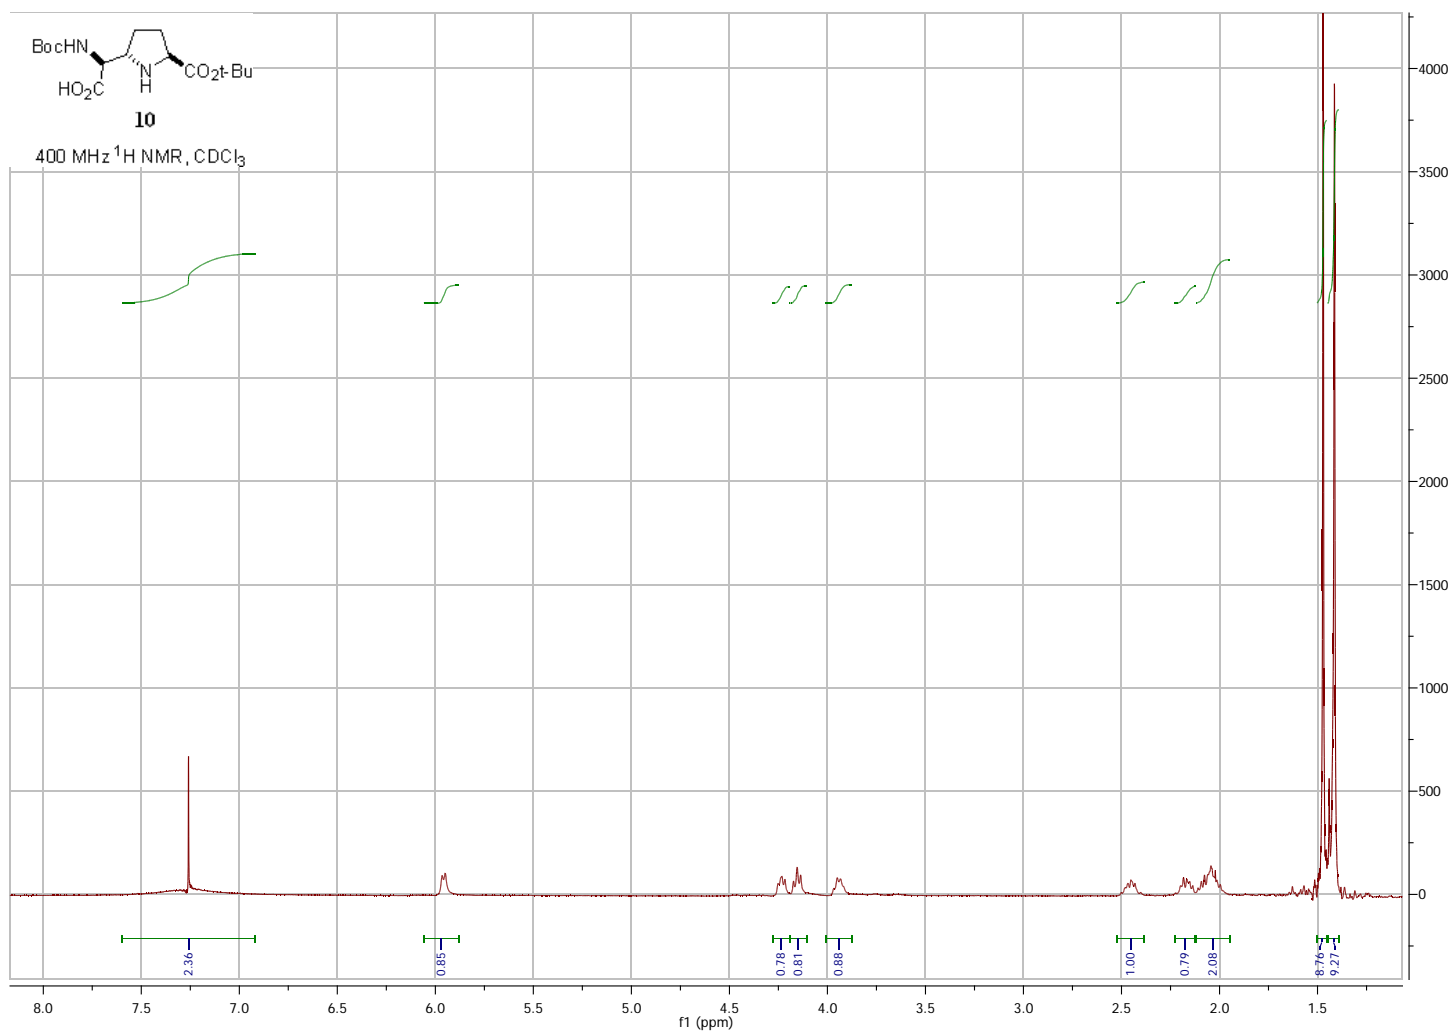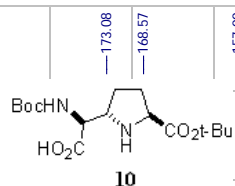

**10**

101 MHz <sup>13</sup>C NMR, CDCl<sub>3</sub>

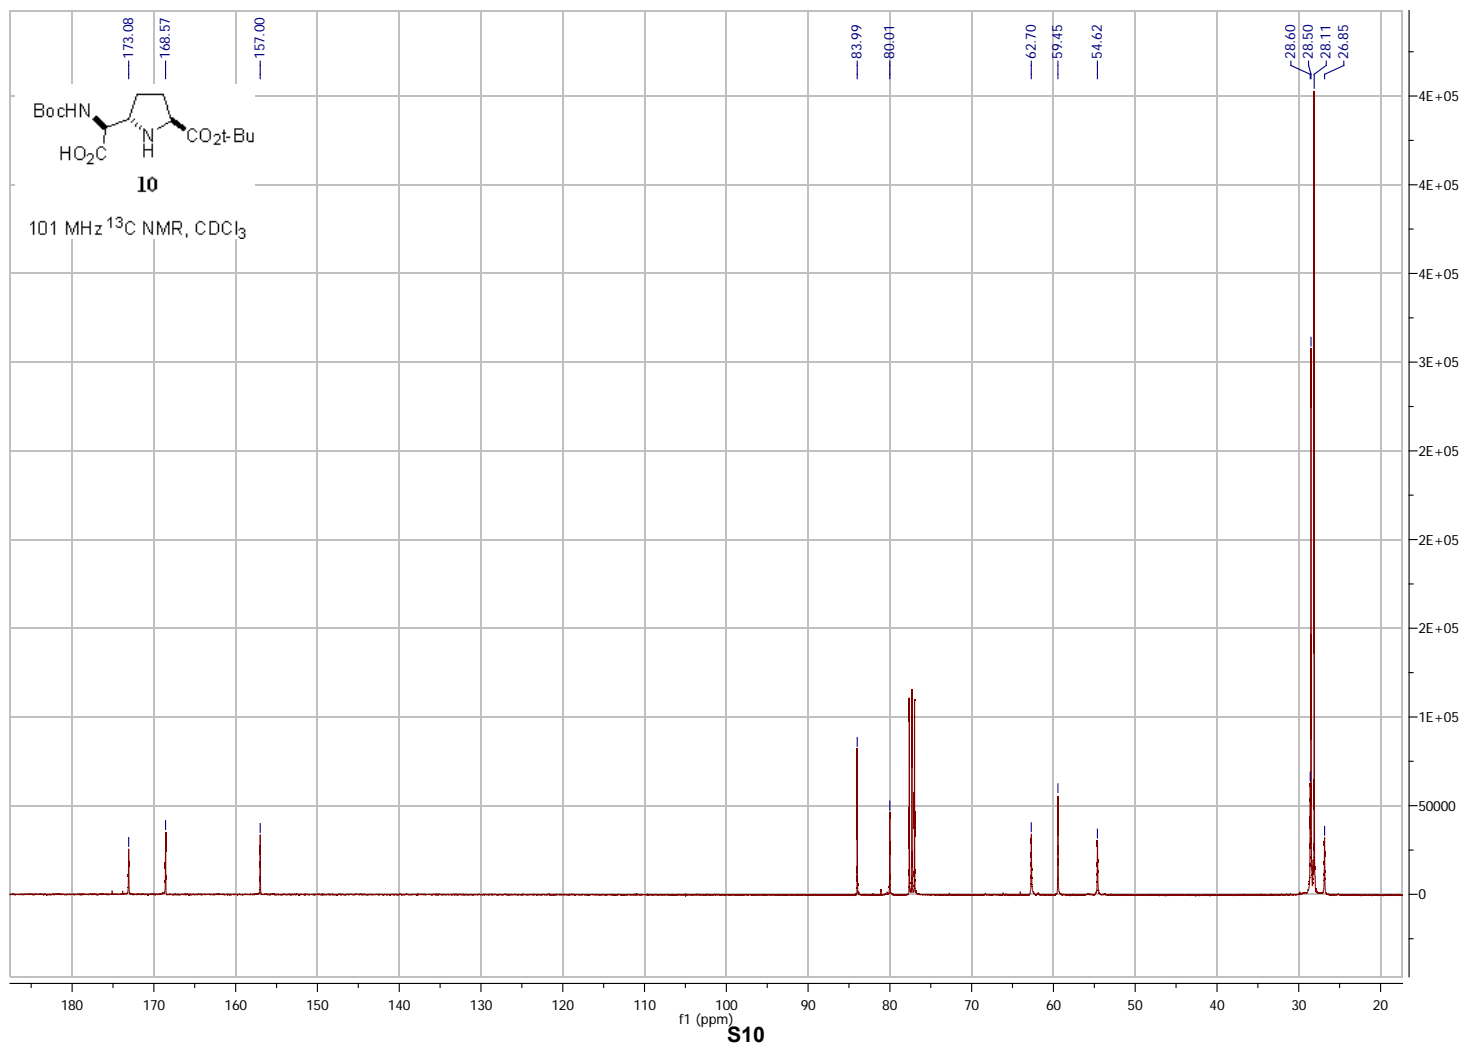

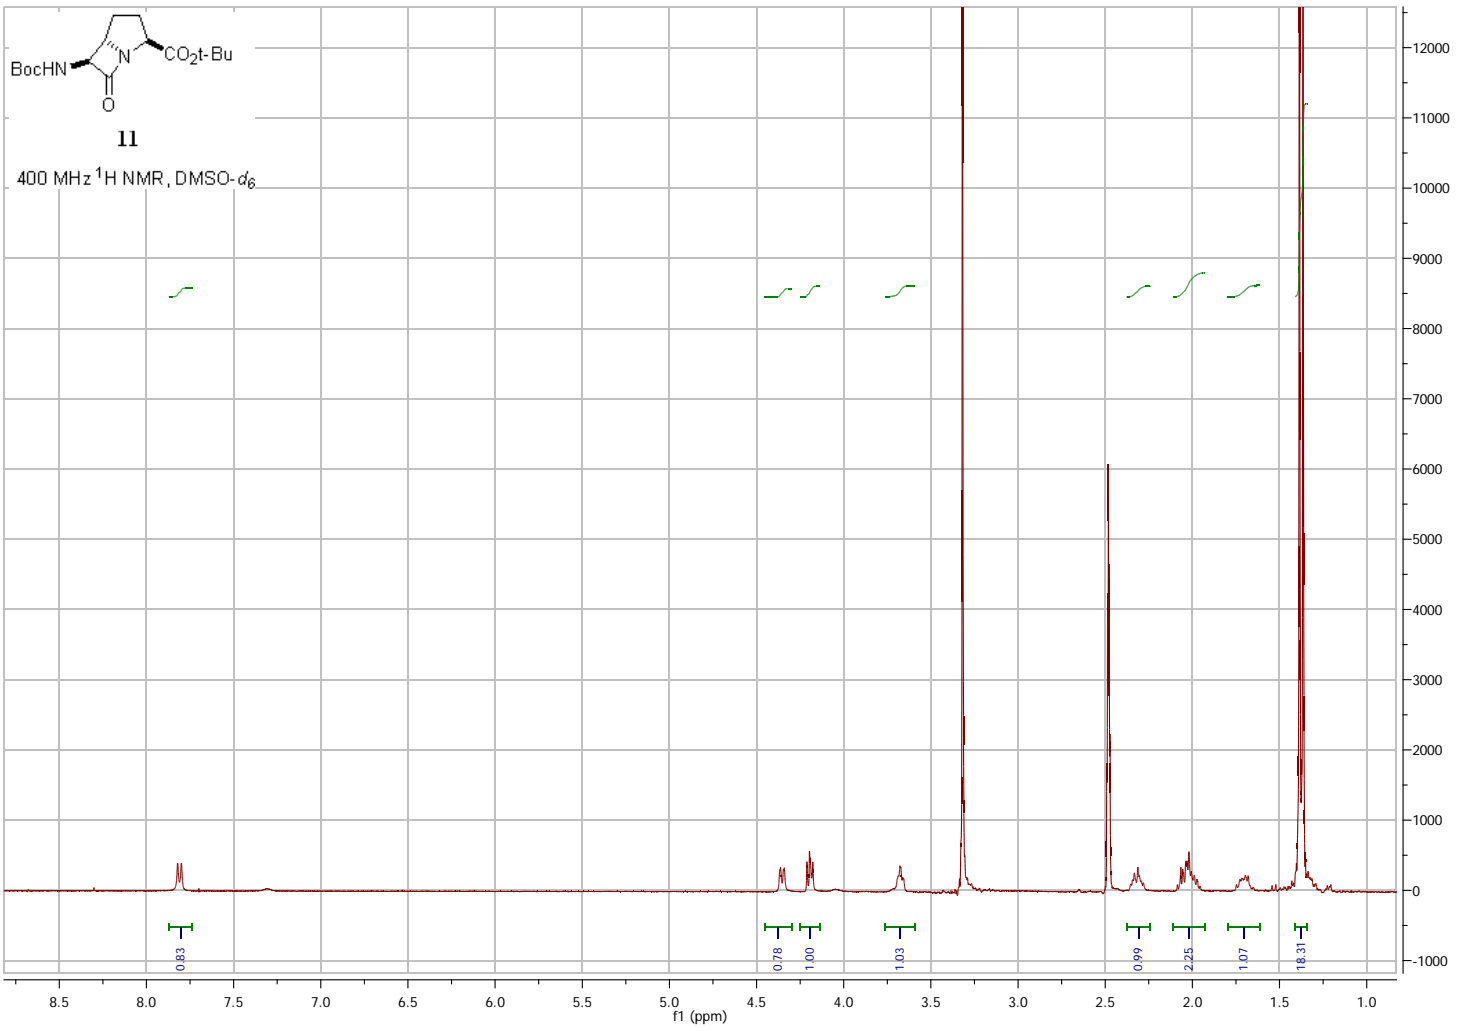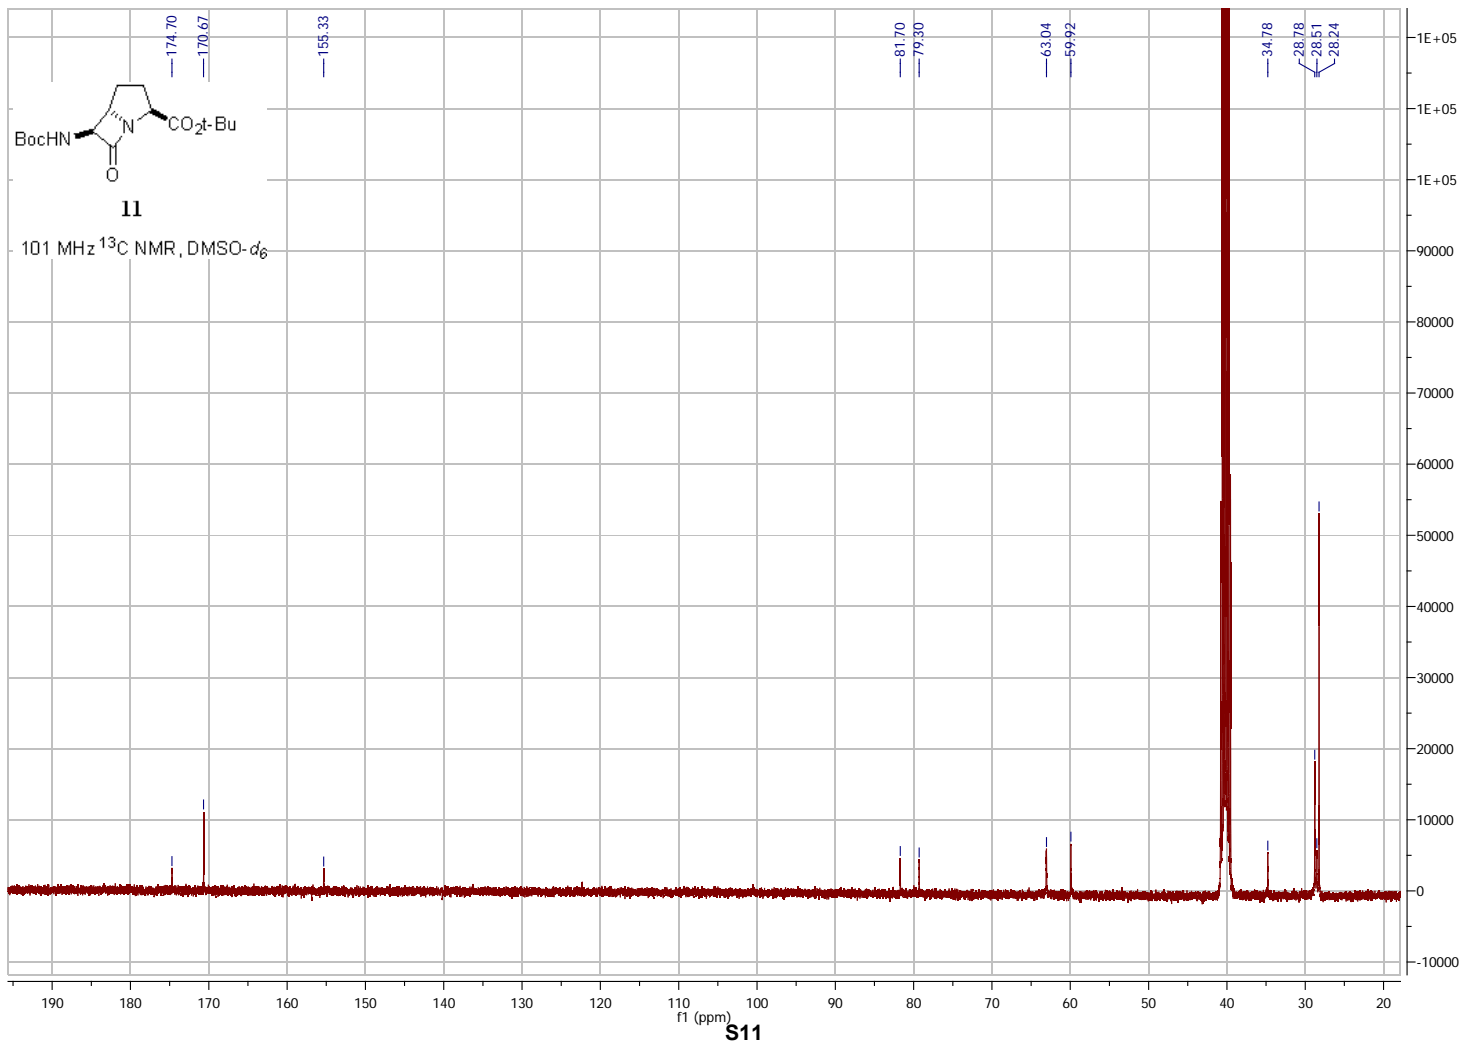

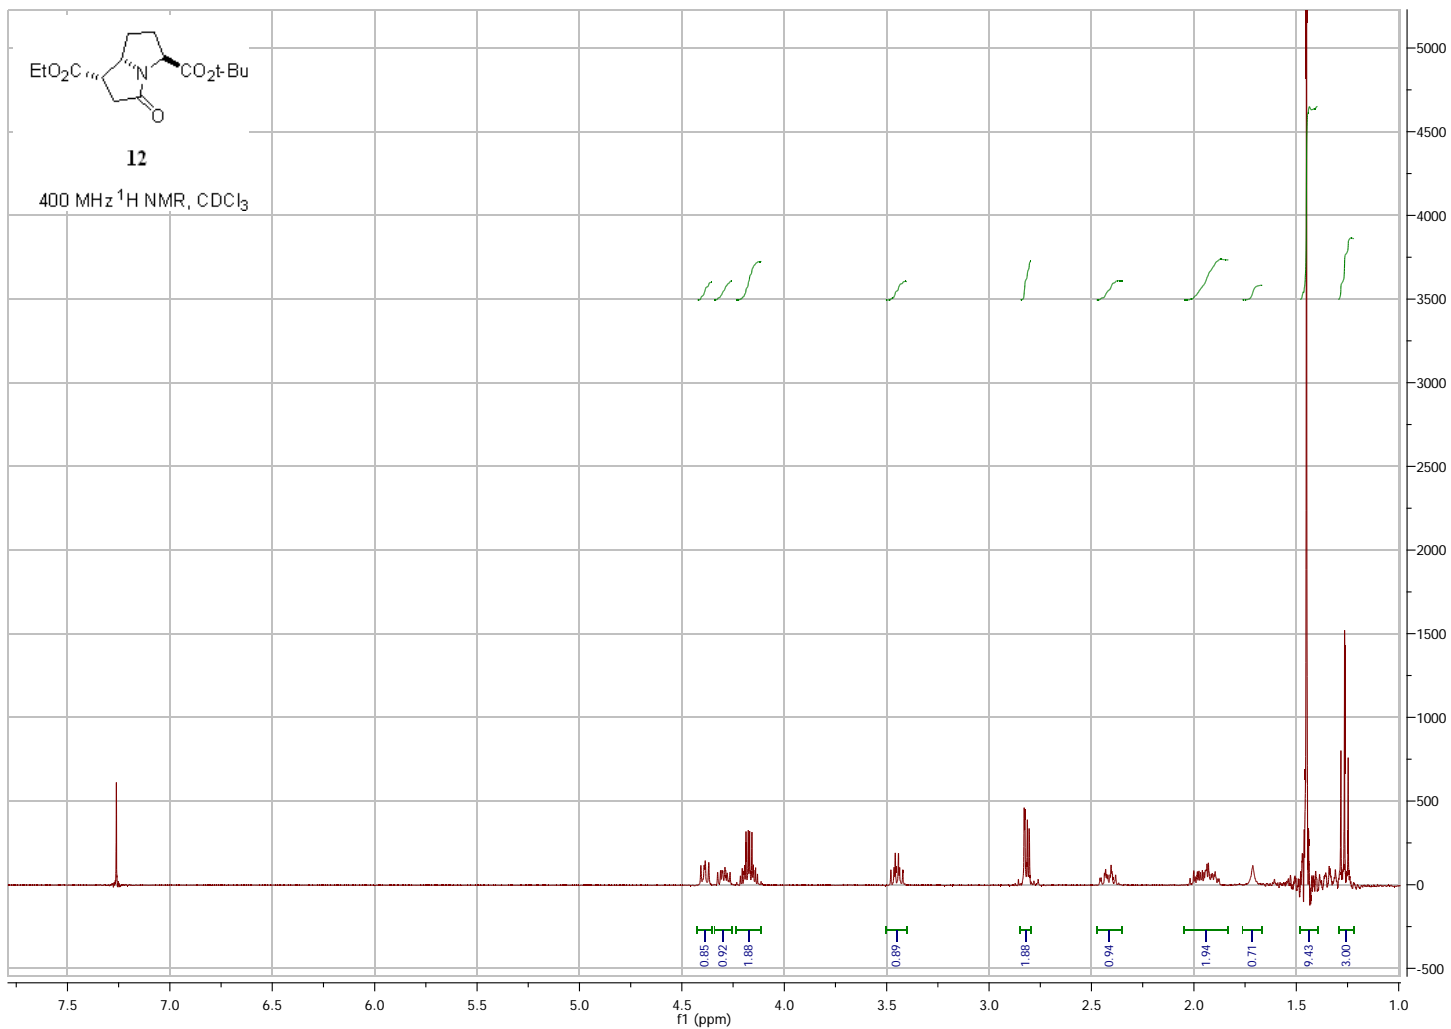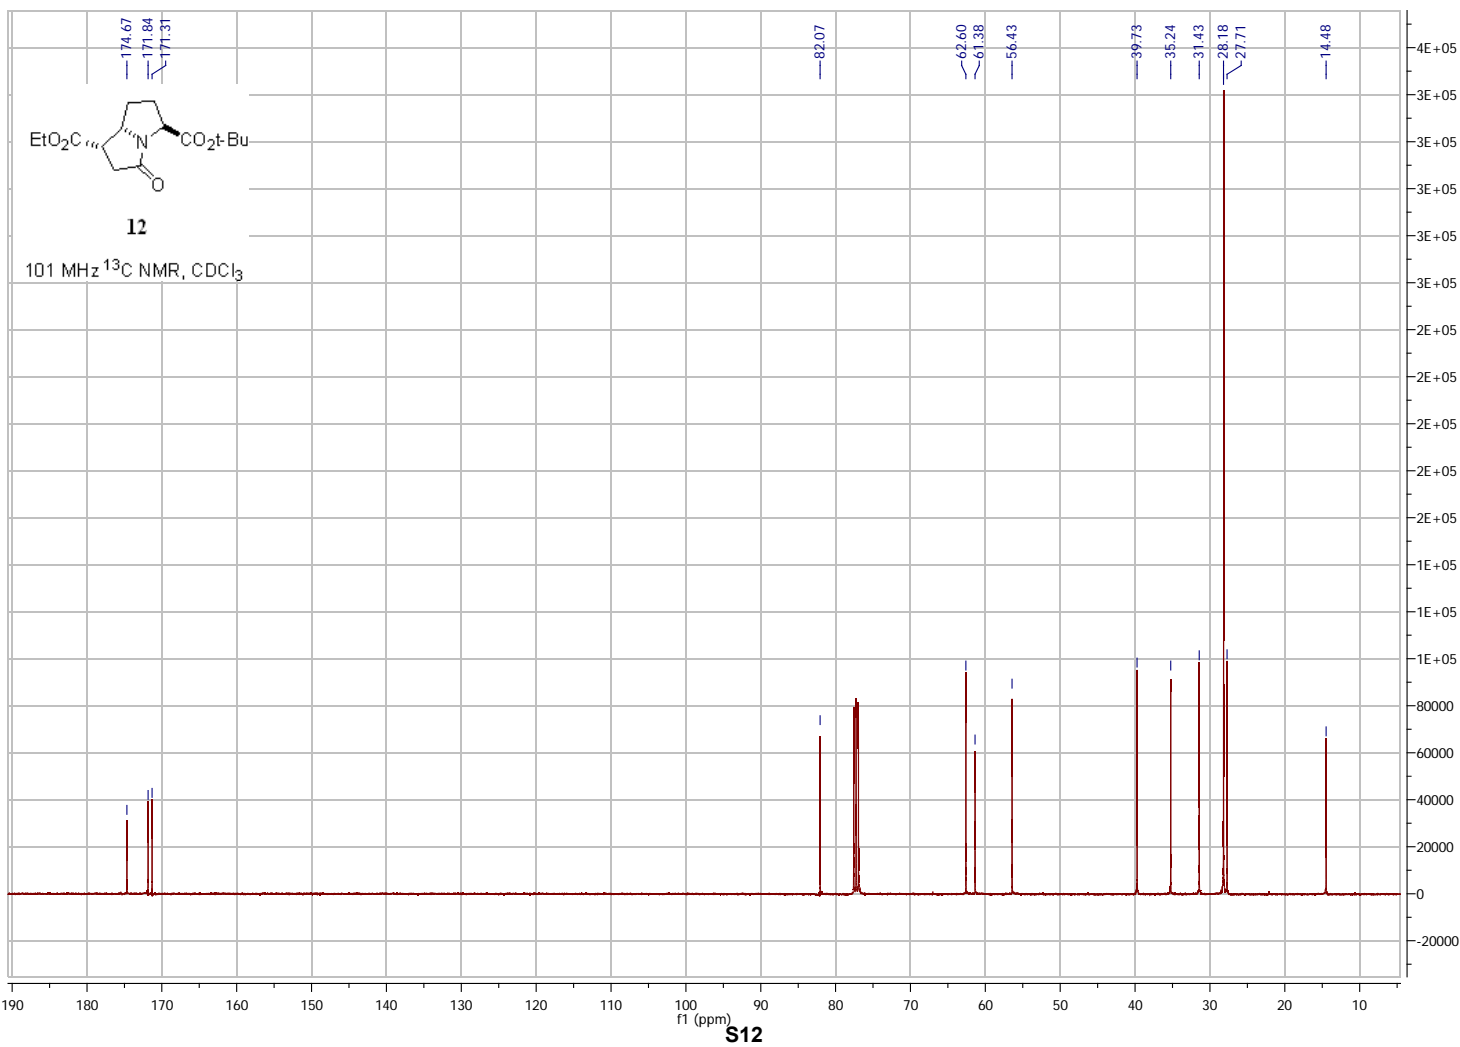



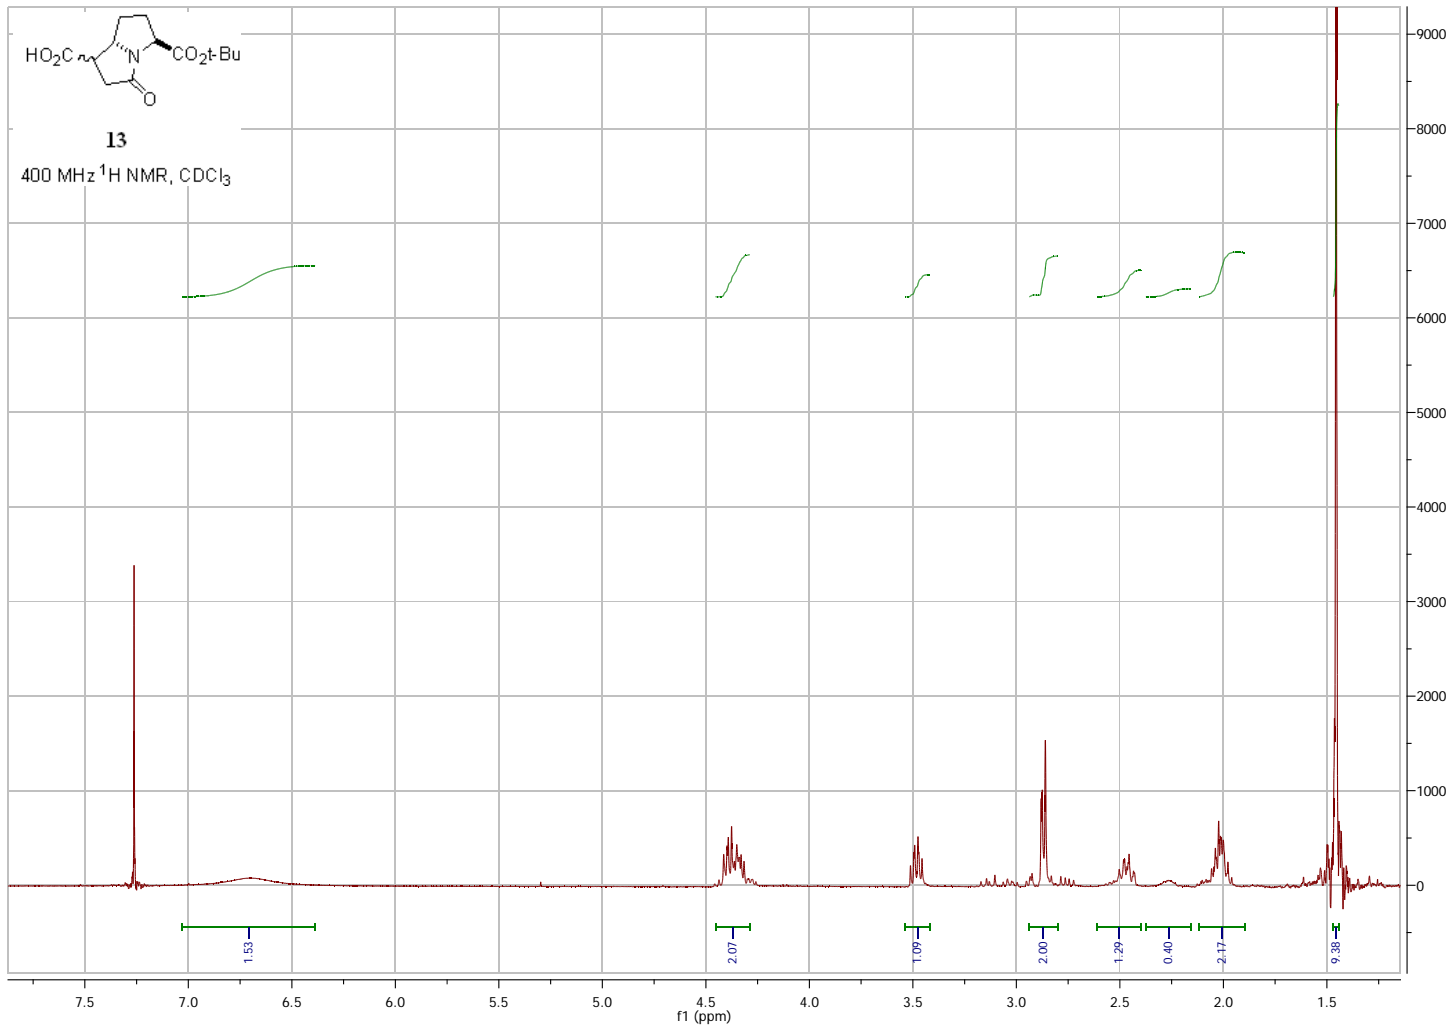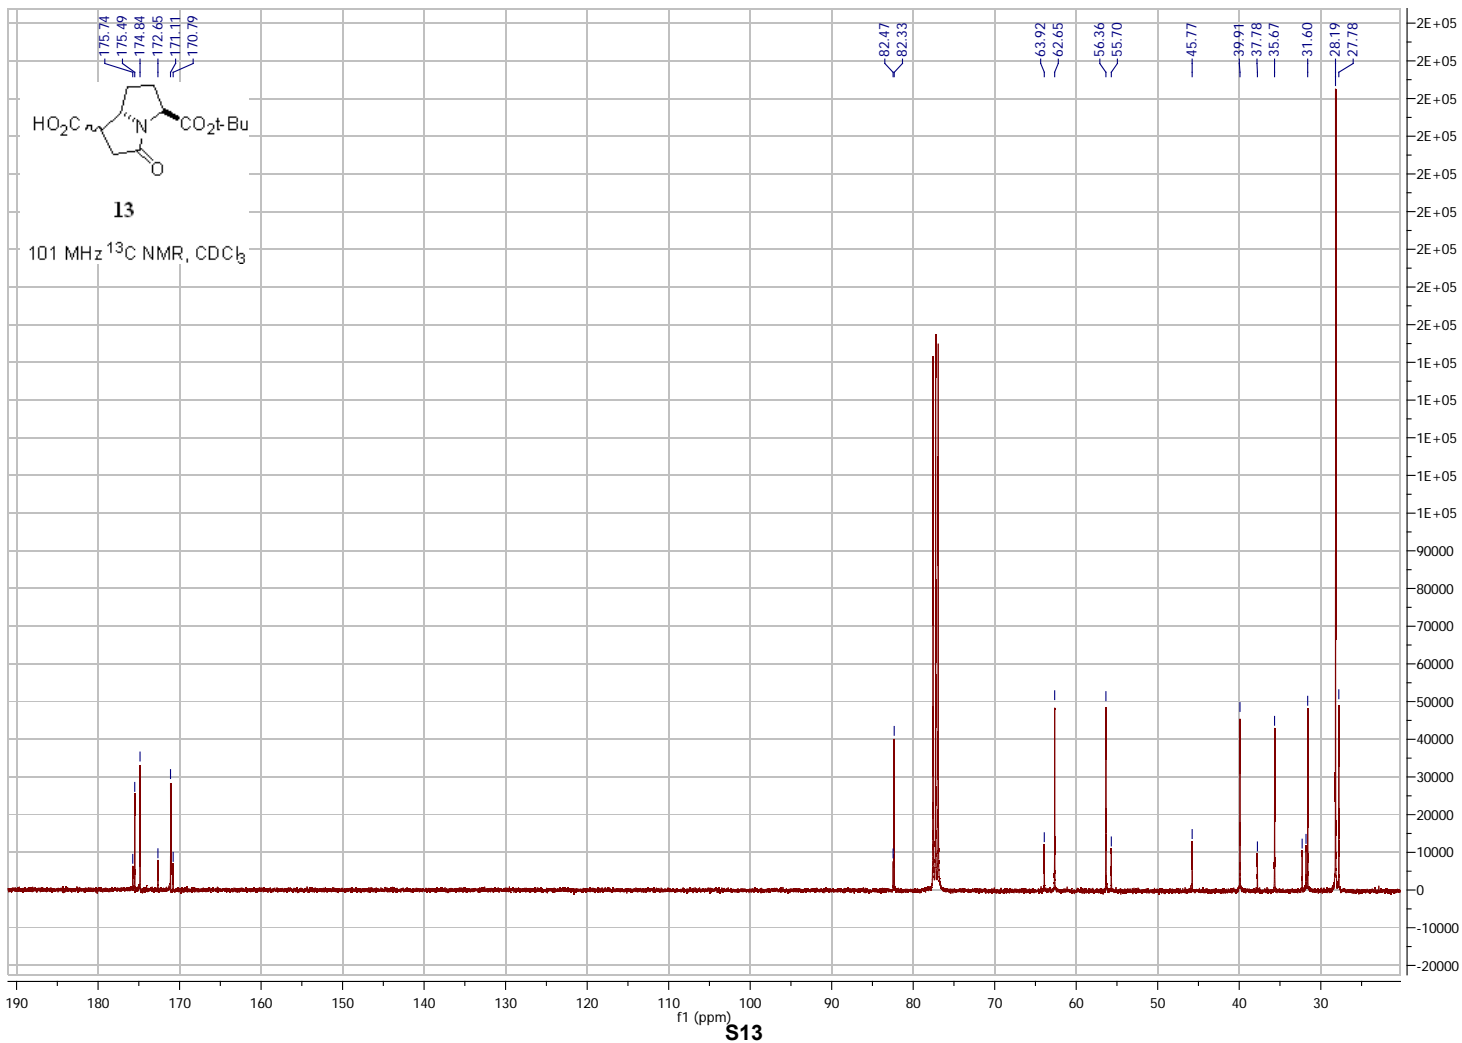

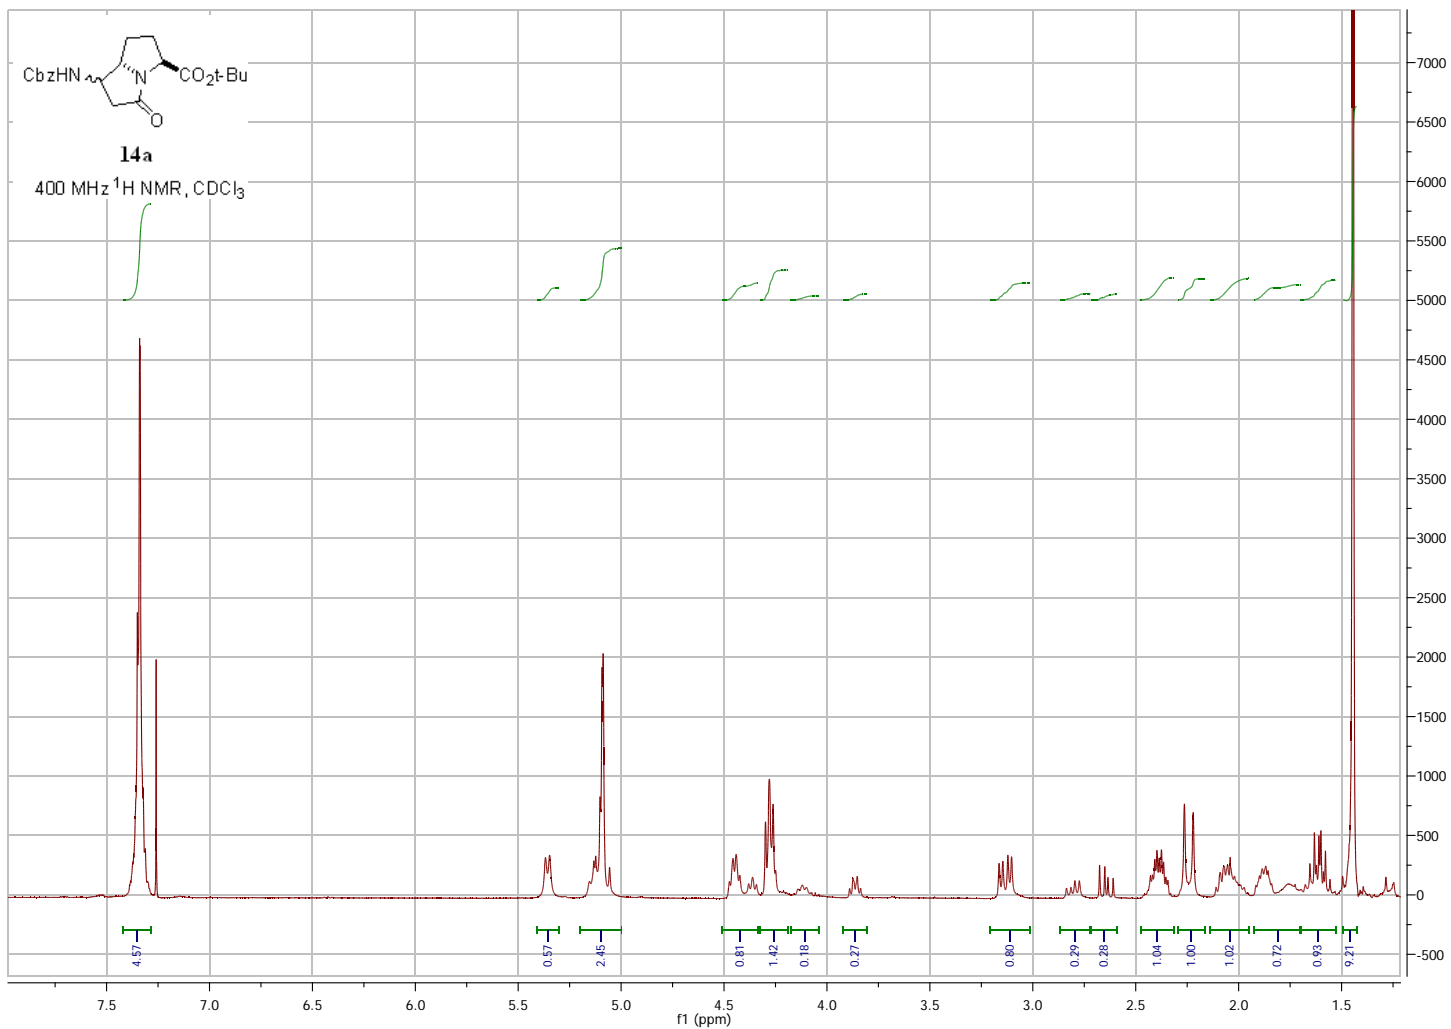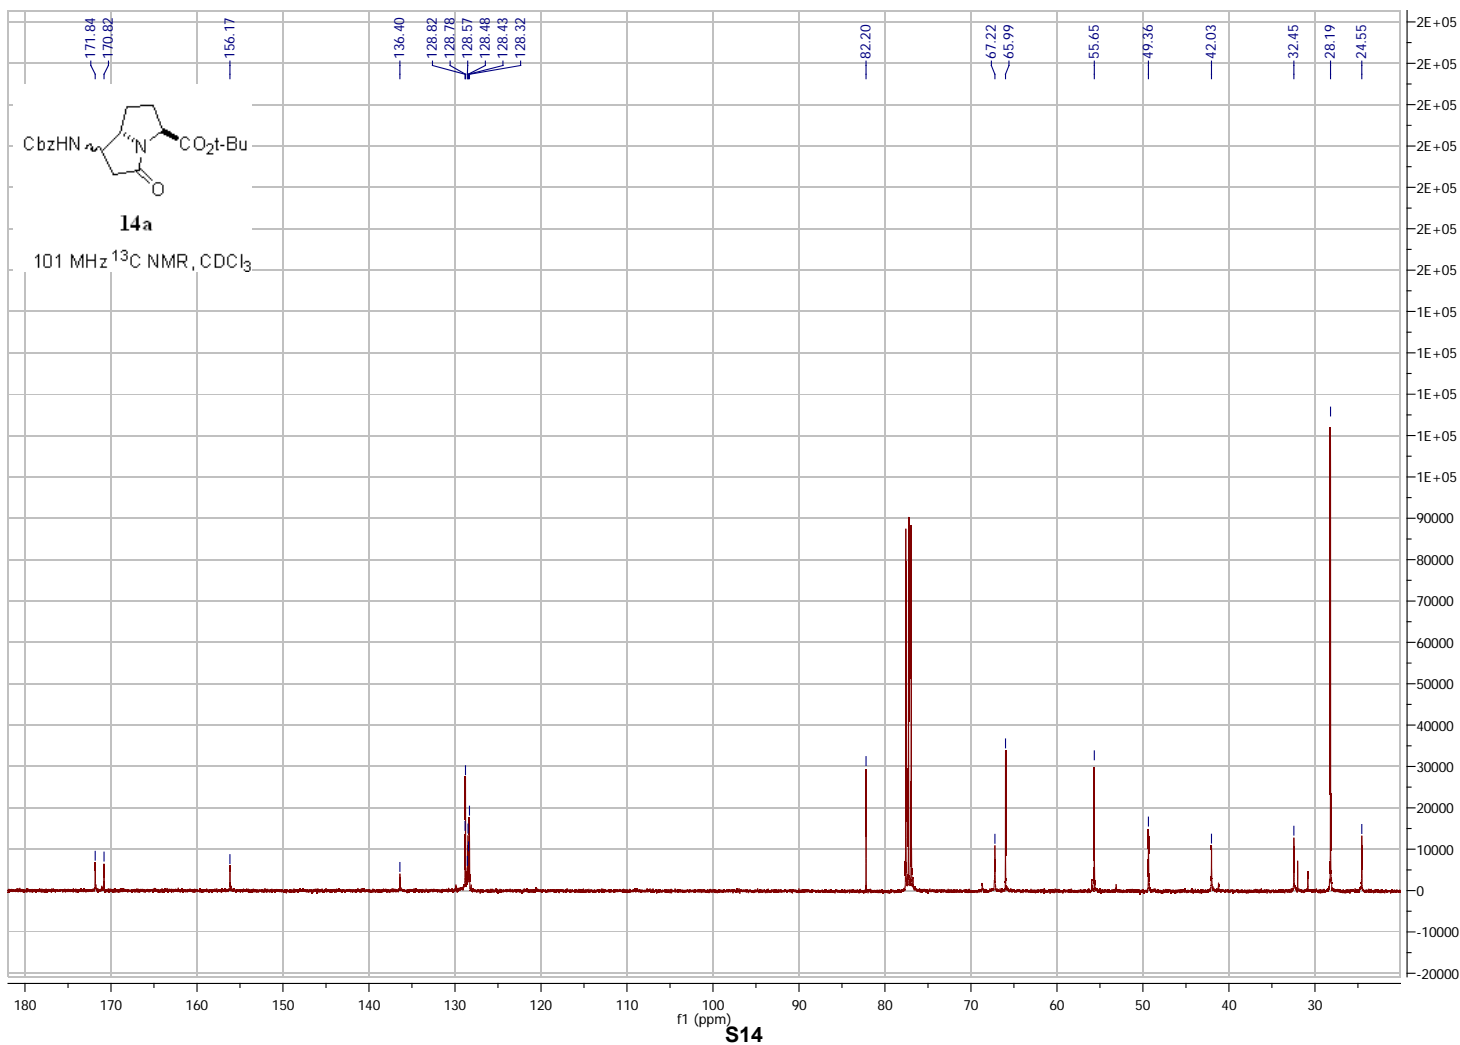

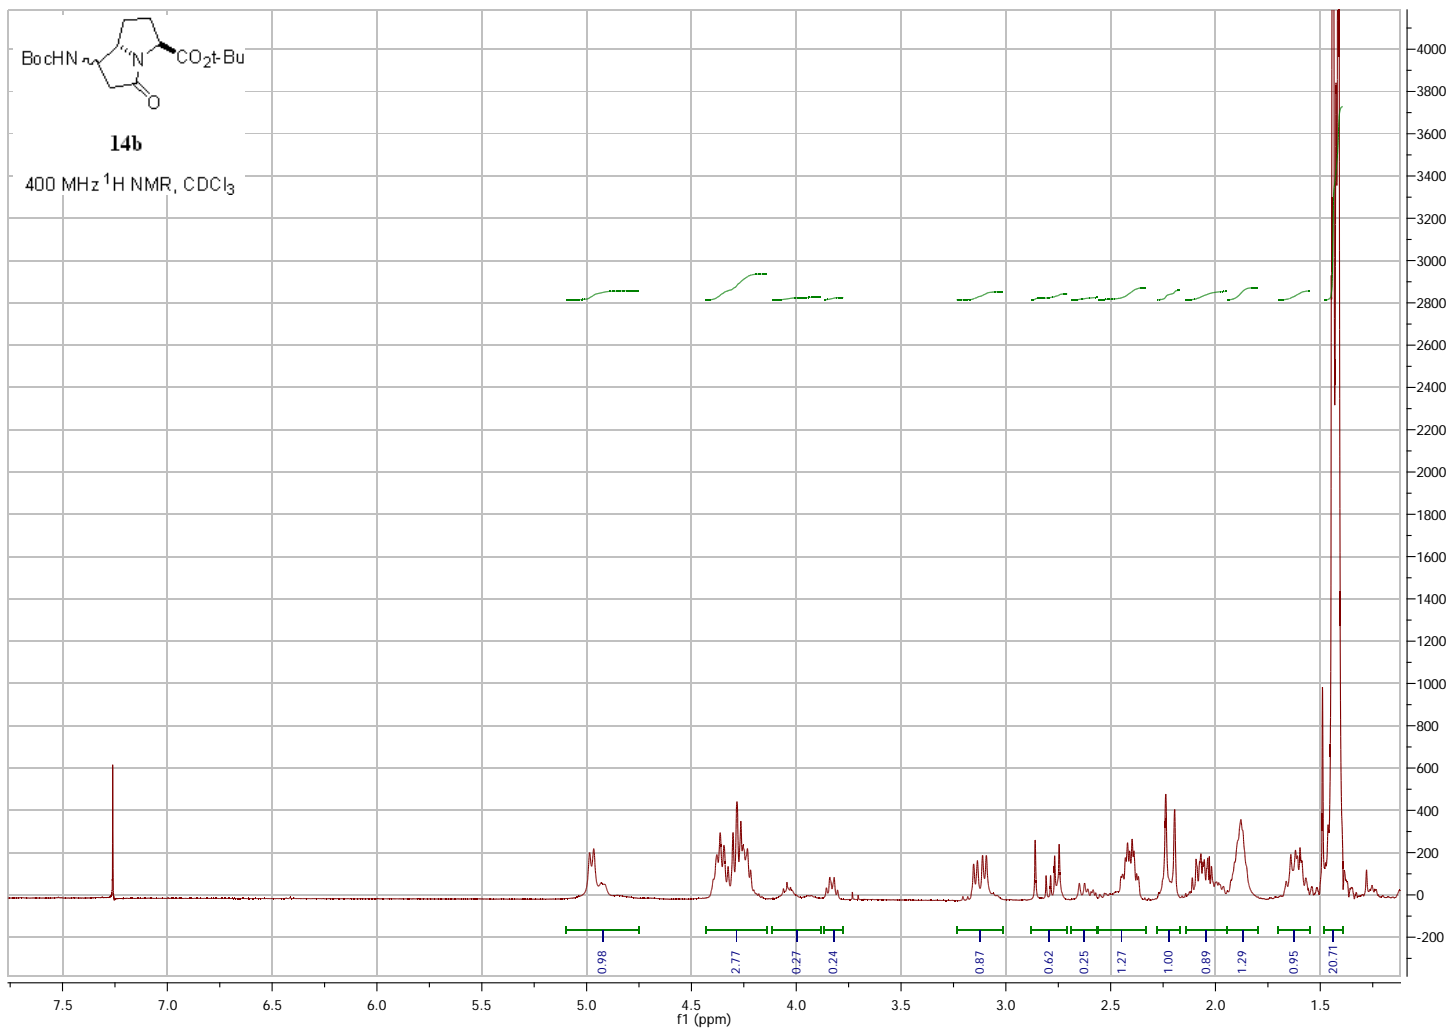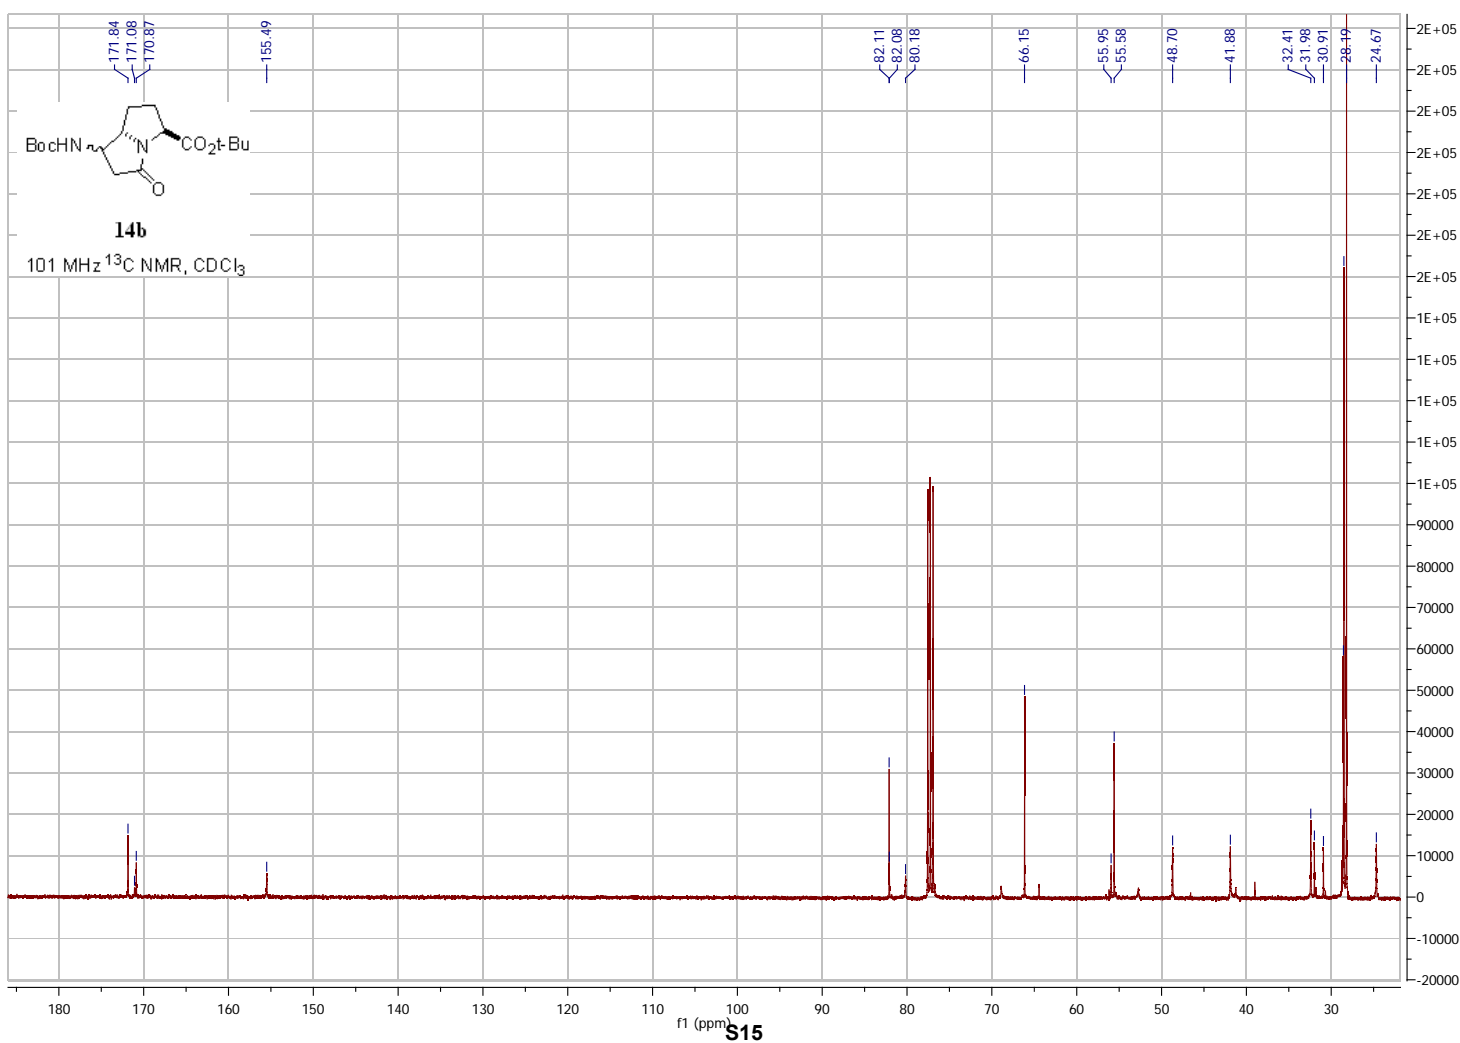

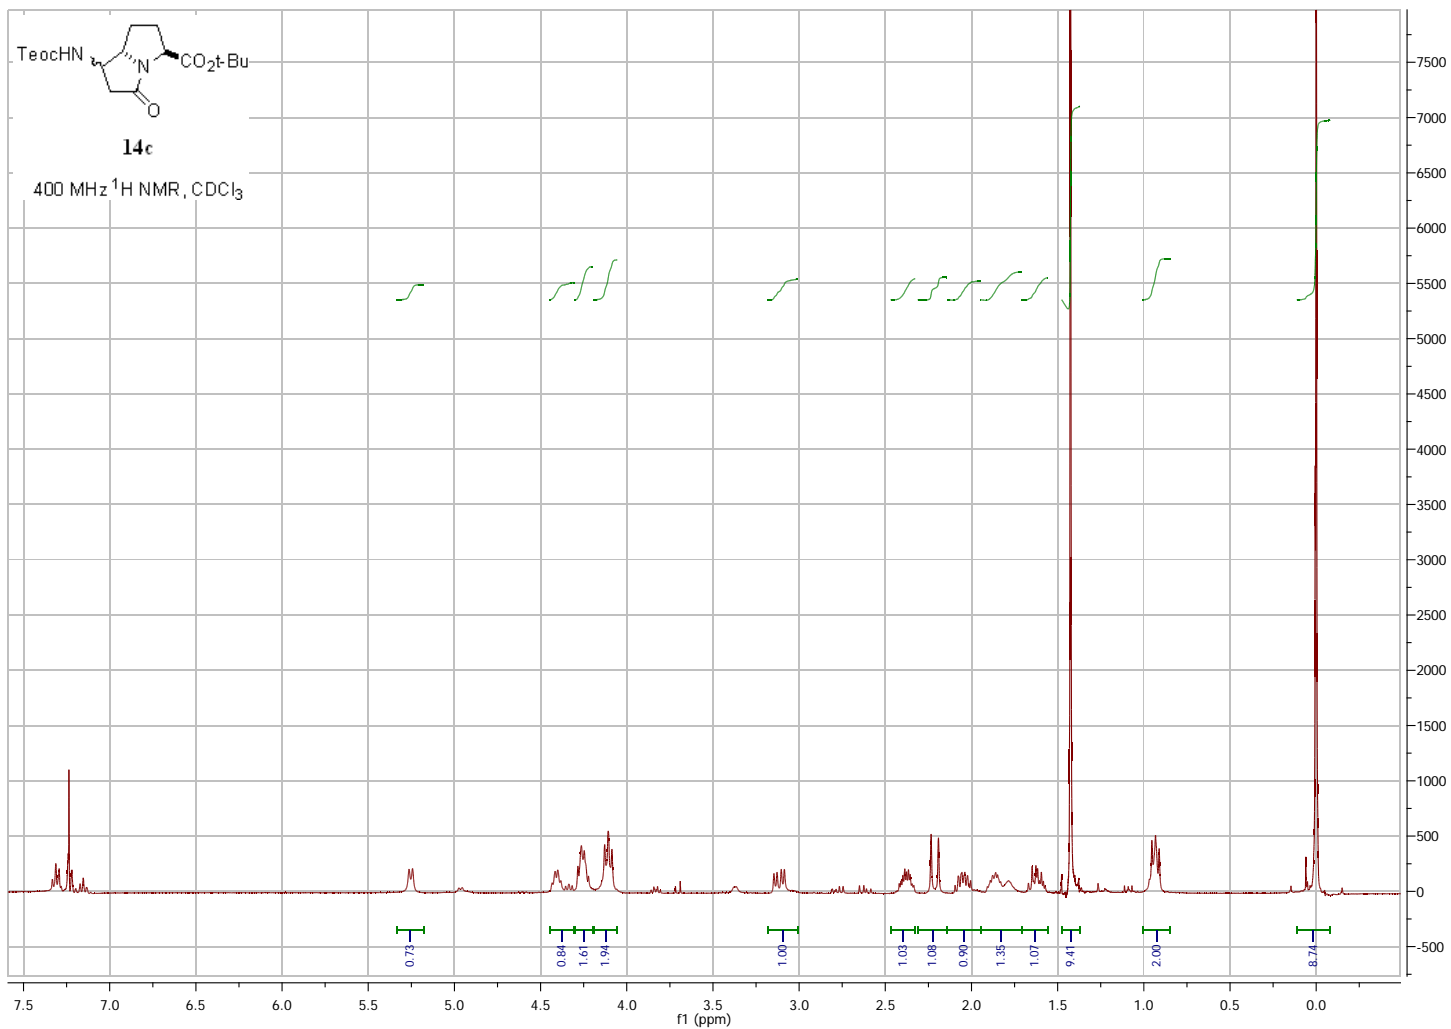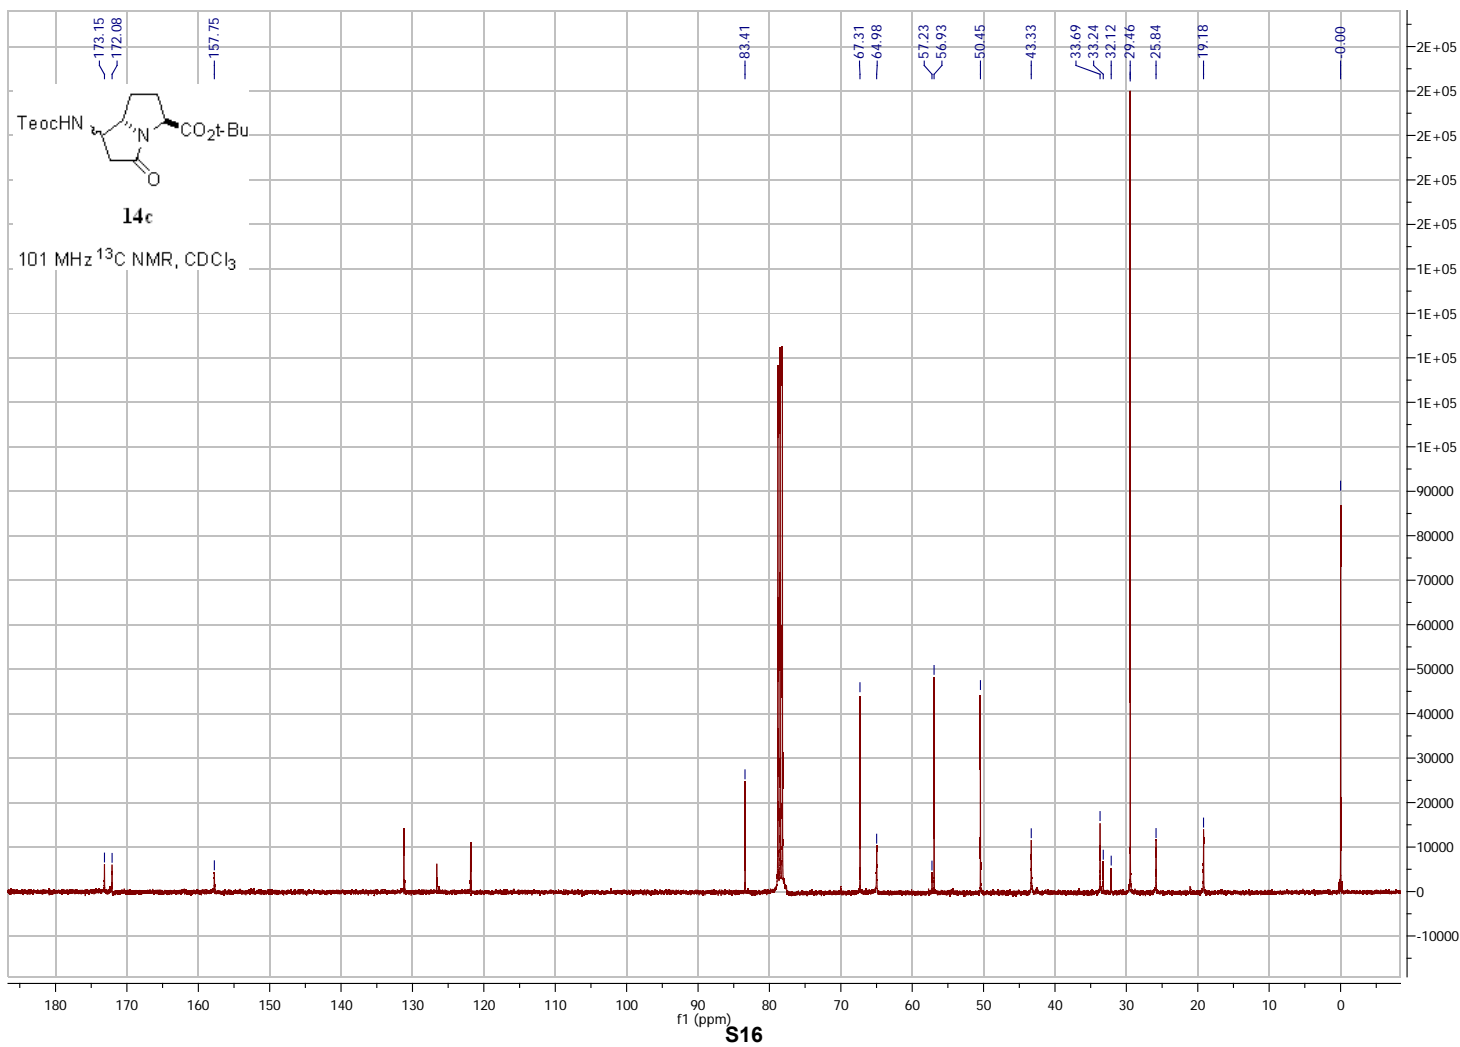

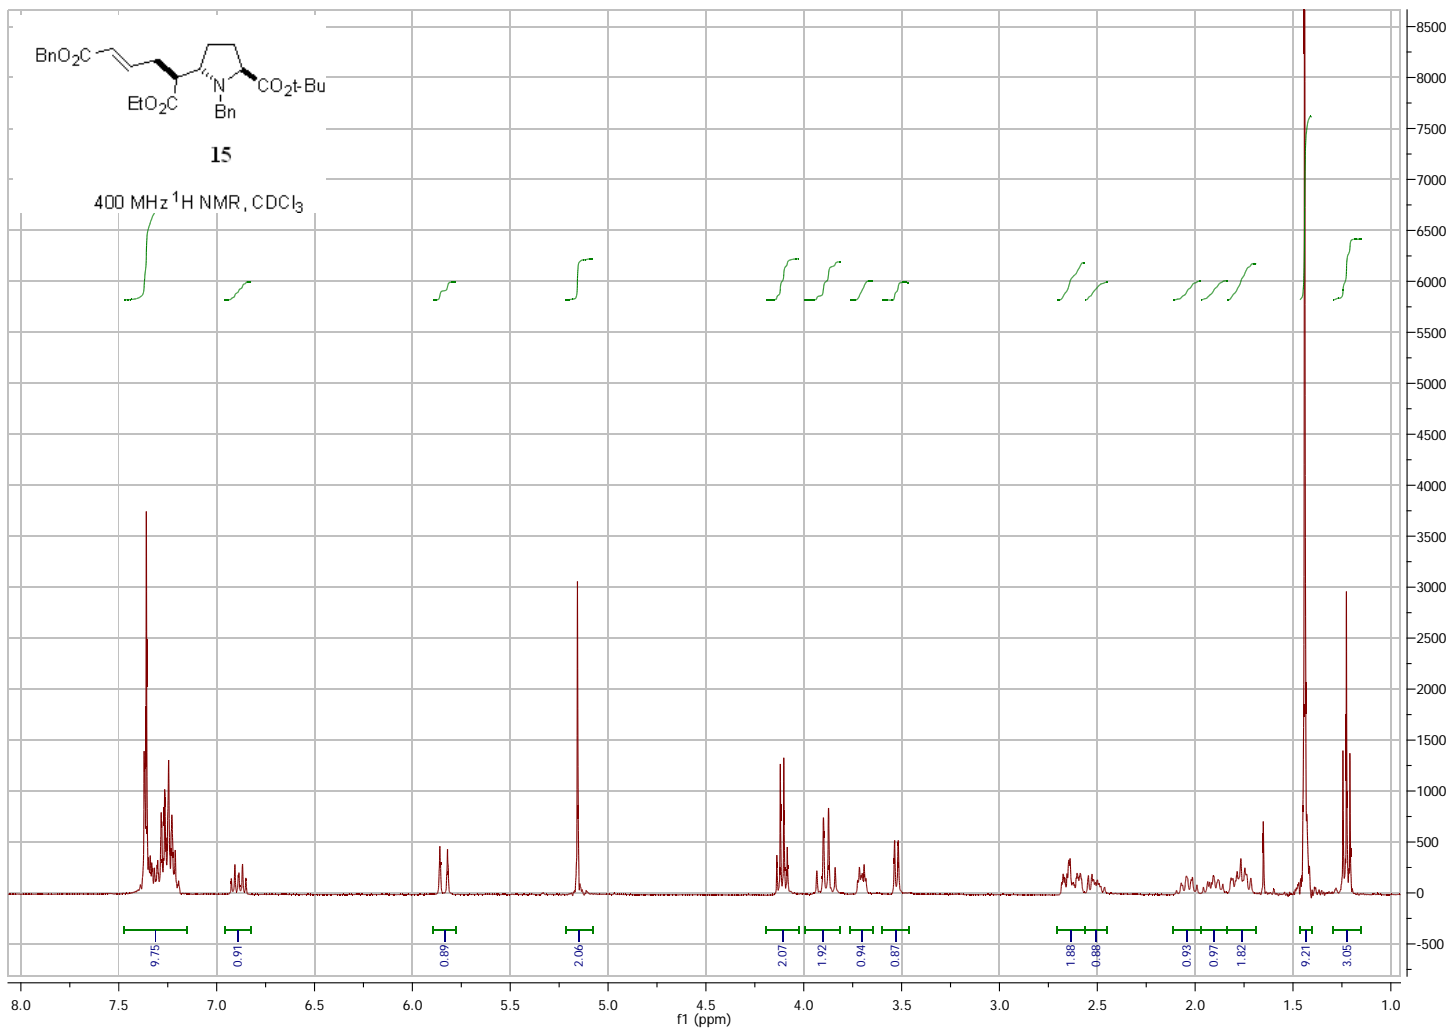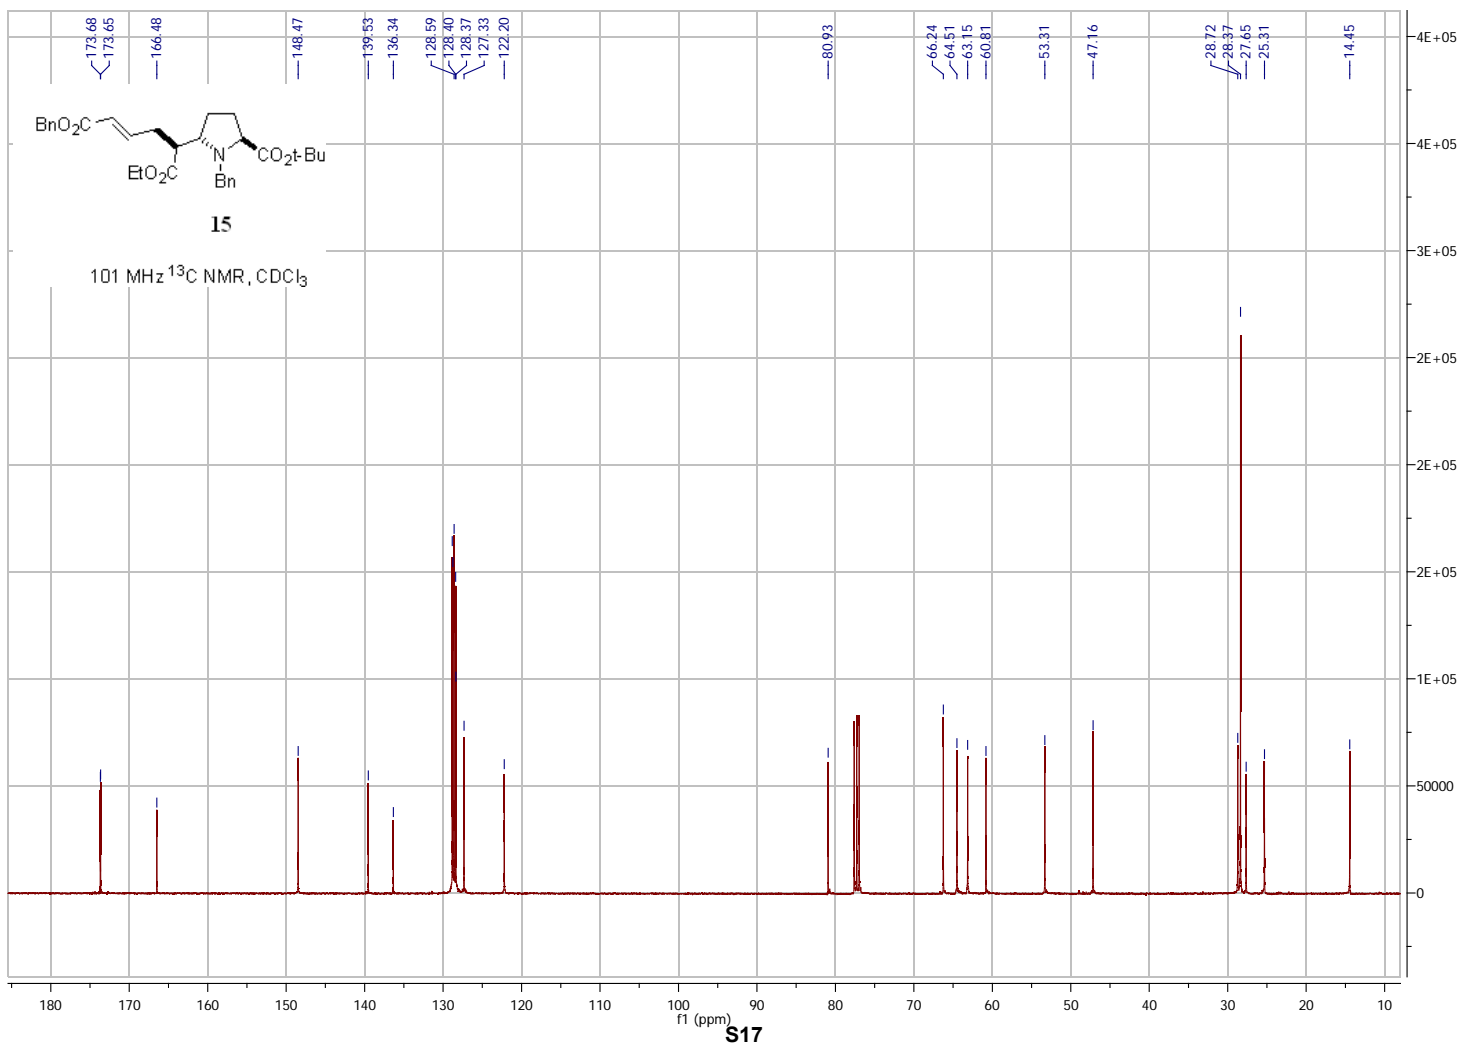

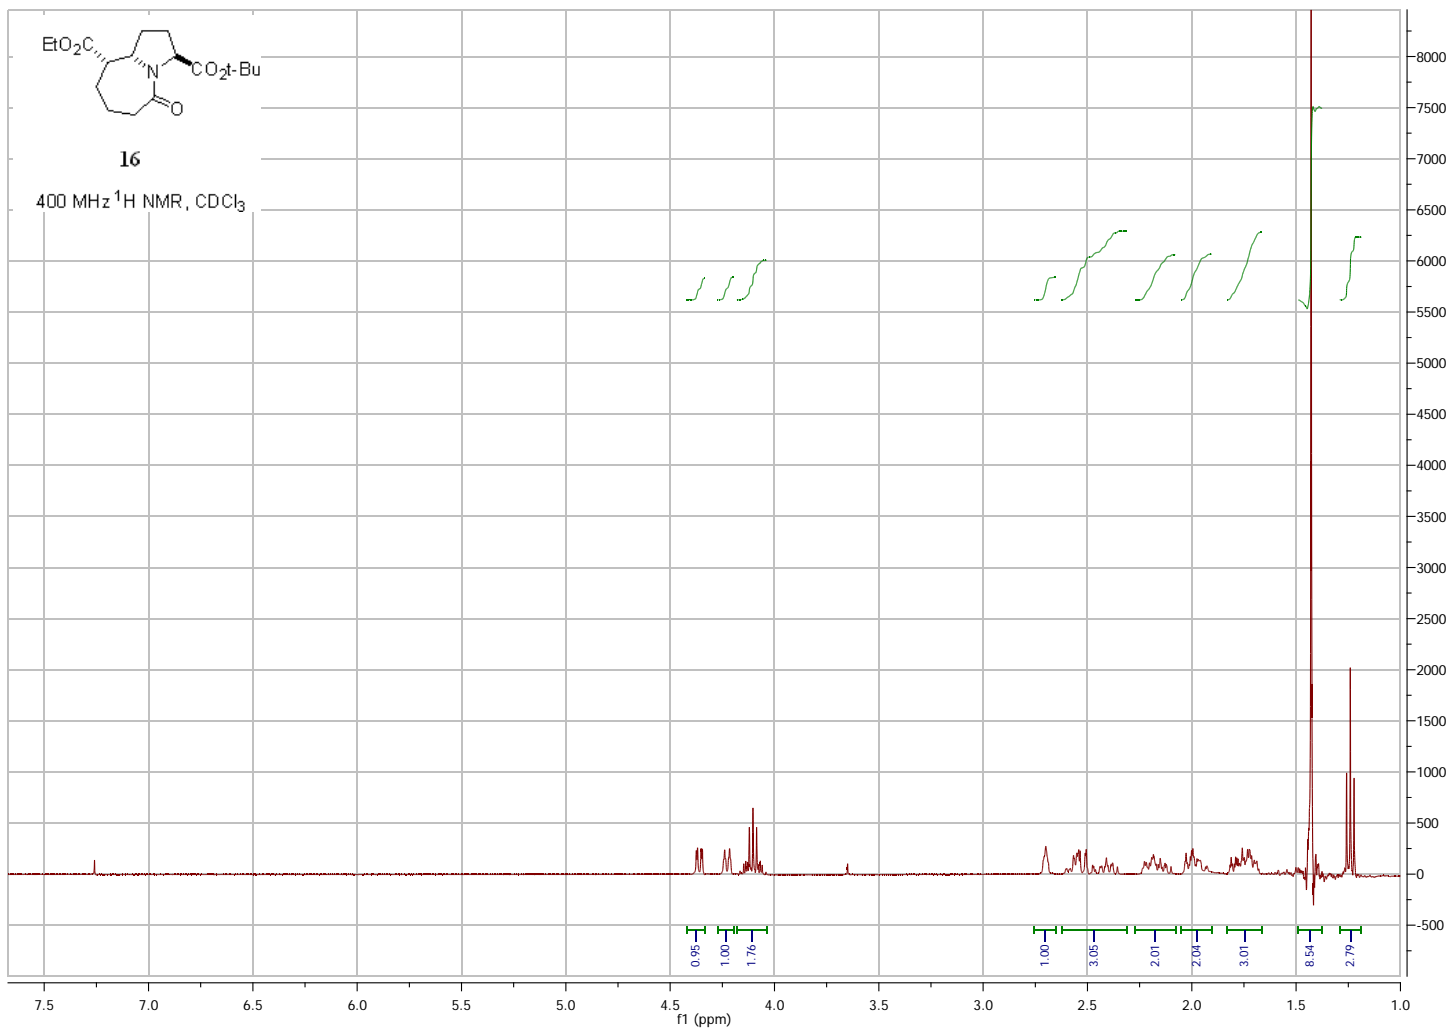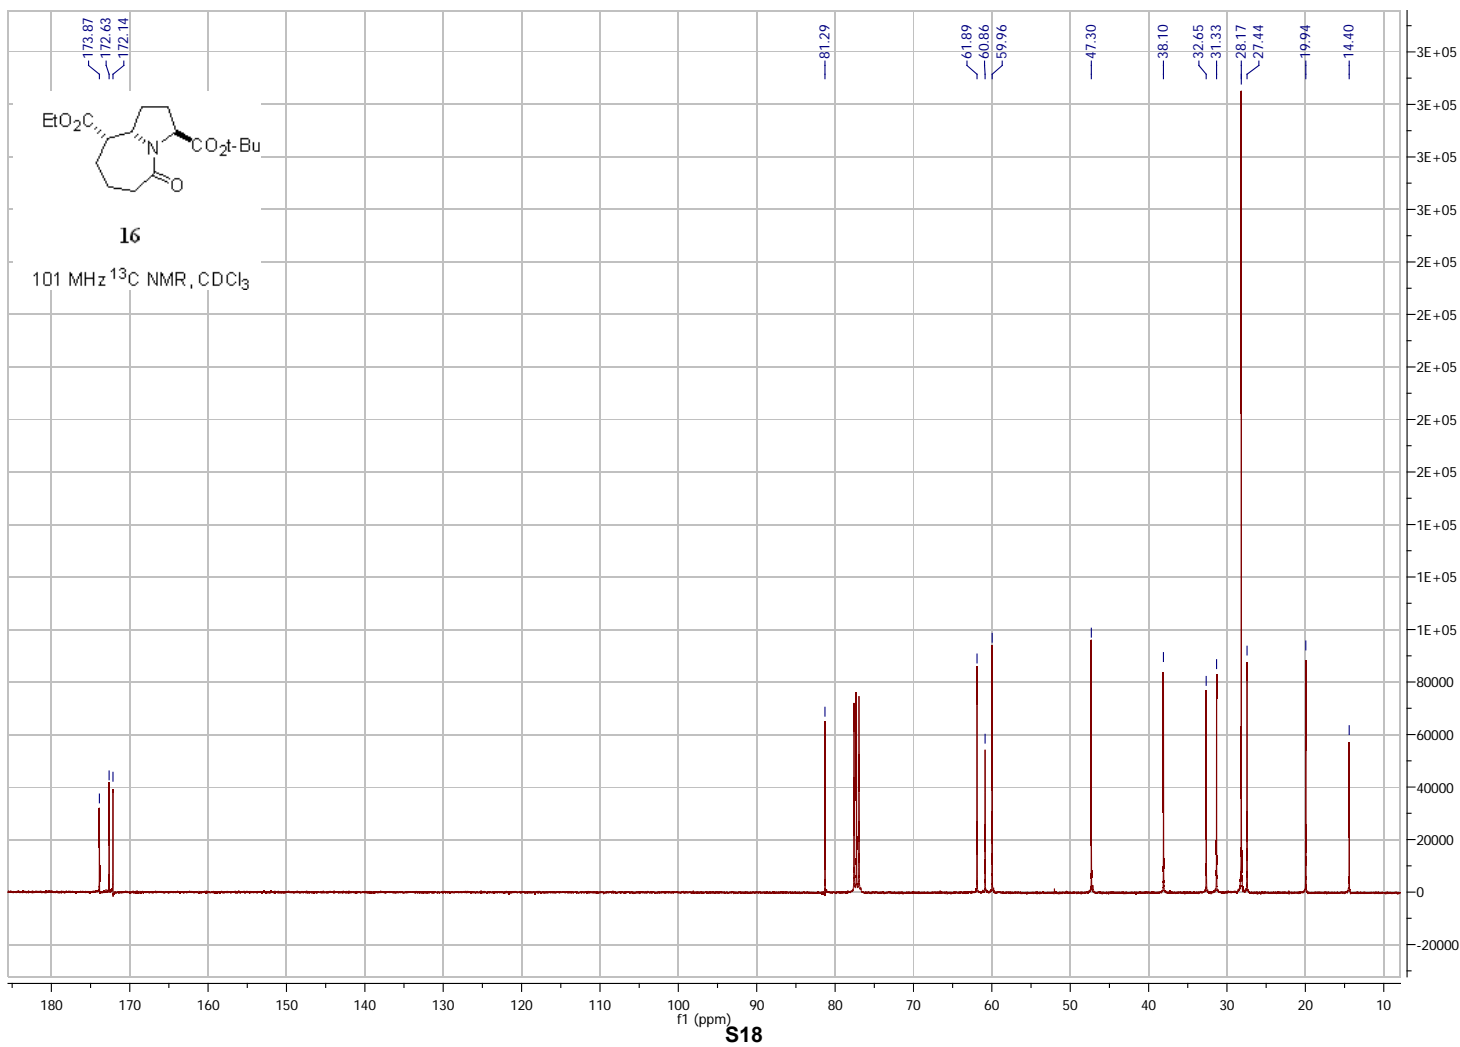

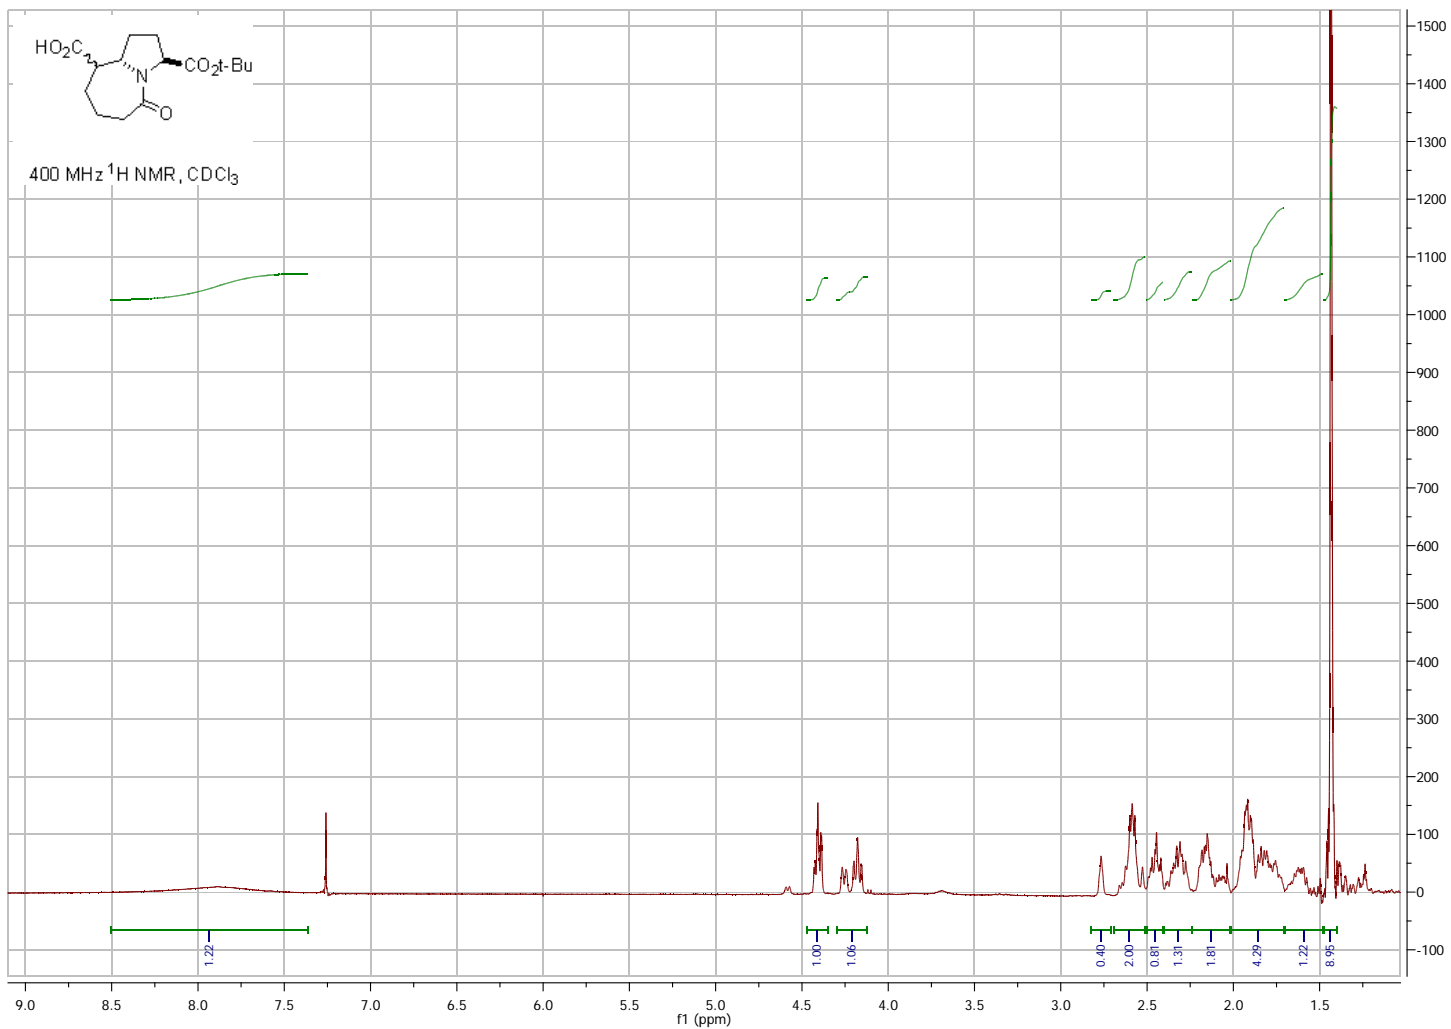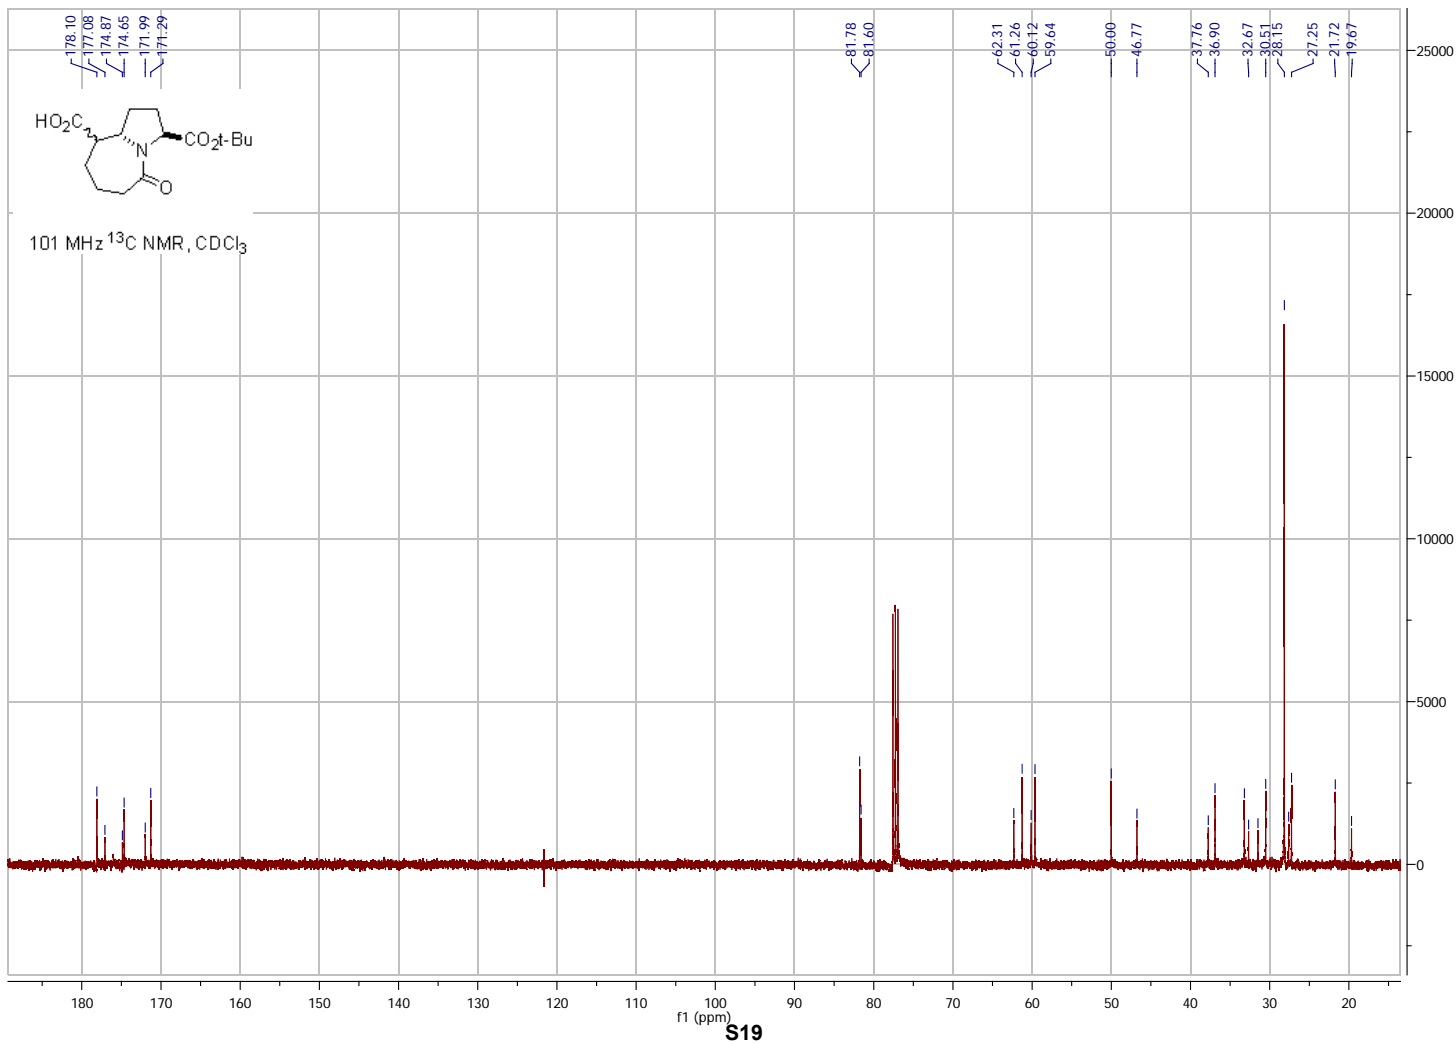

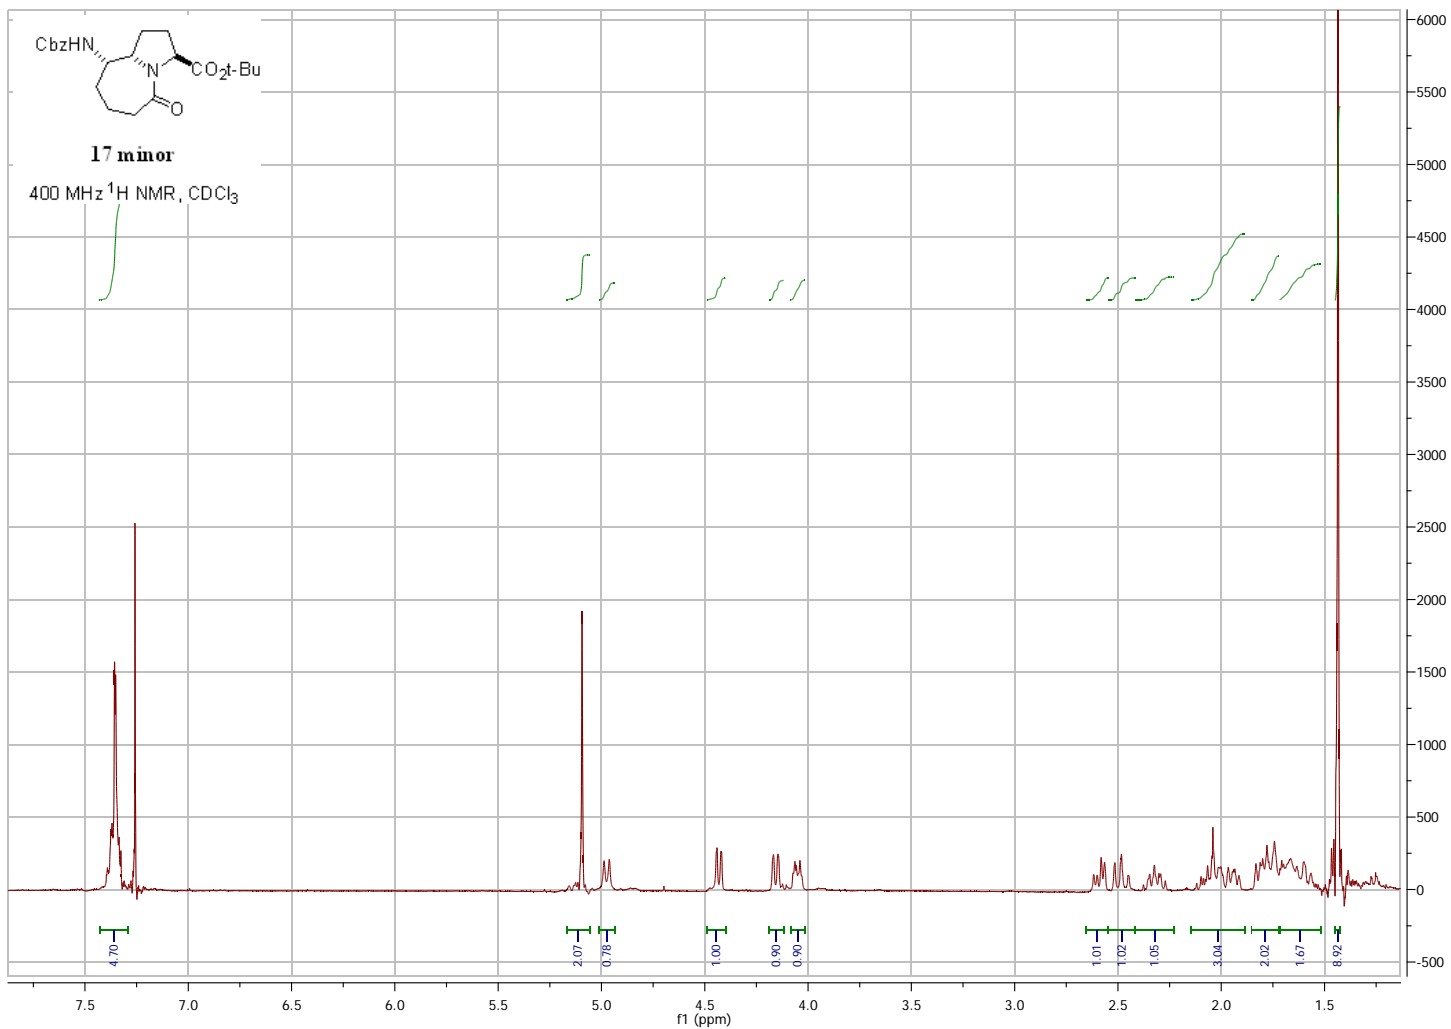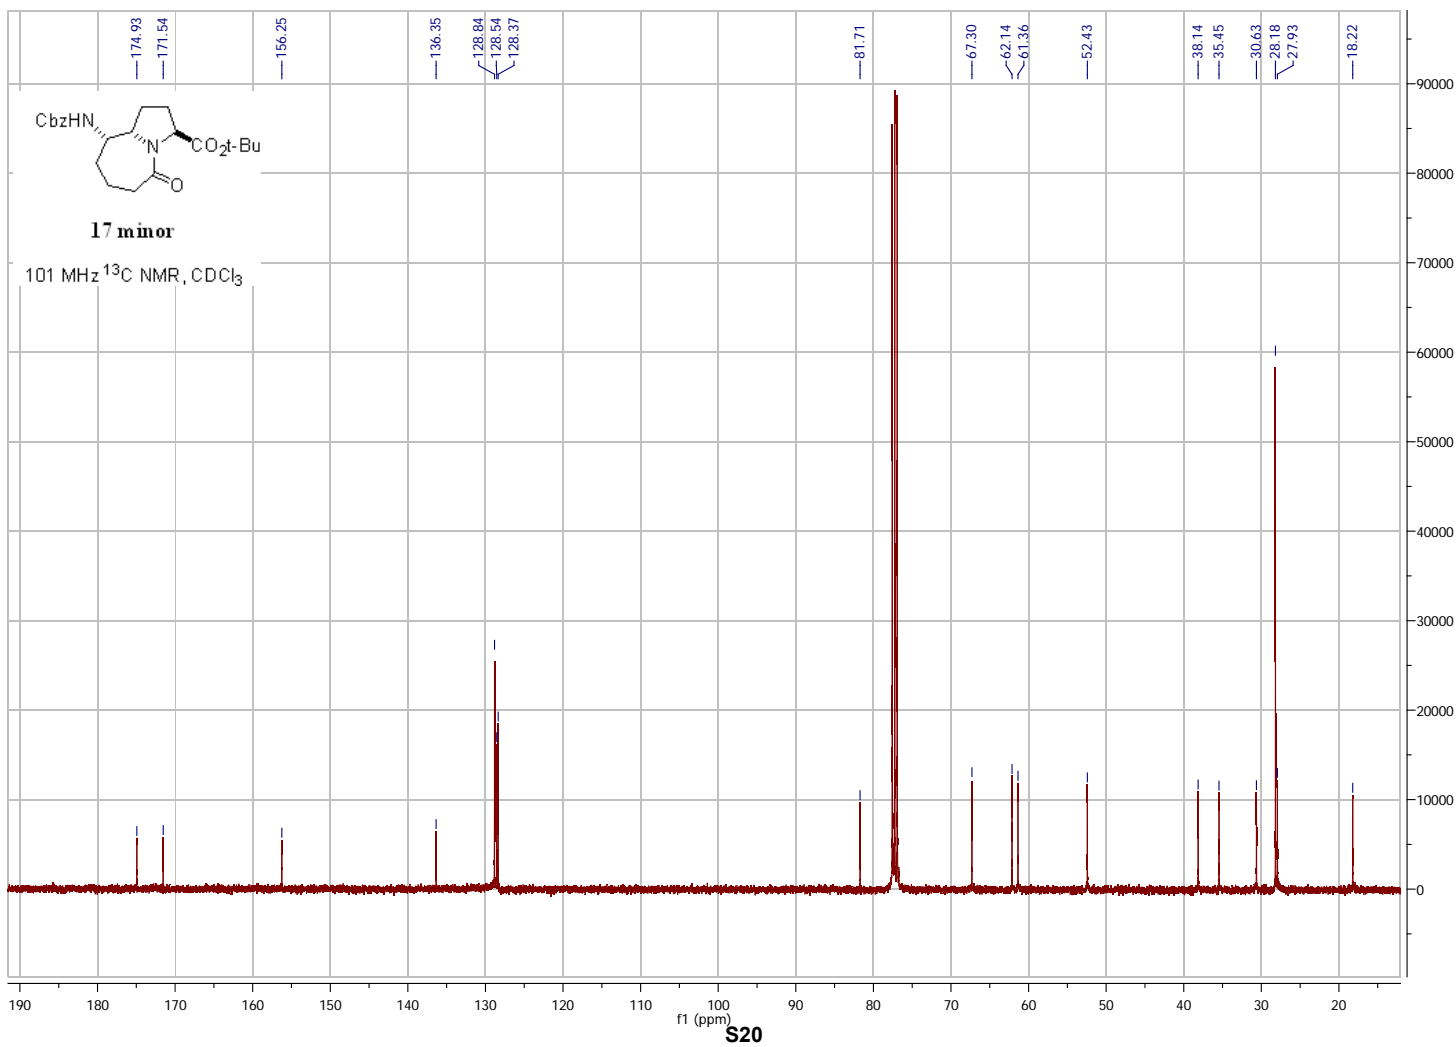



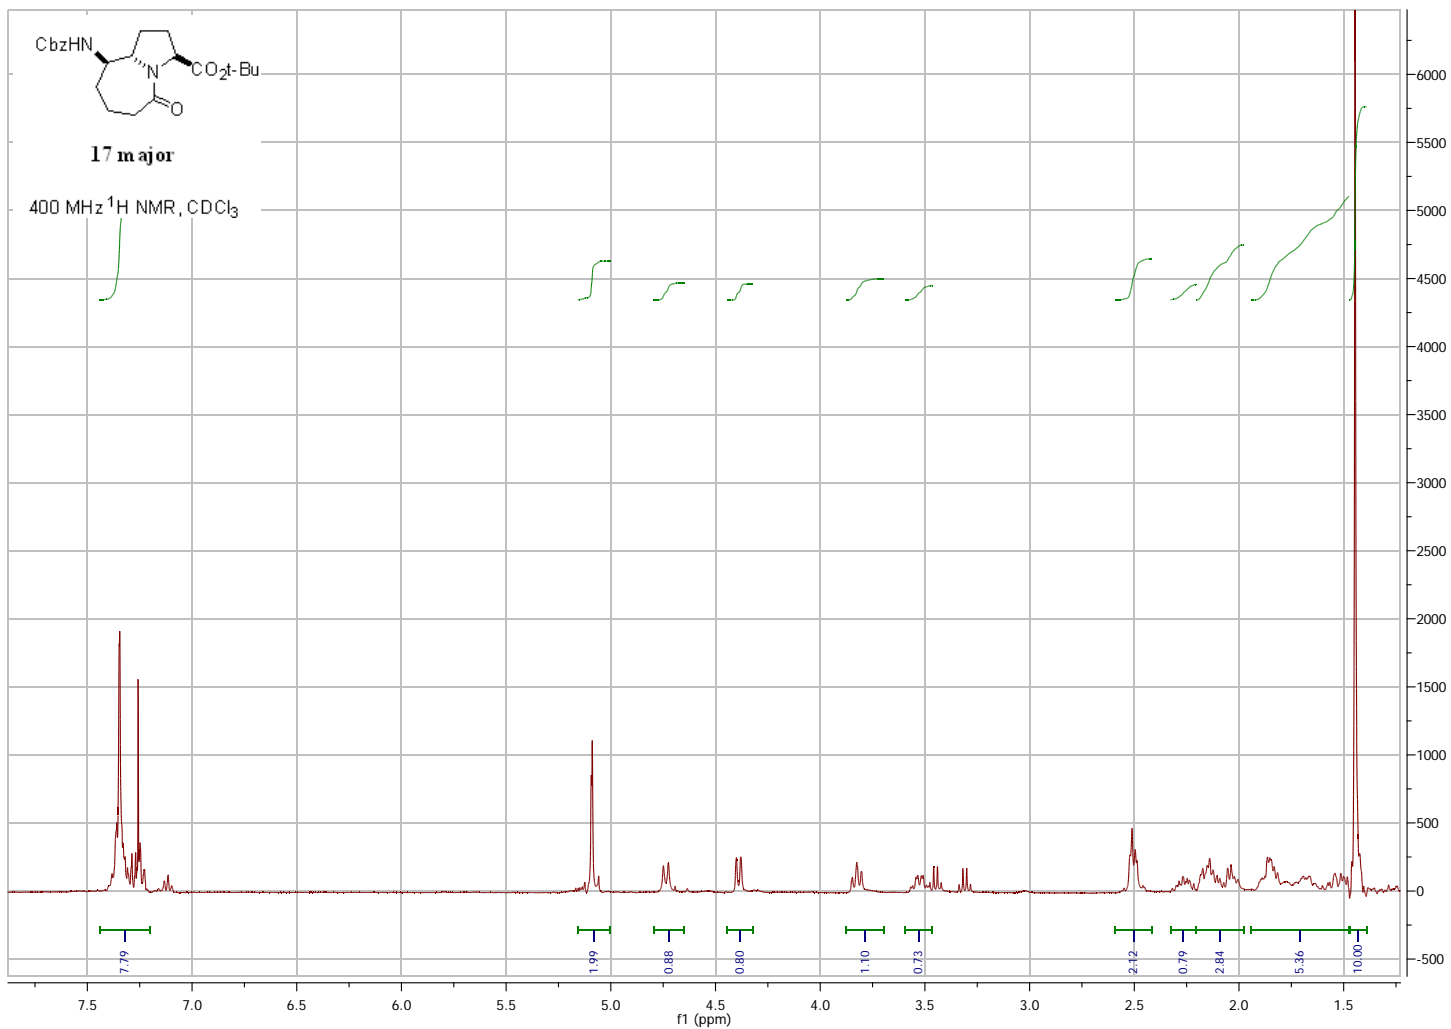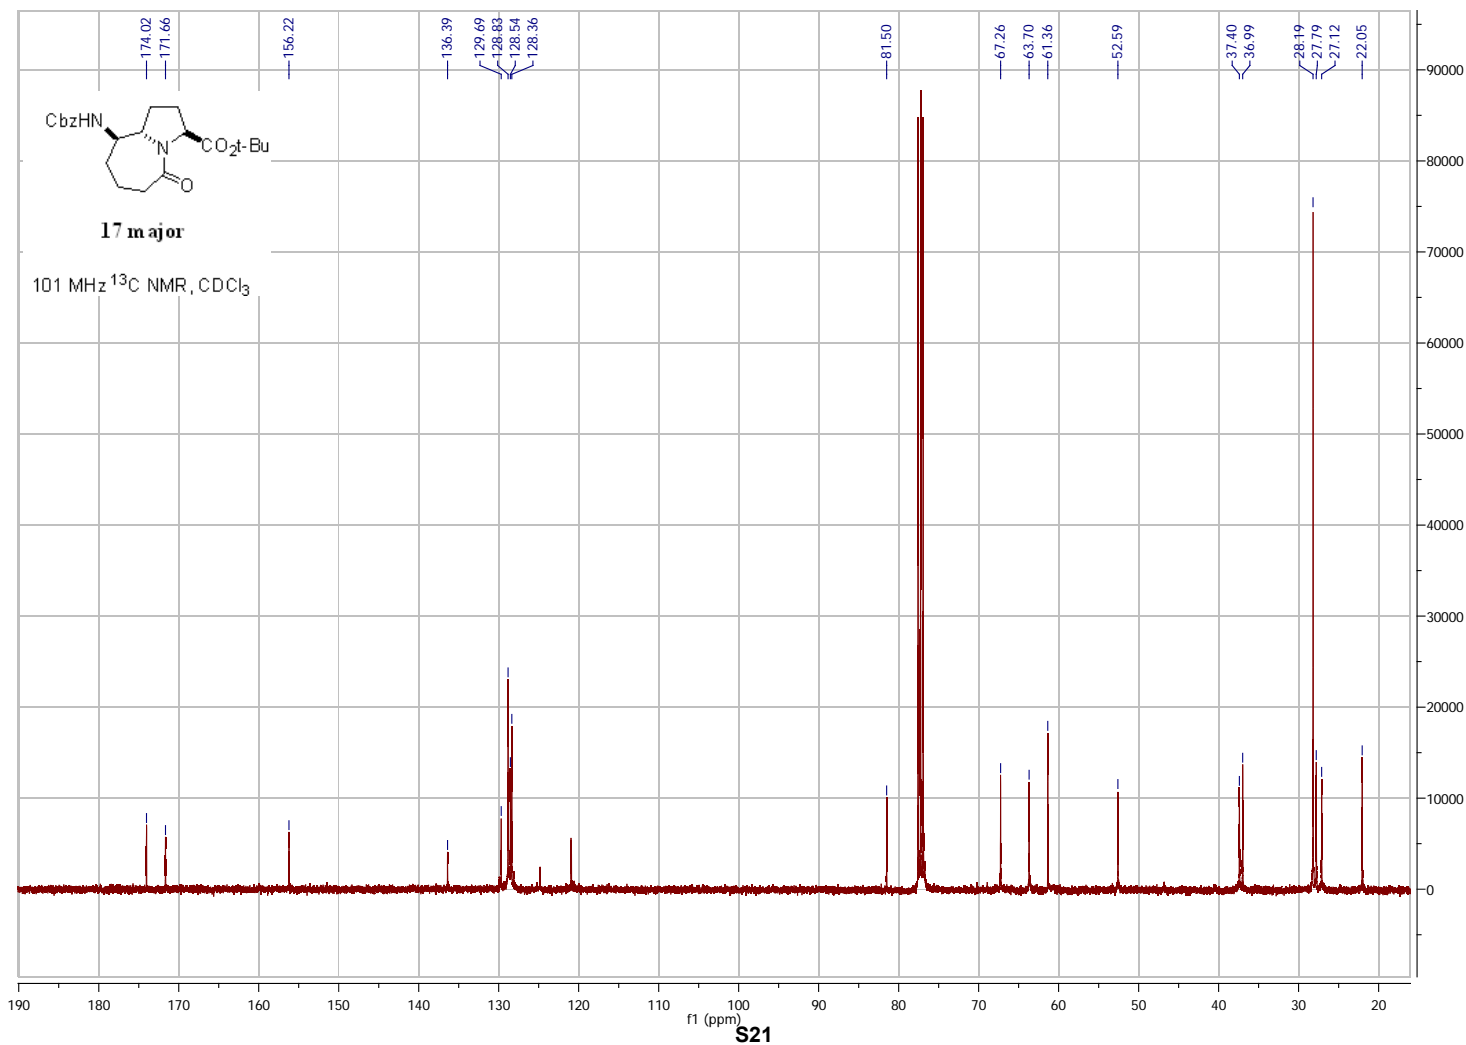

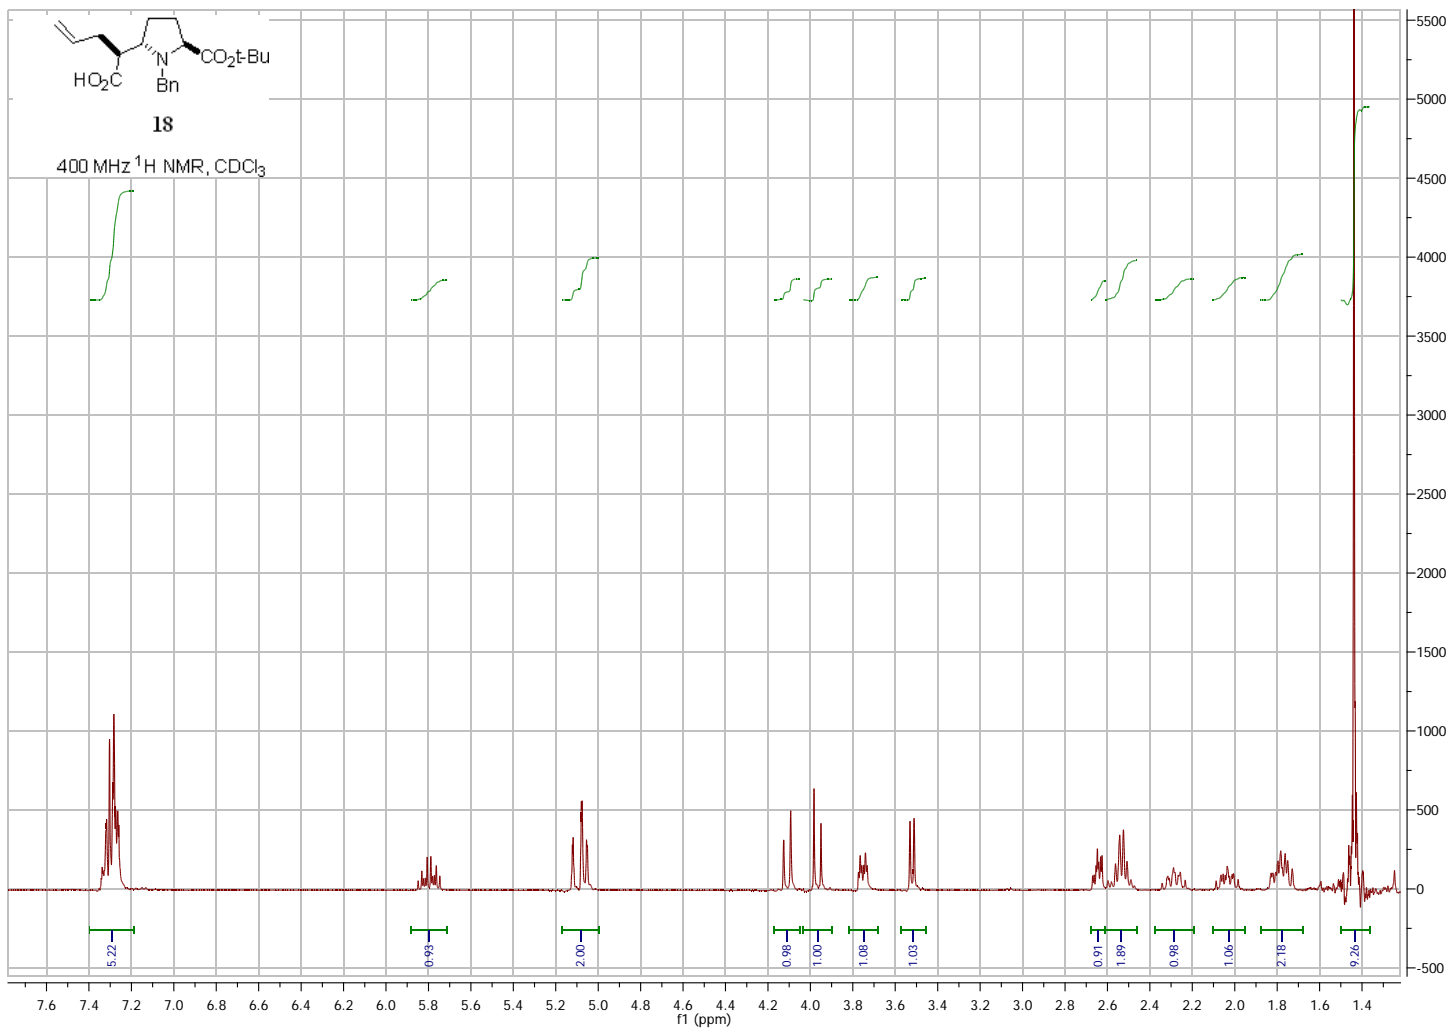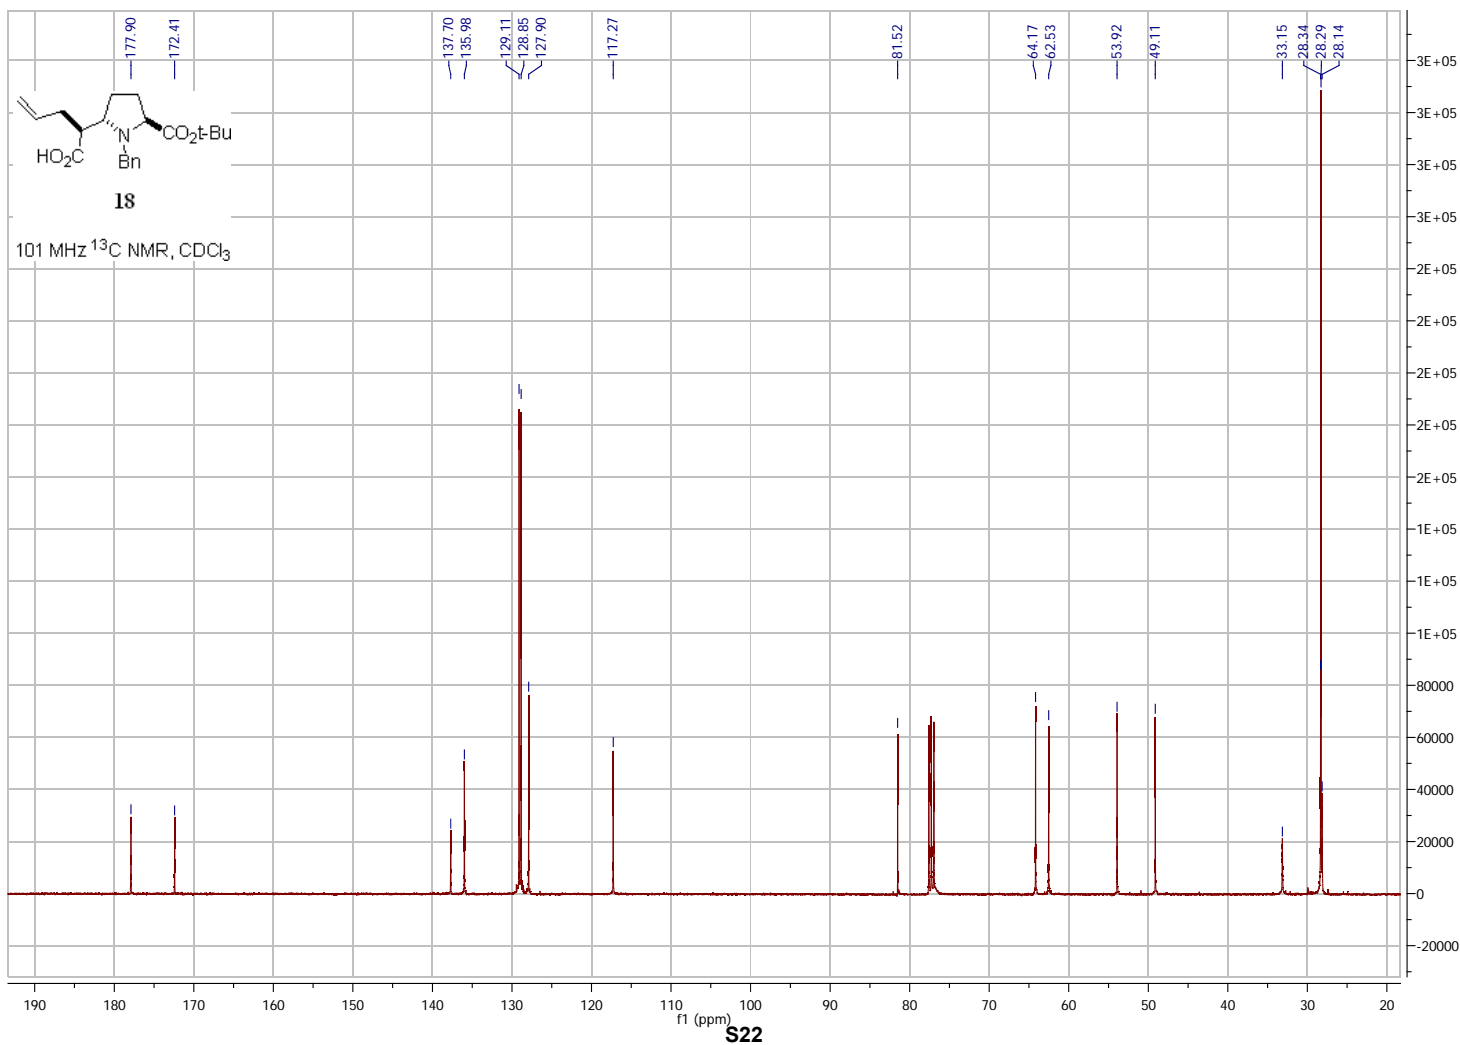

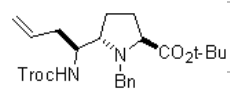

**19**

400 MHz <sup>1</sup>H NMR, CDCl<sub>3</sub>

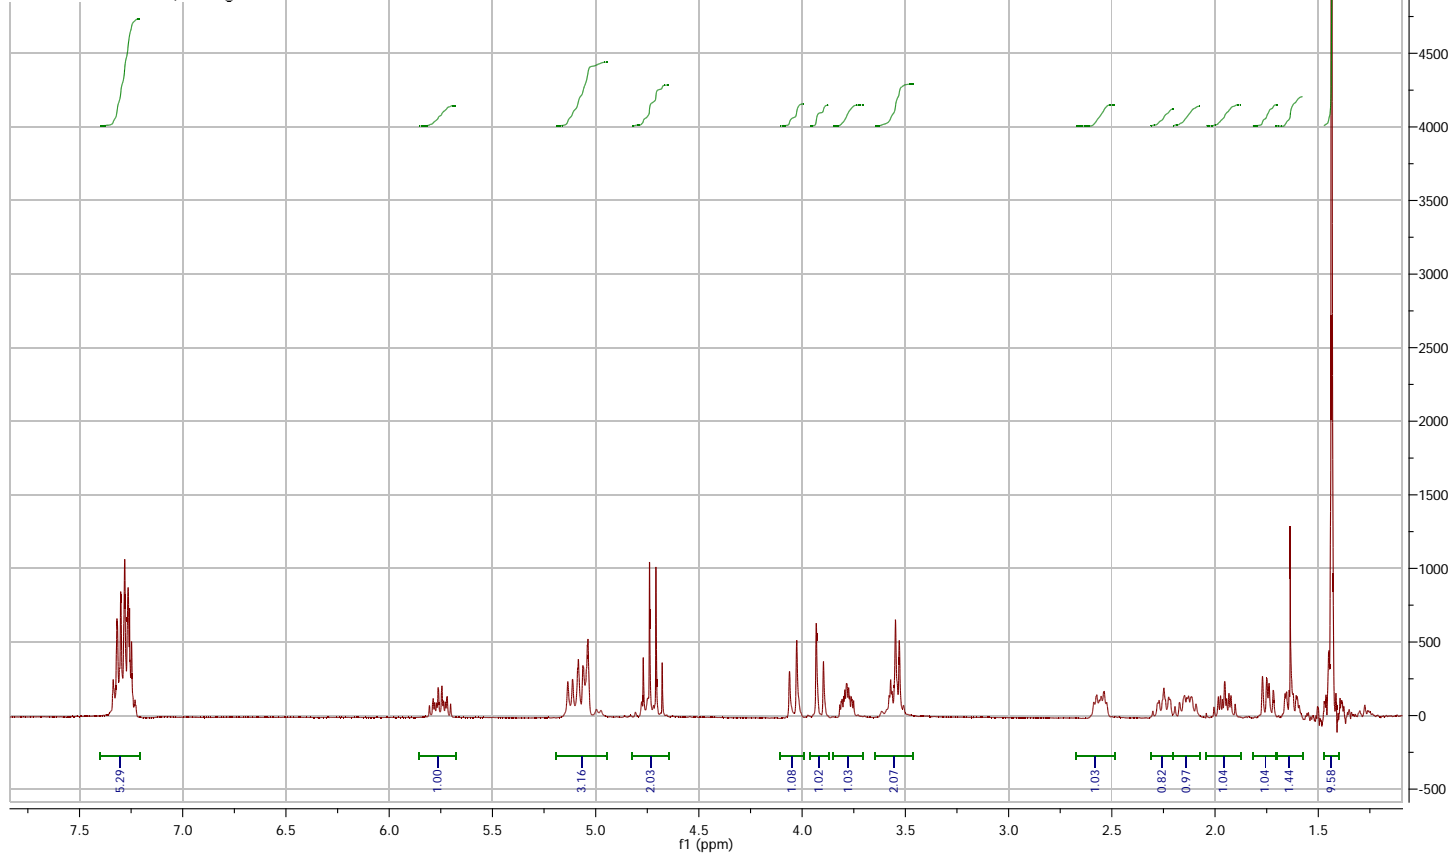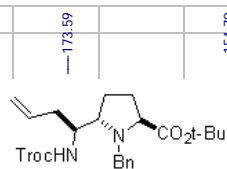

**19**

101 MHz <sup>13</sup>C NMR, CDCl<sub>3</sub>

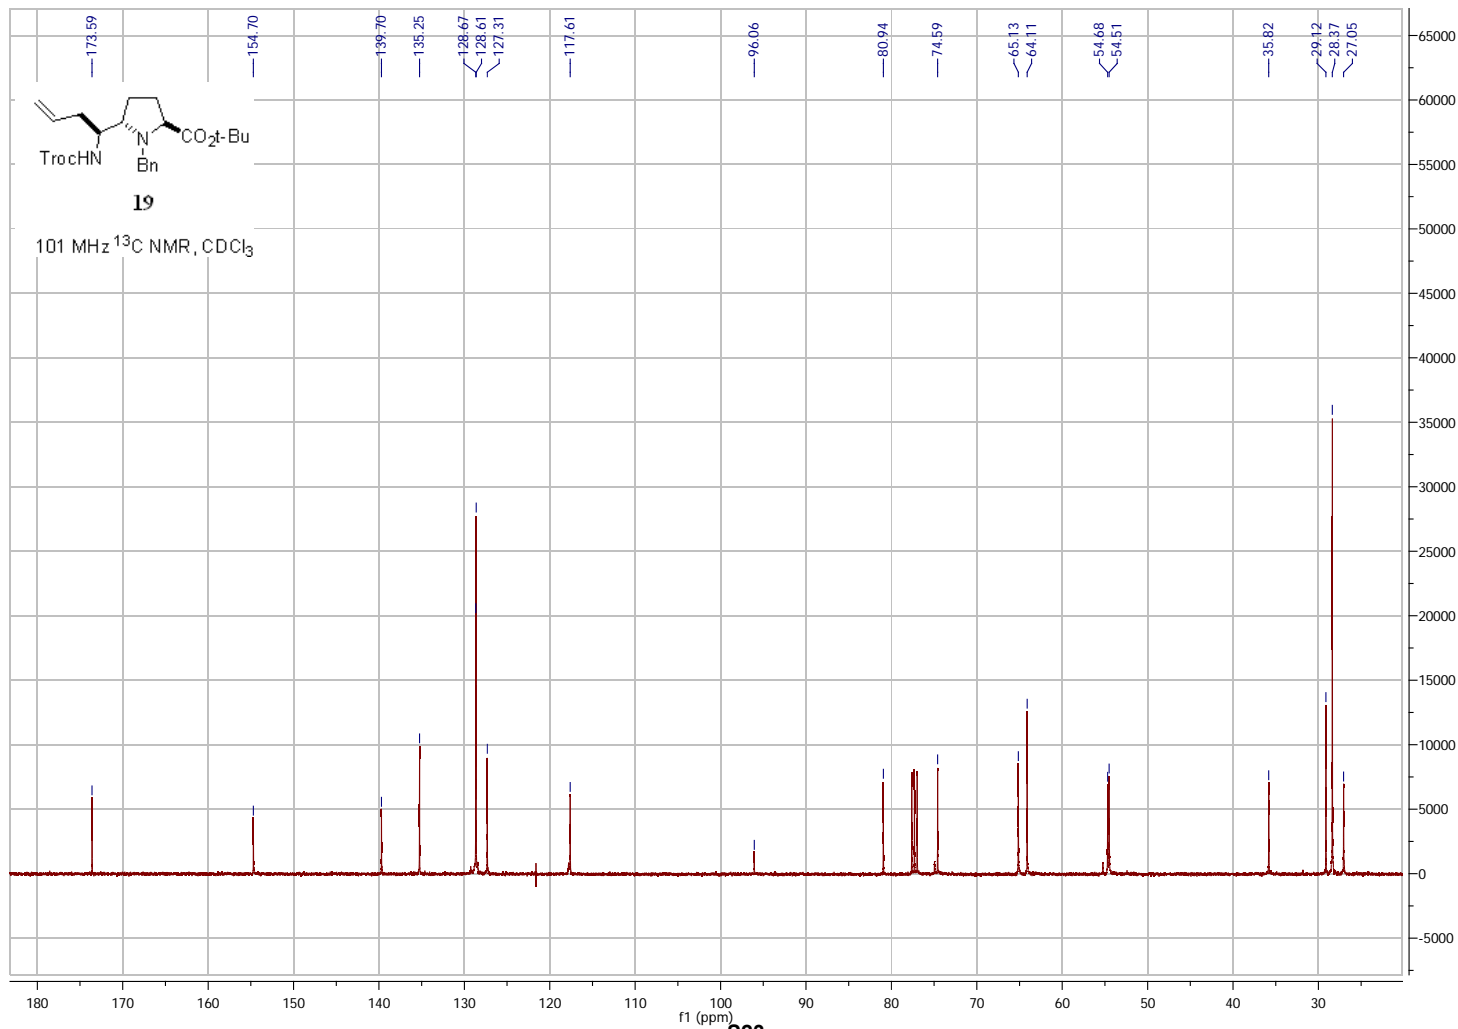

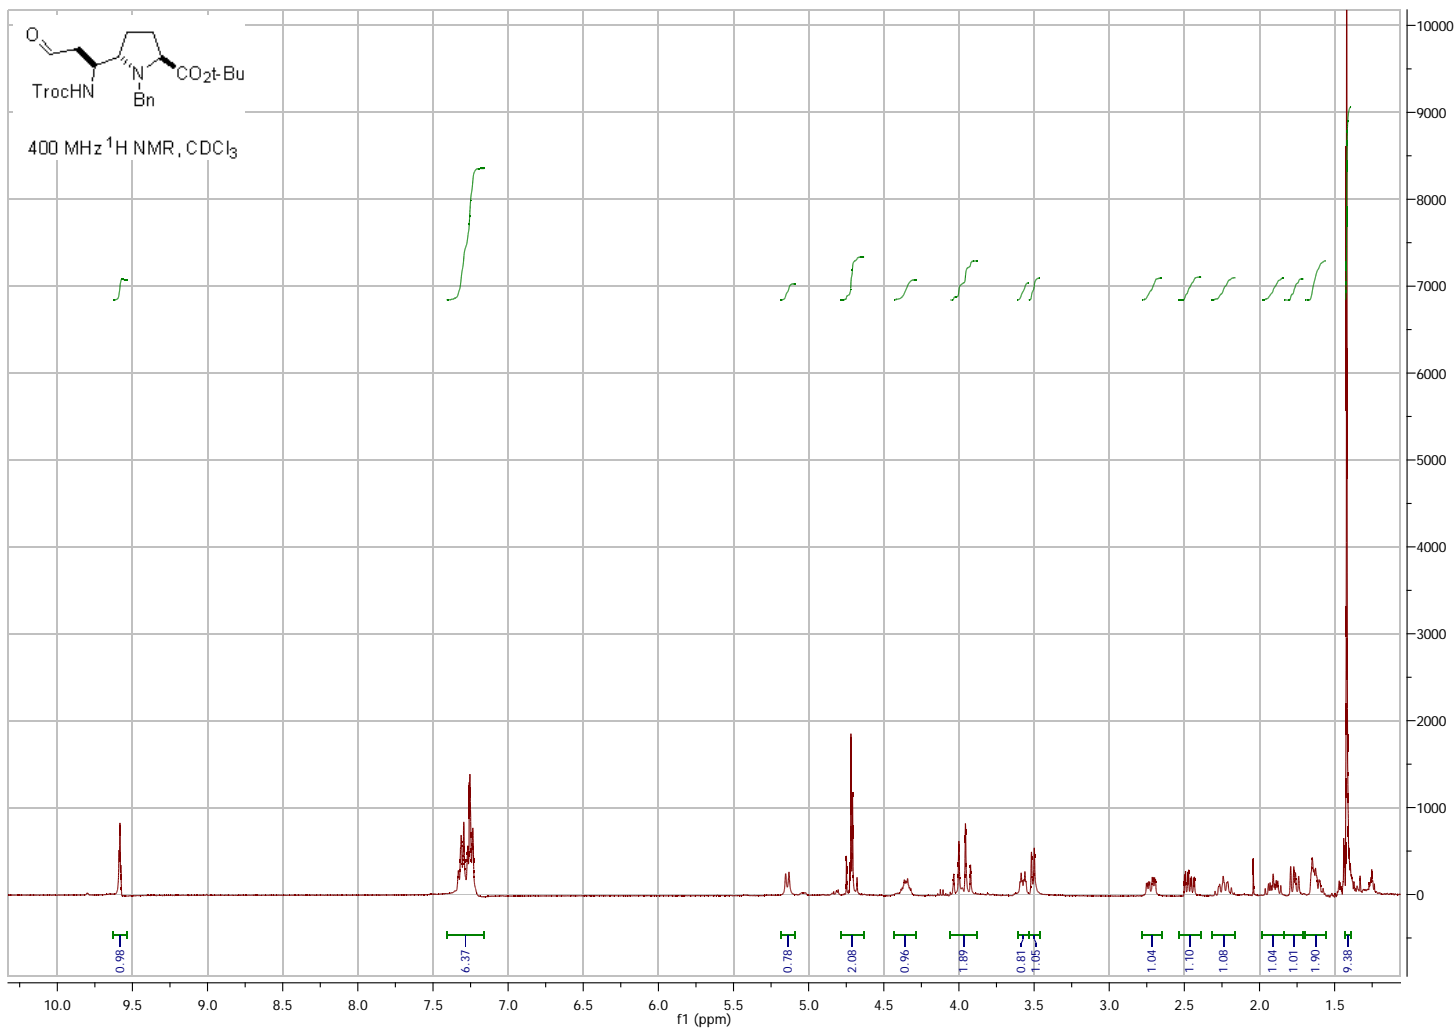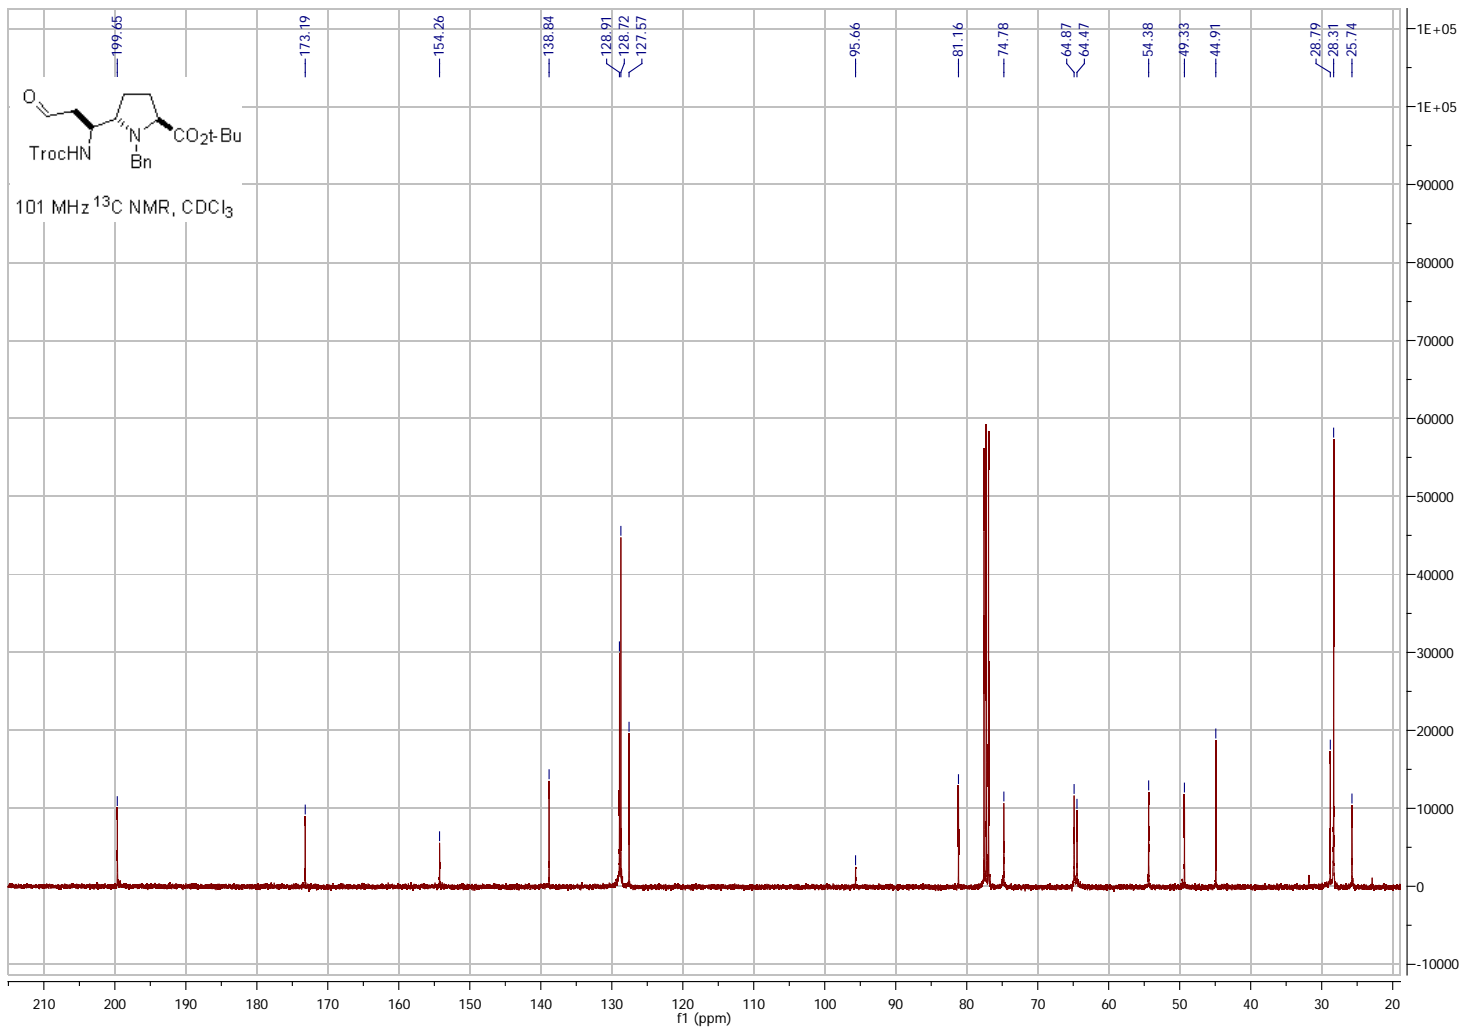

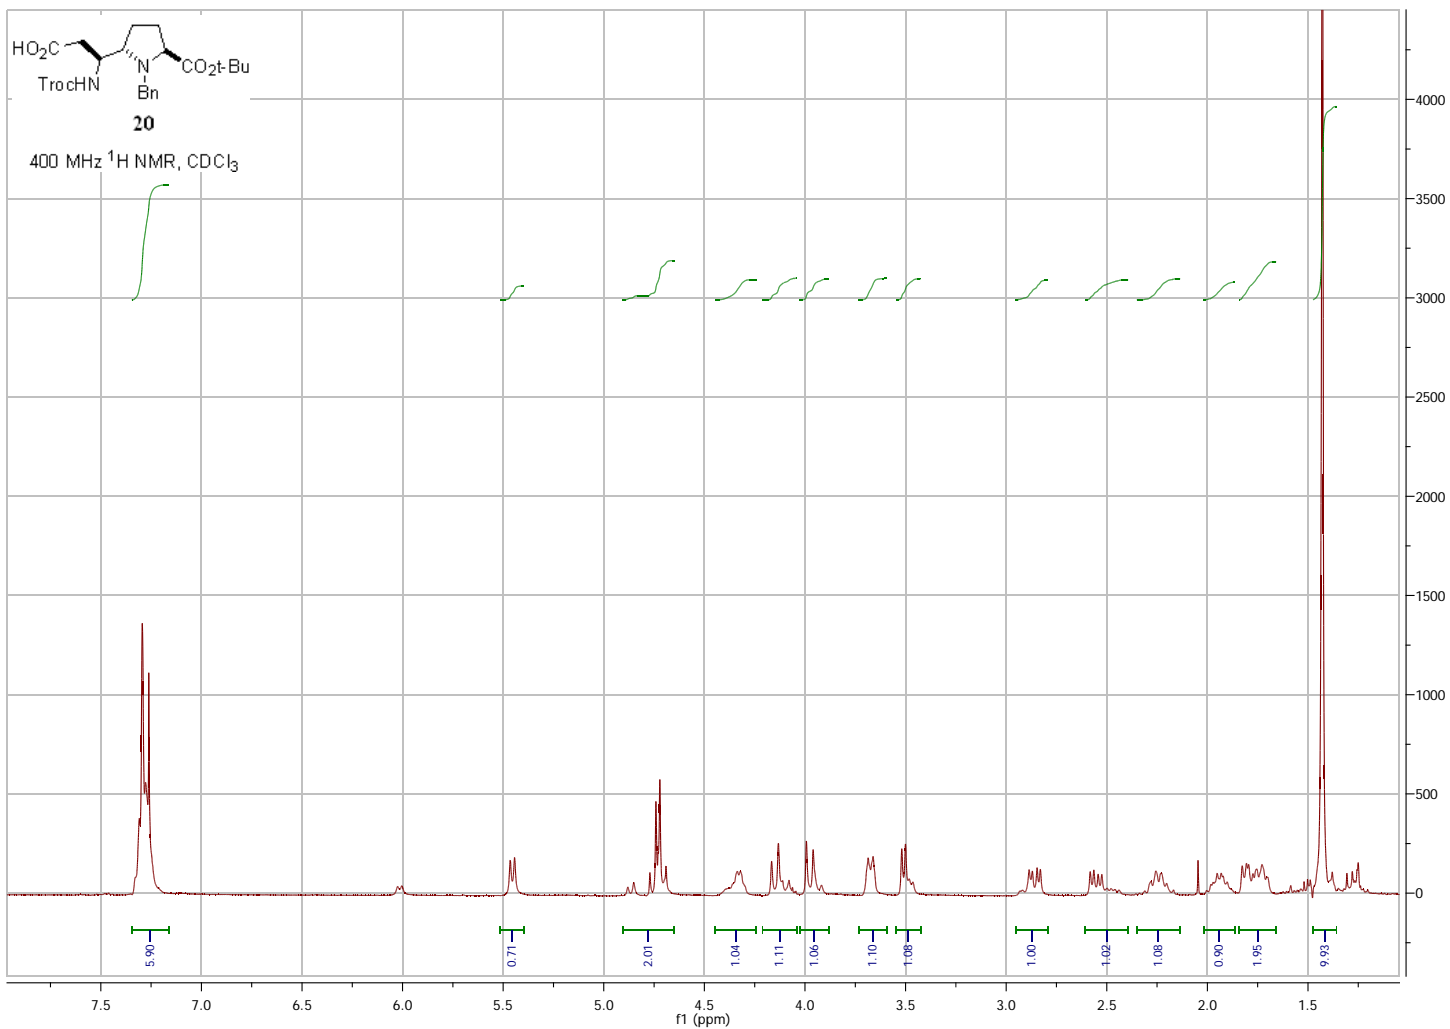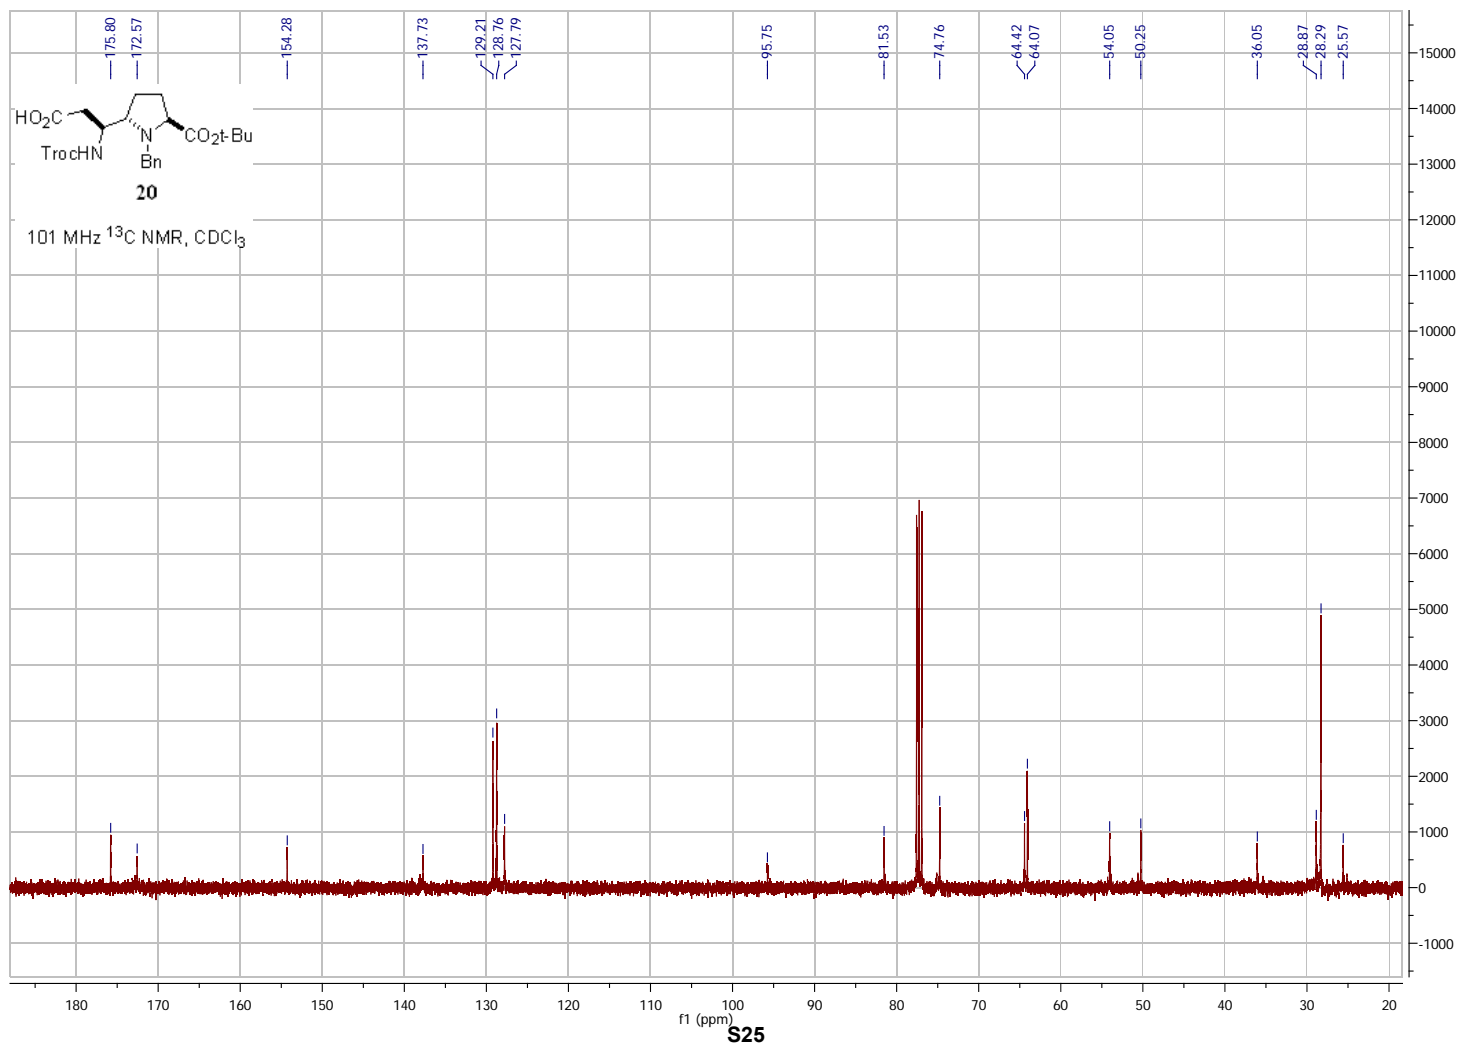

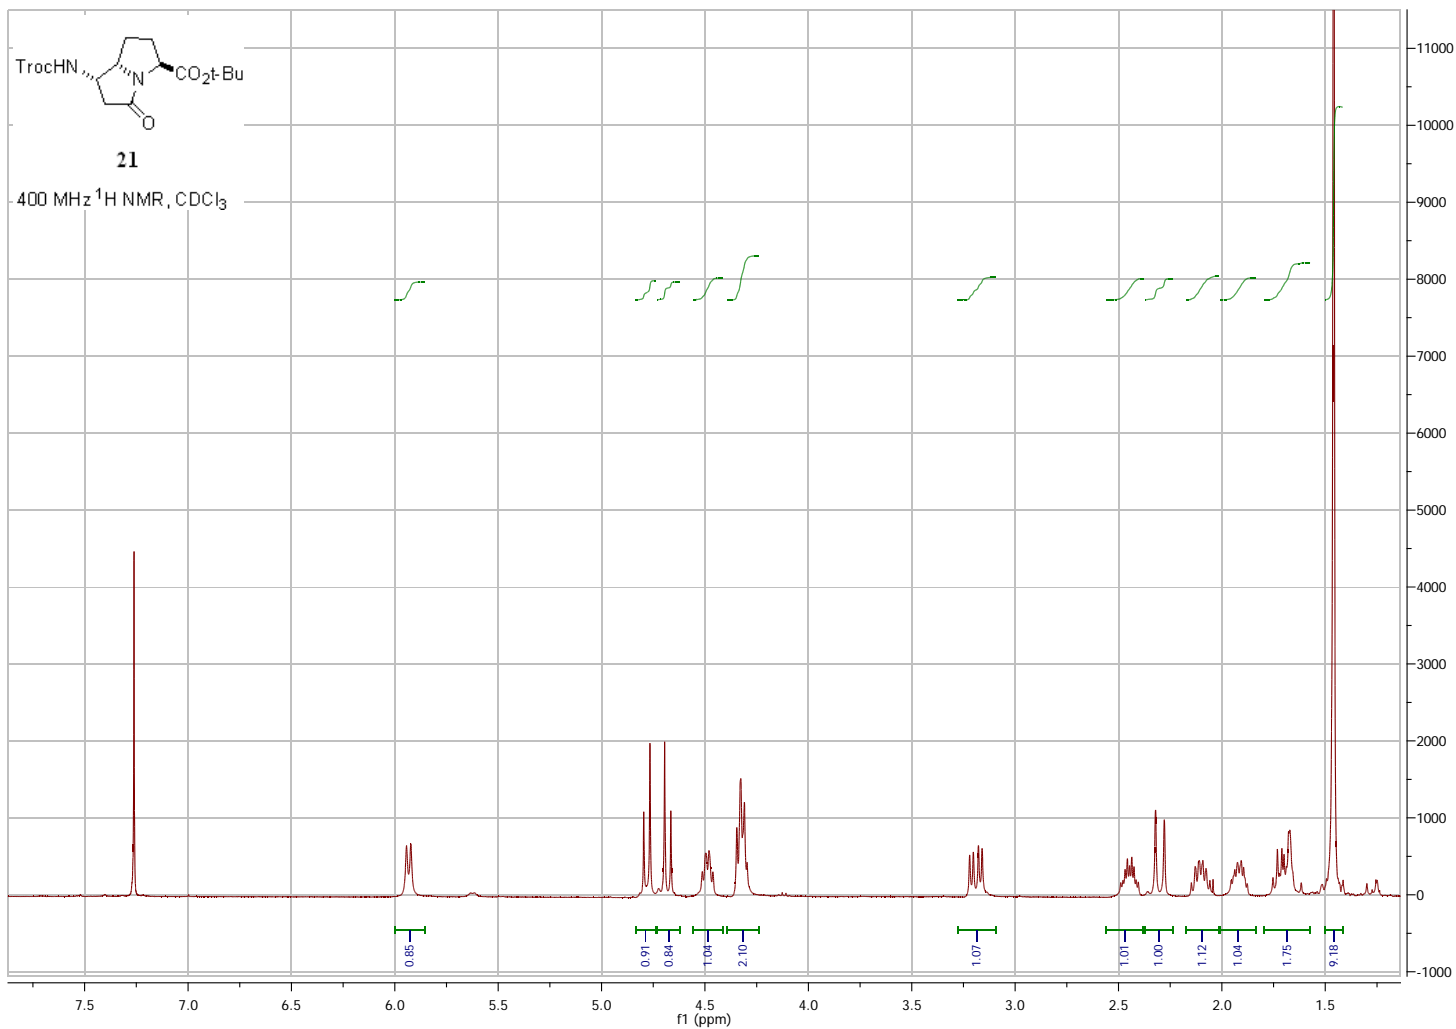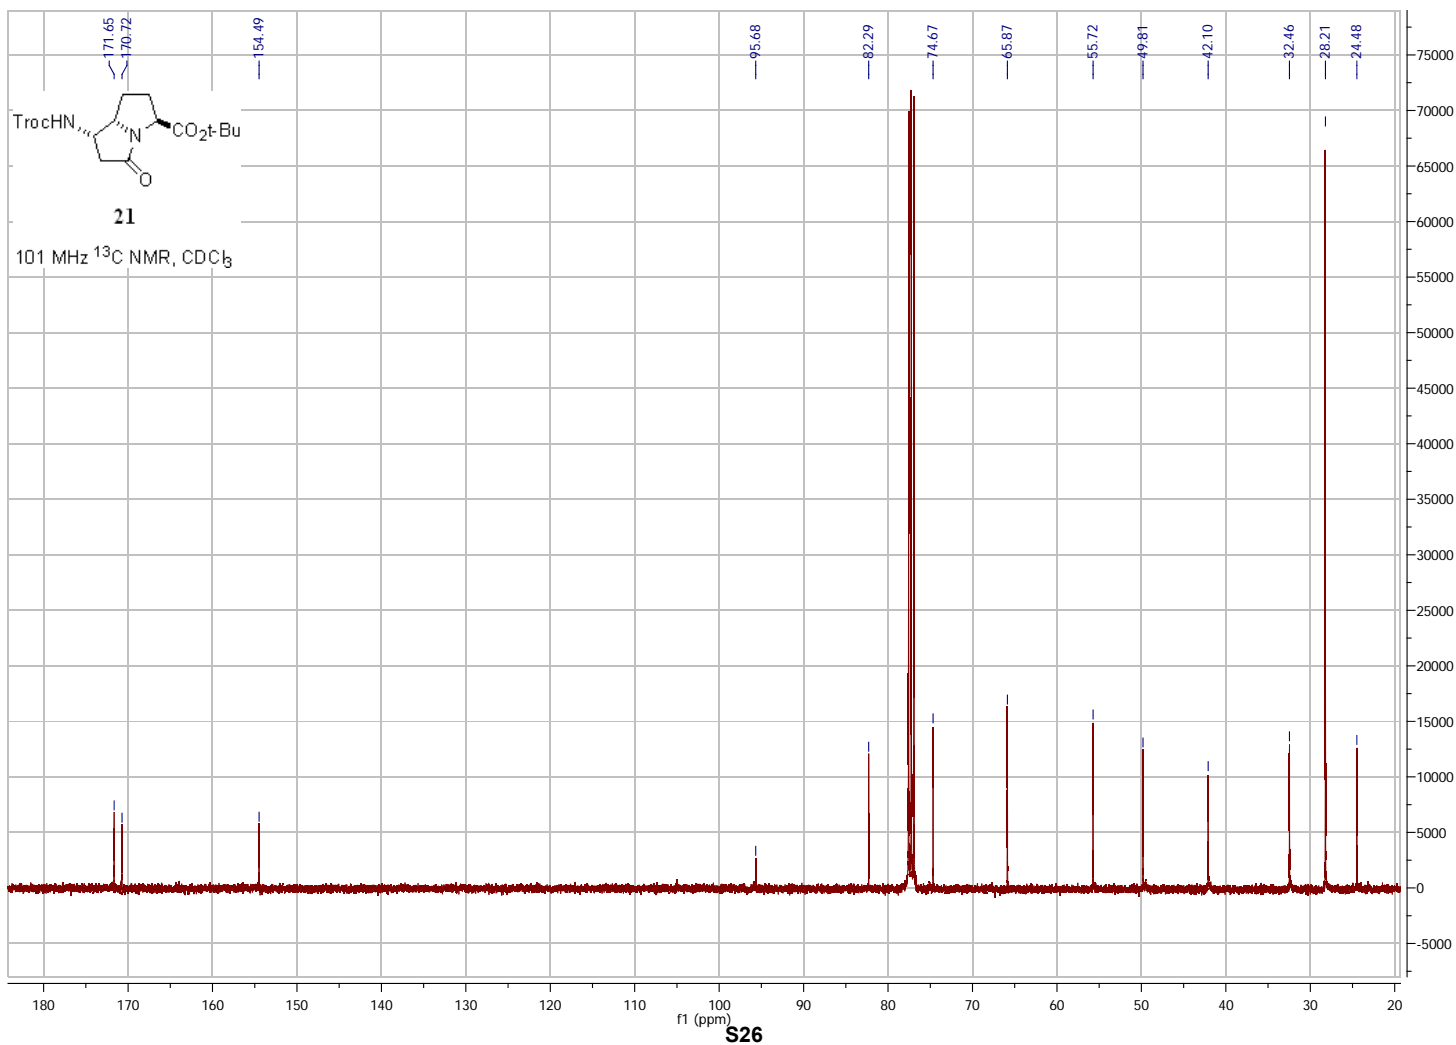

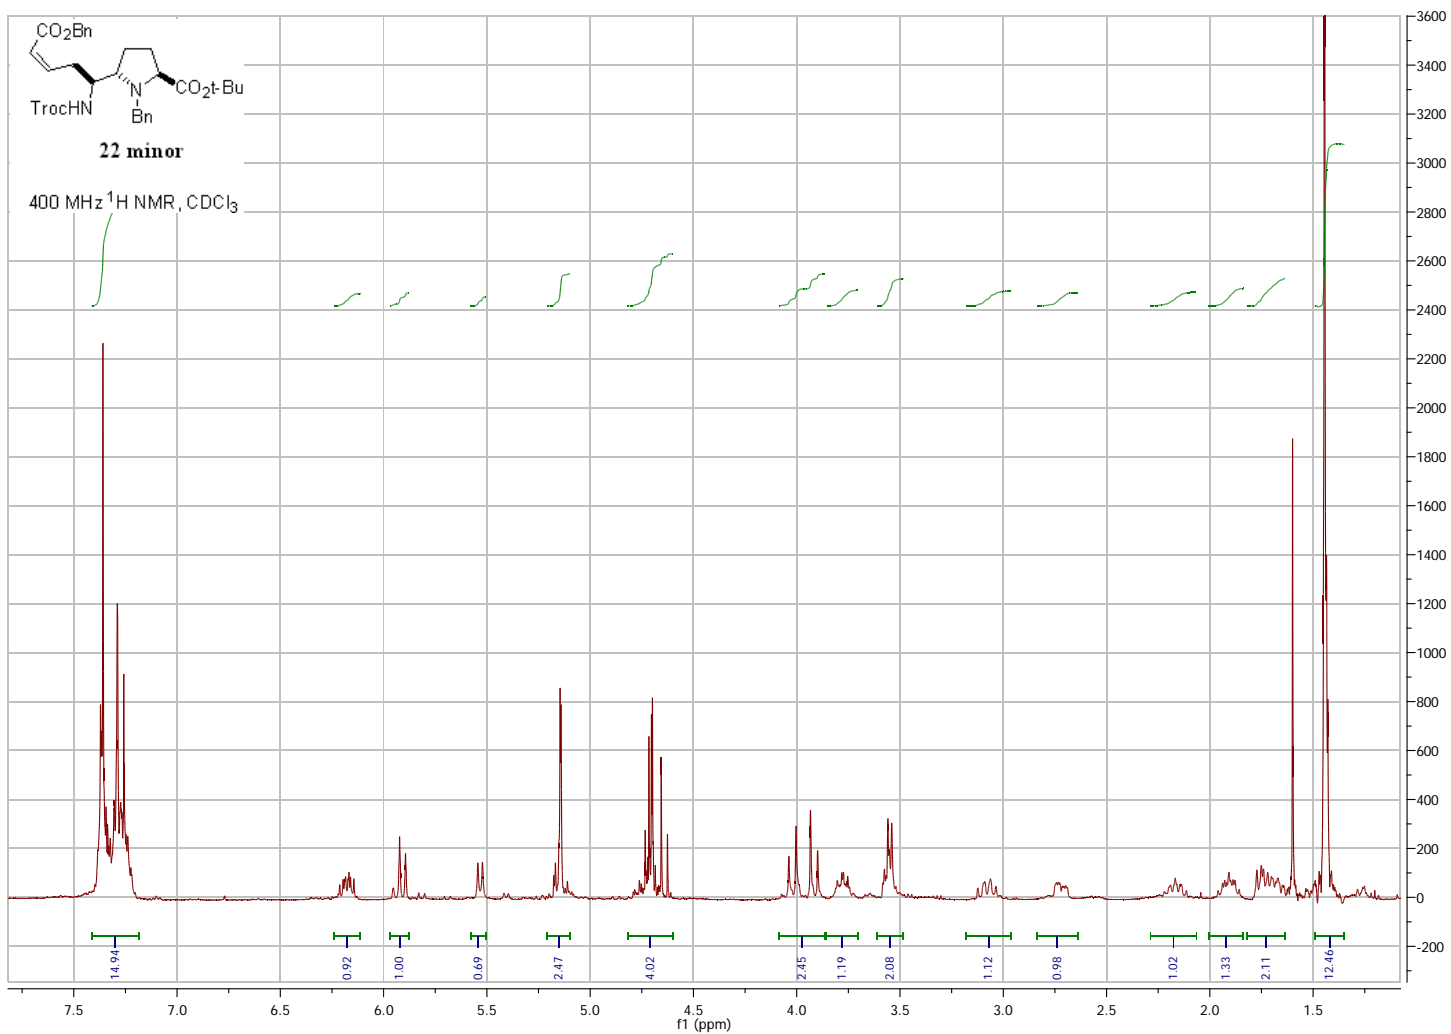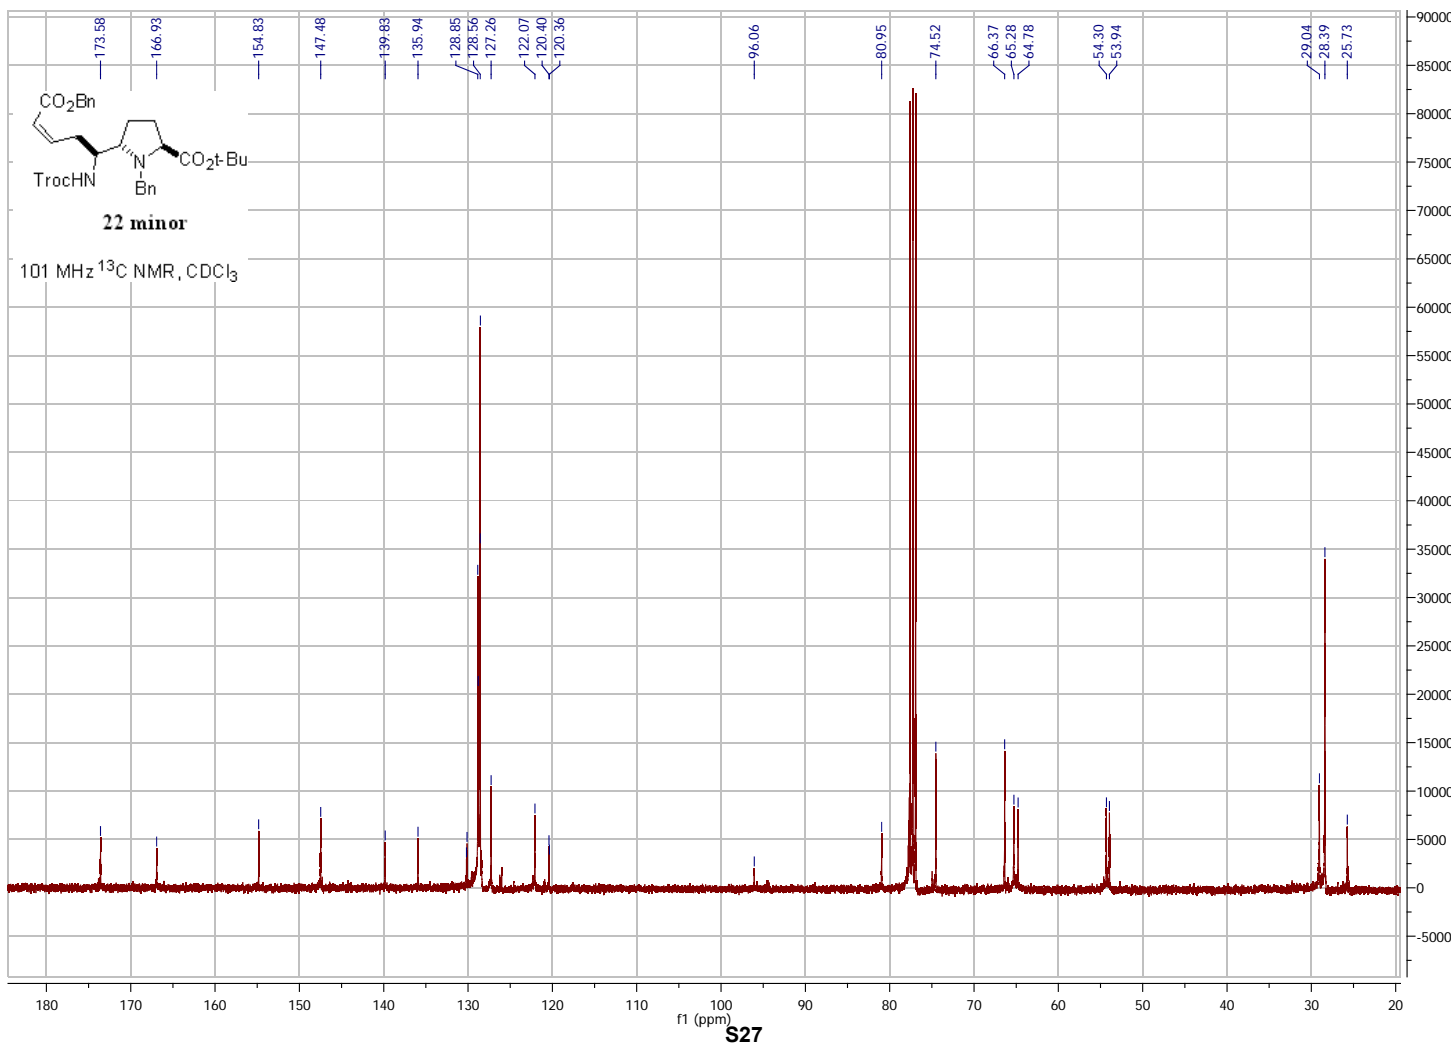

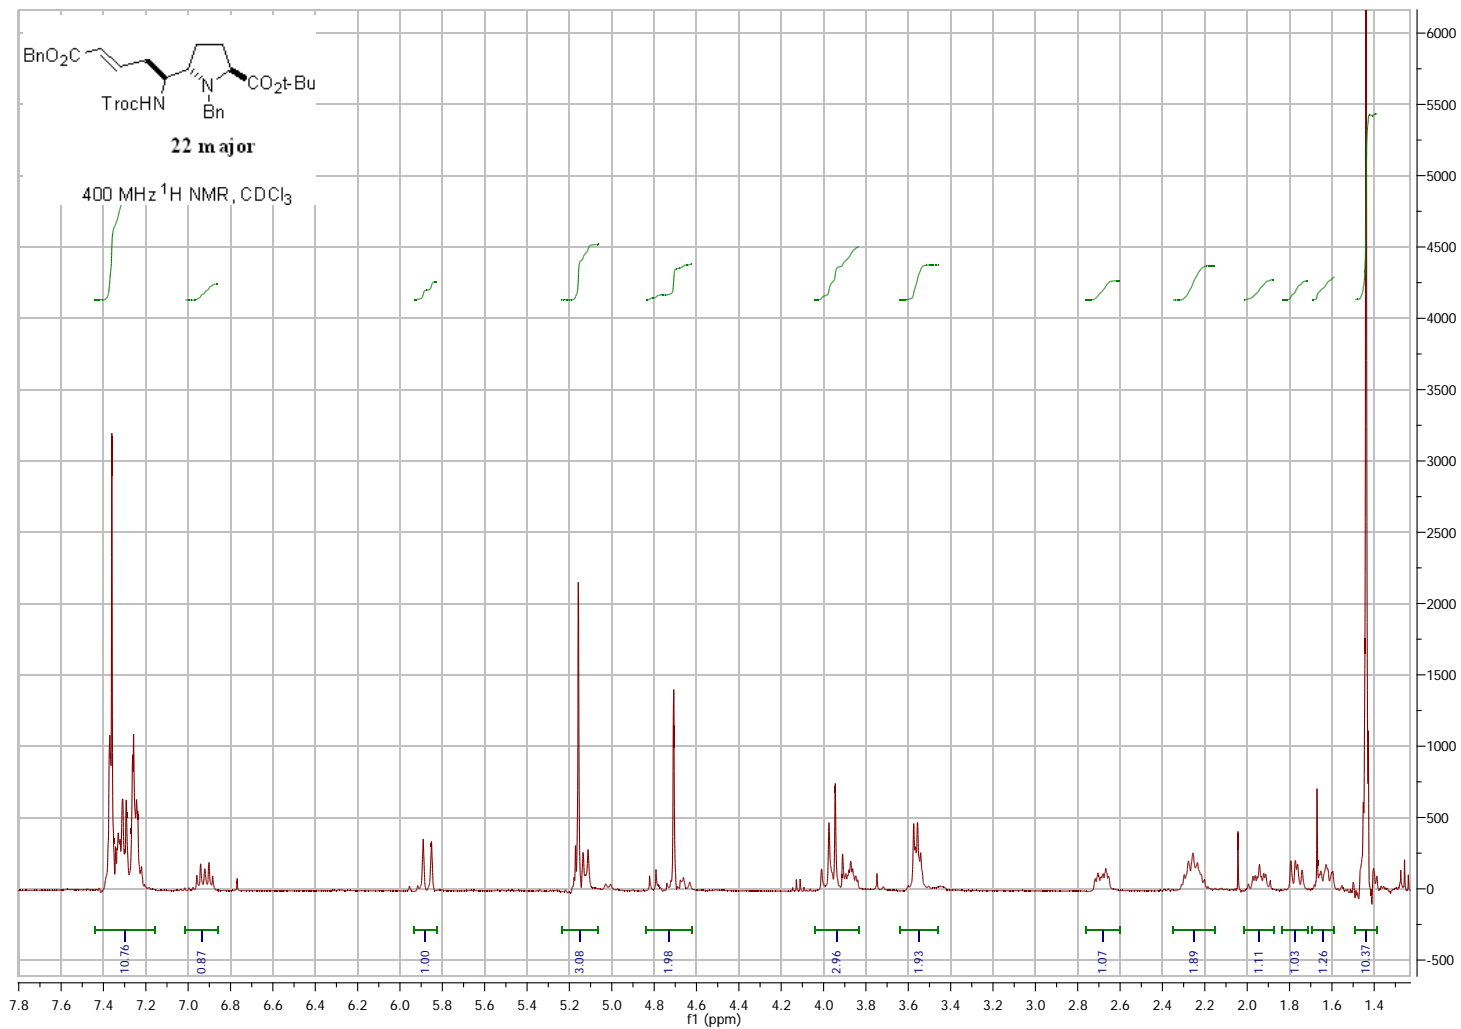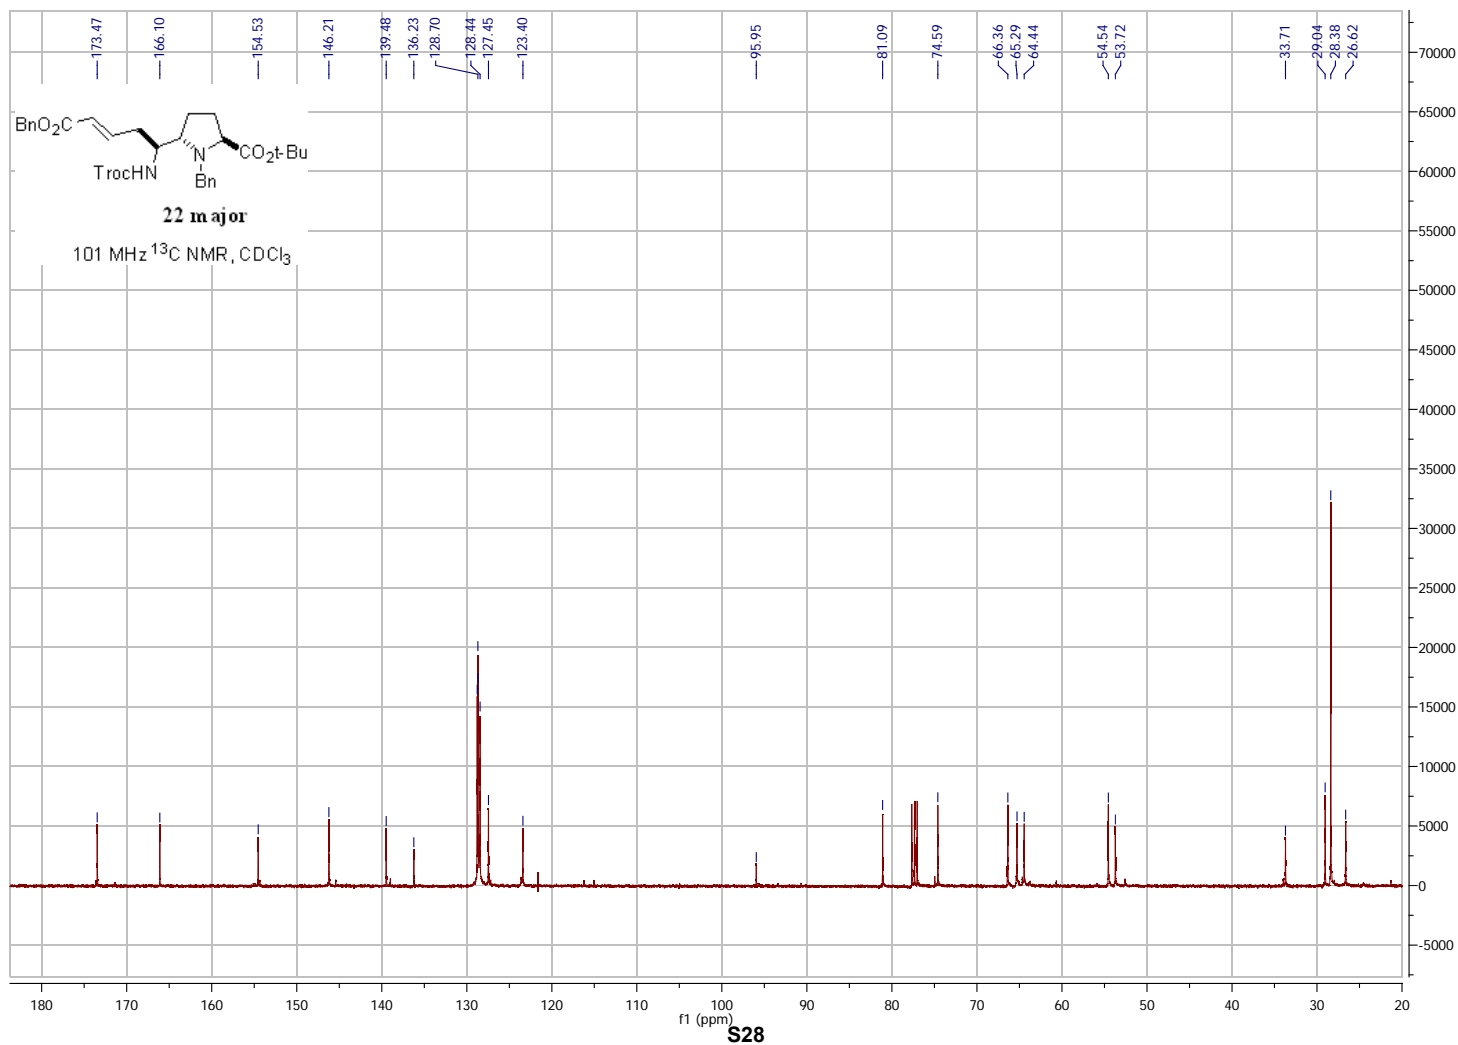



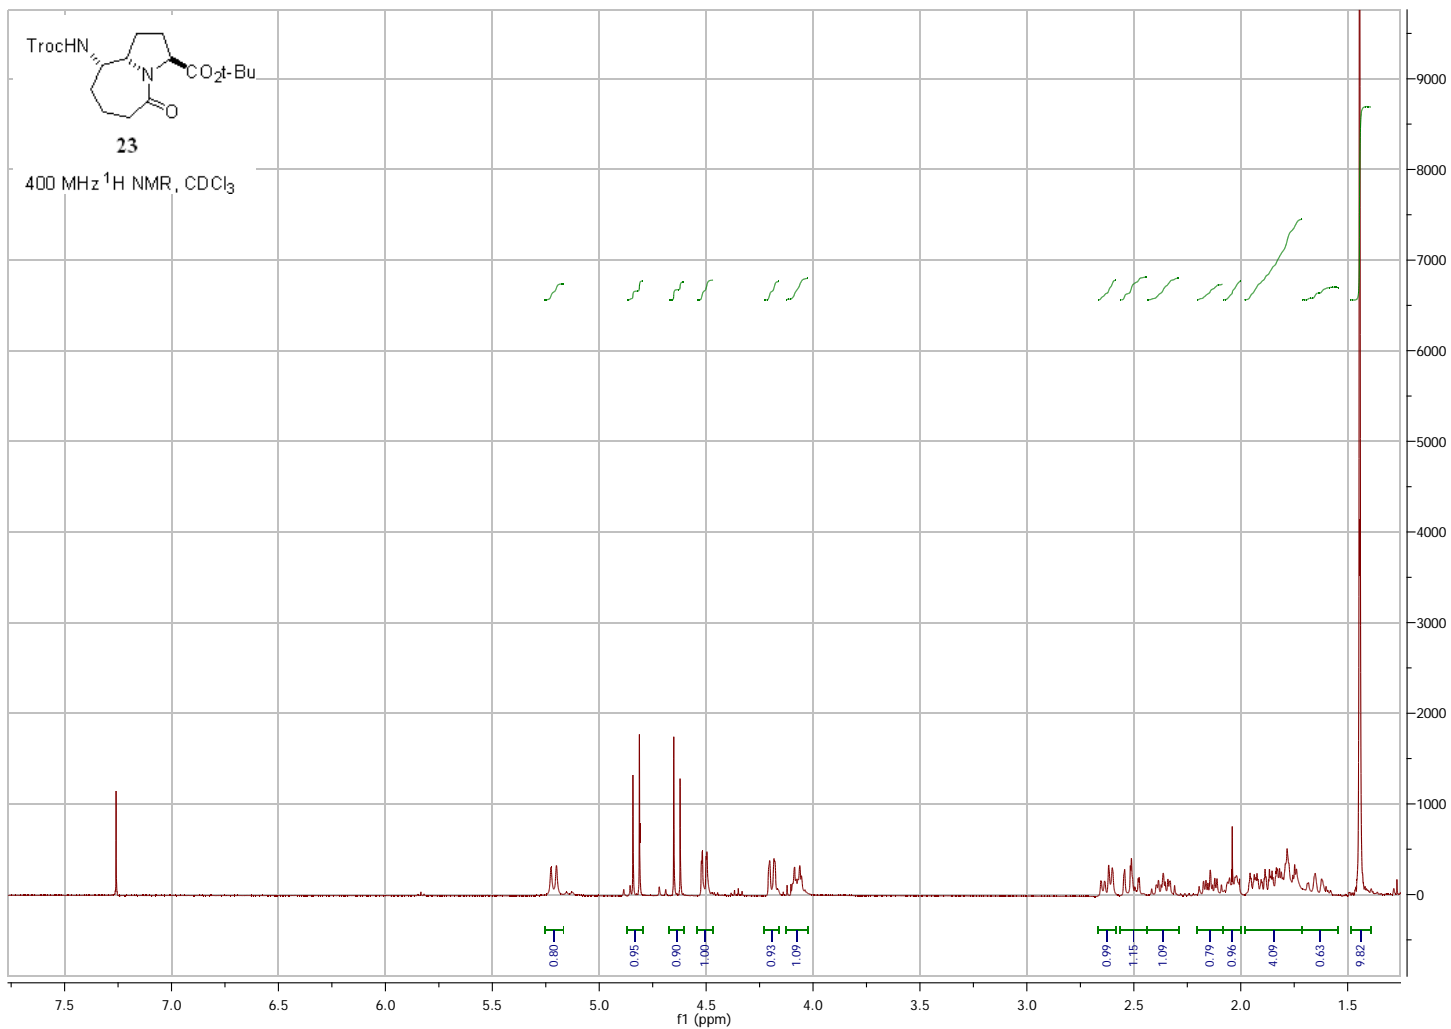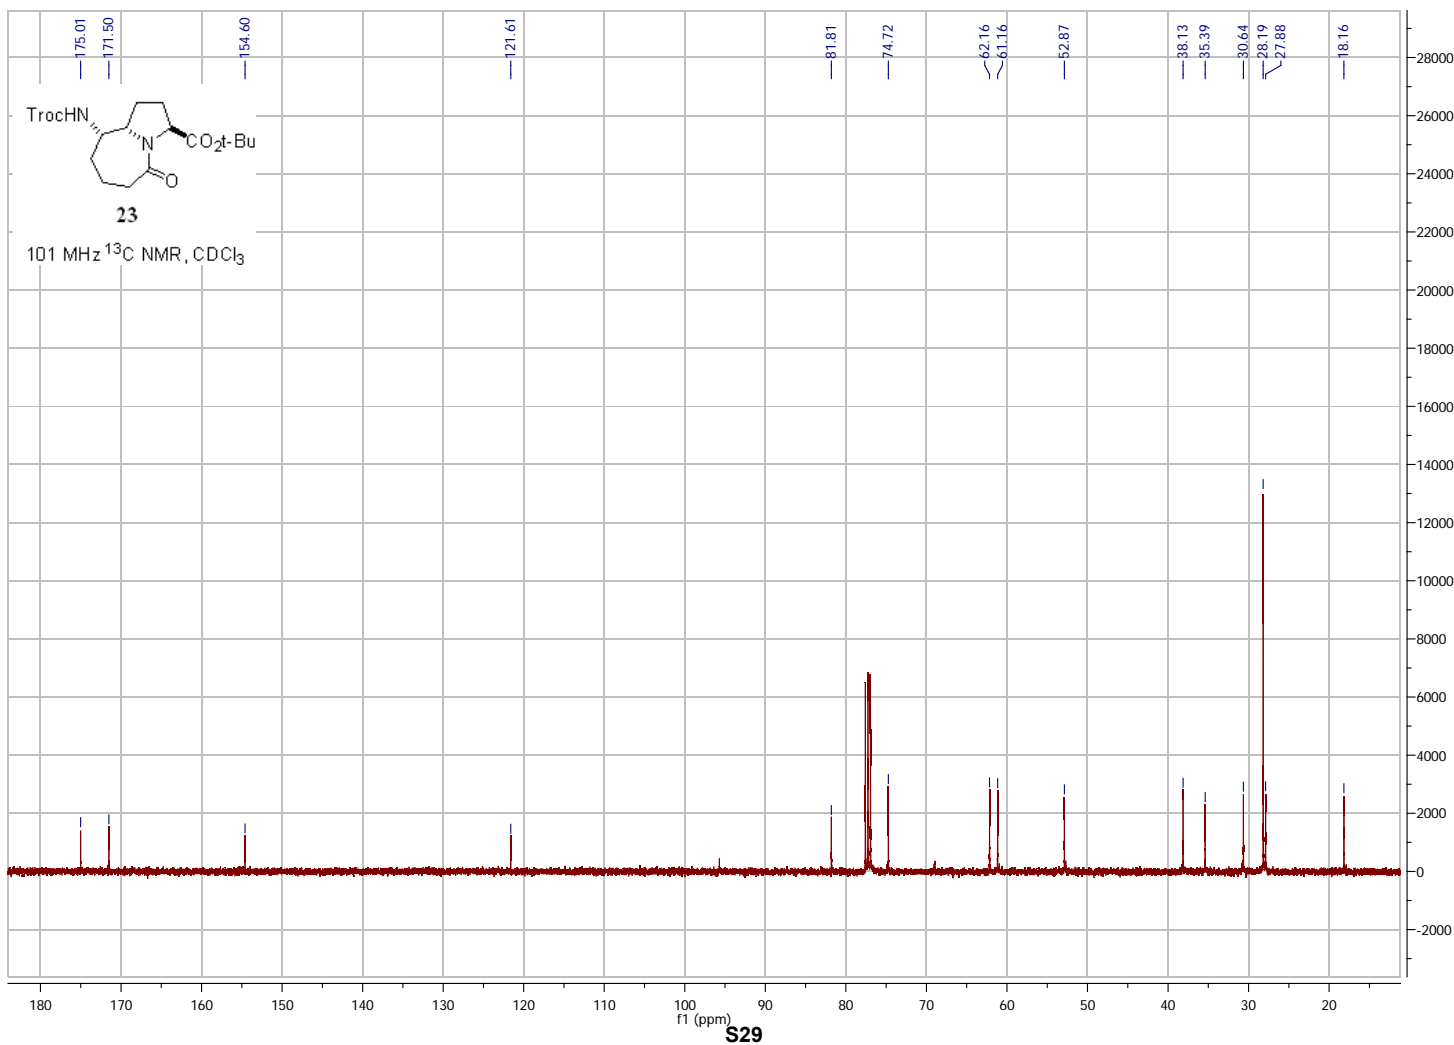

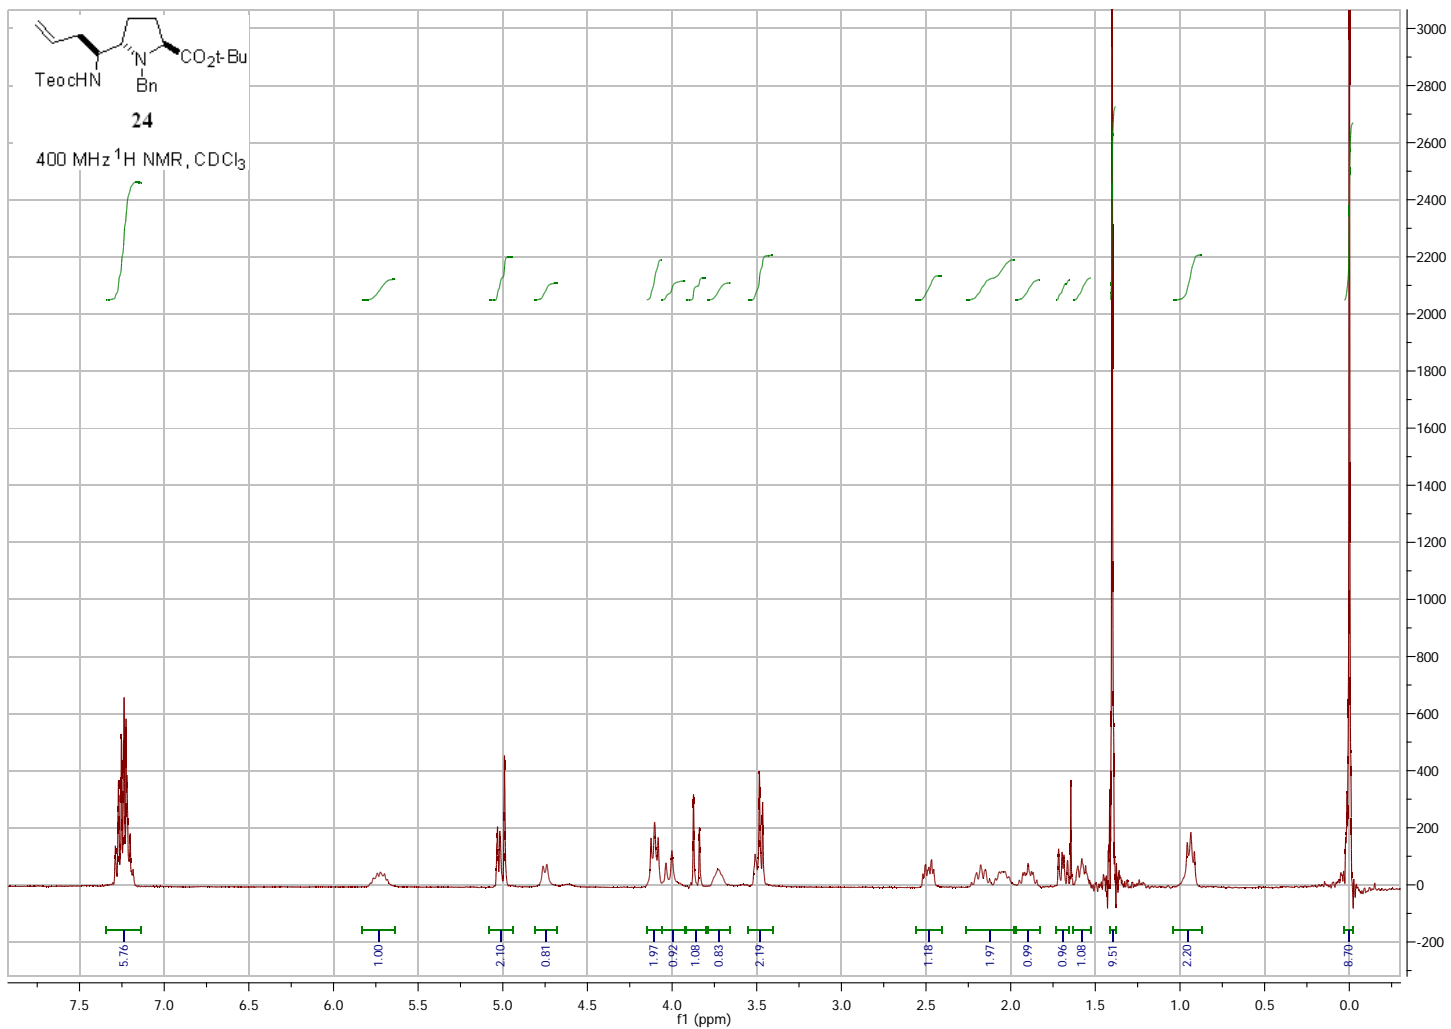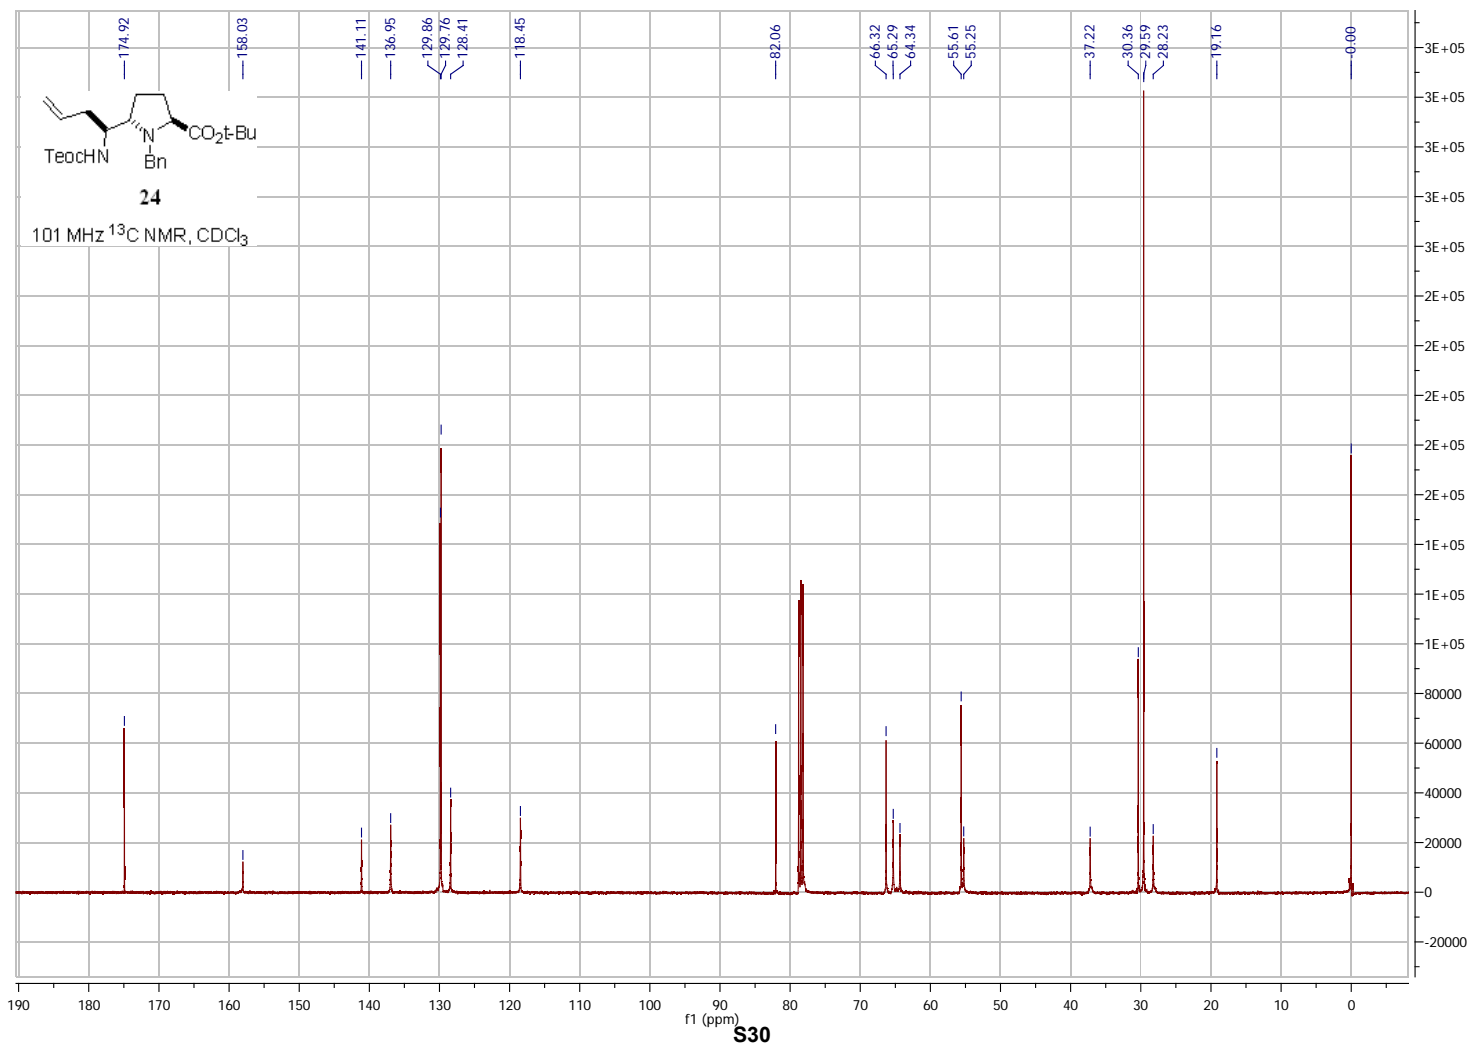

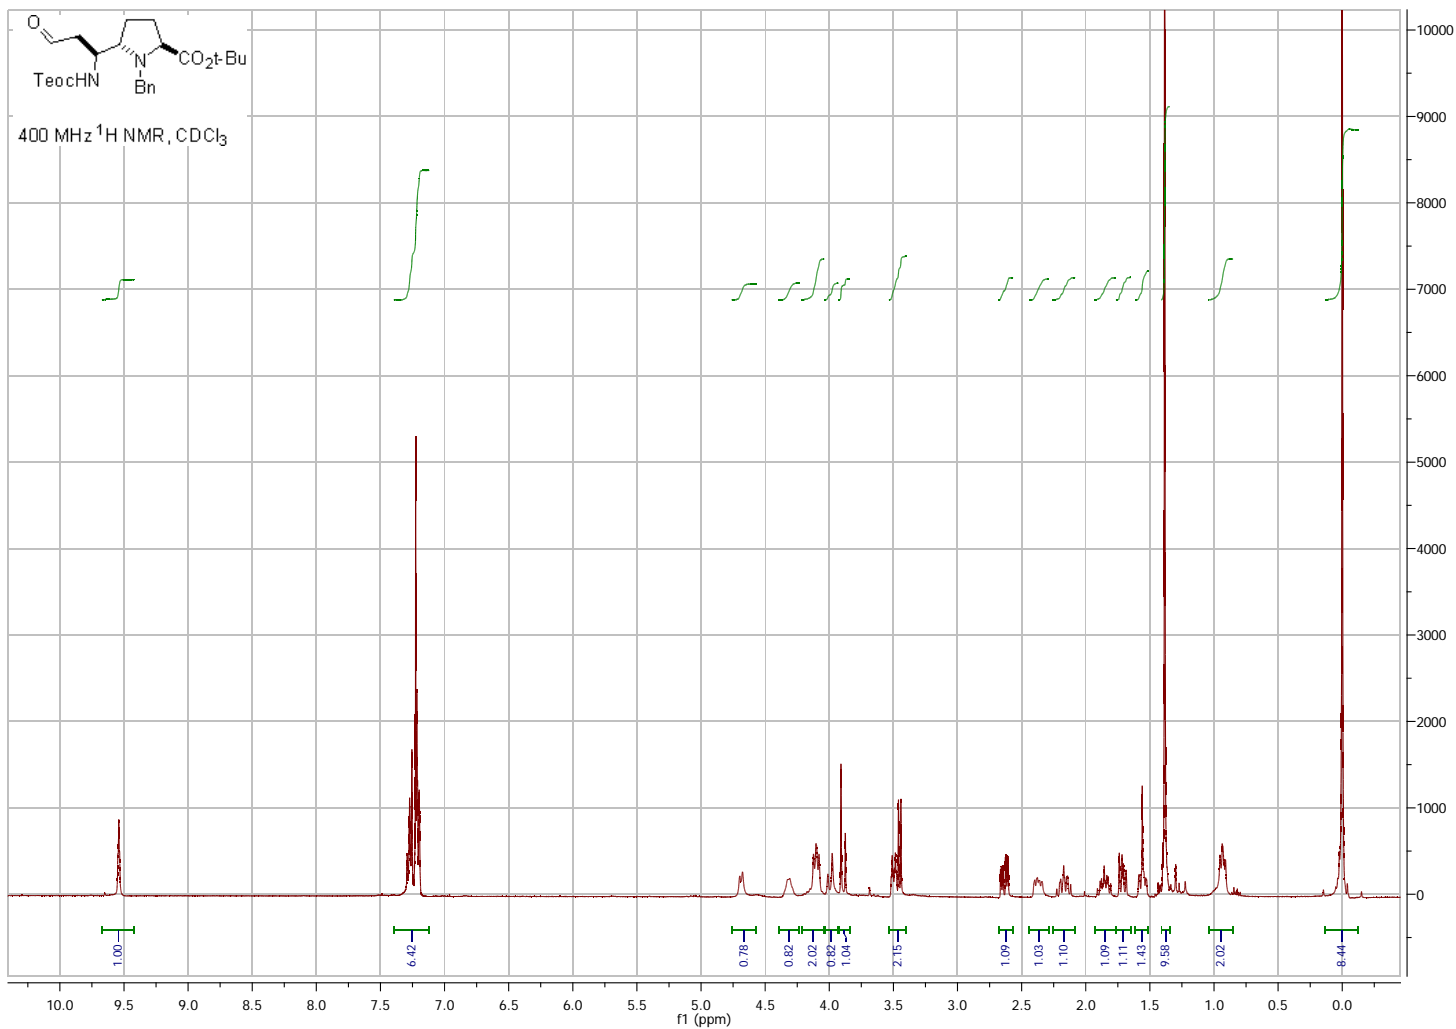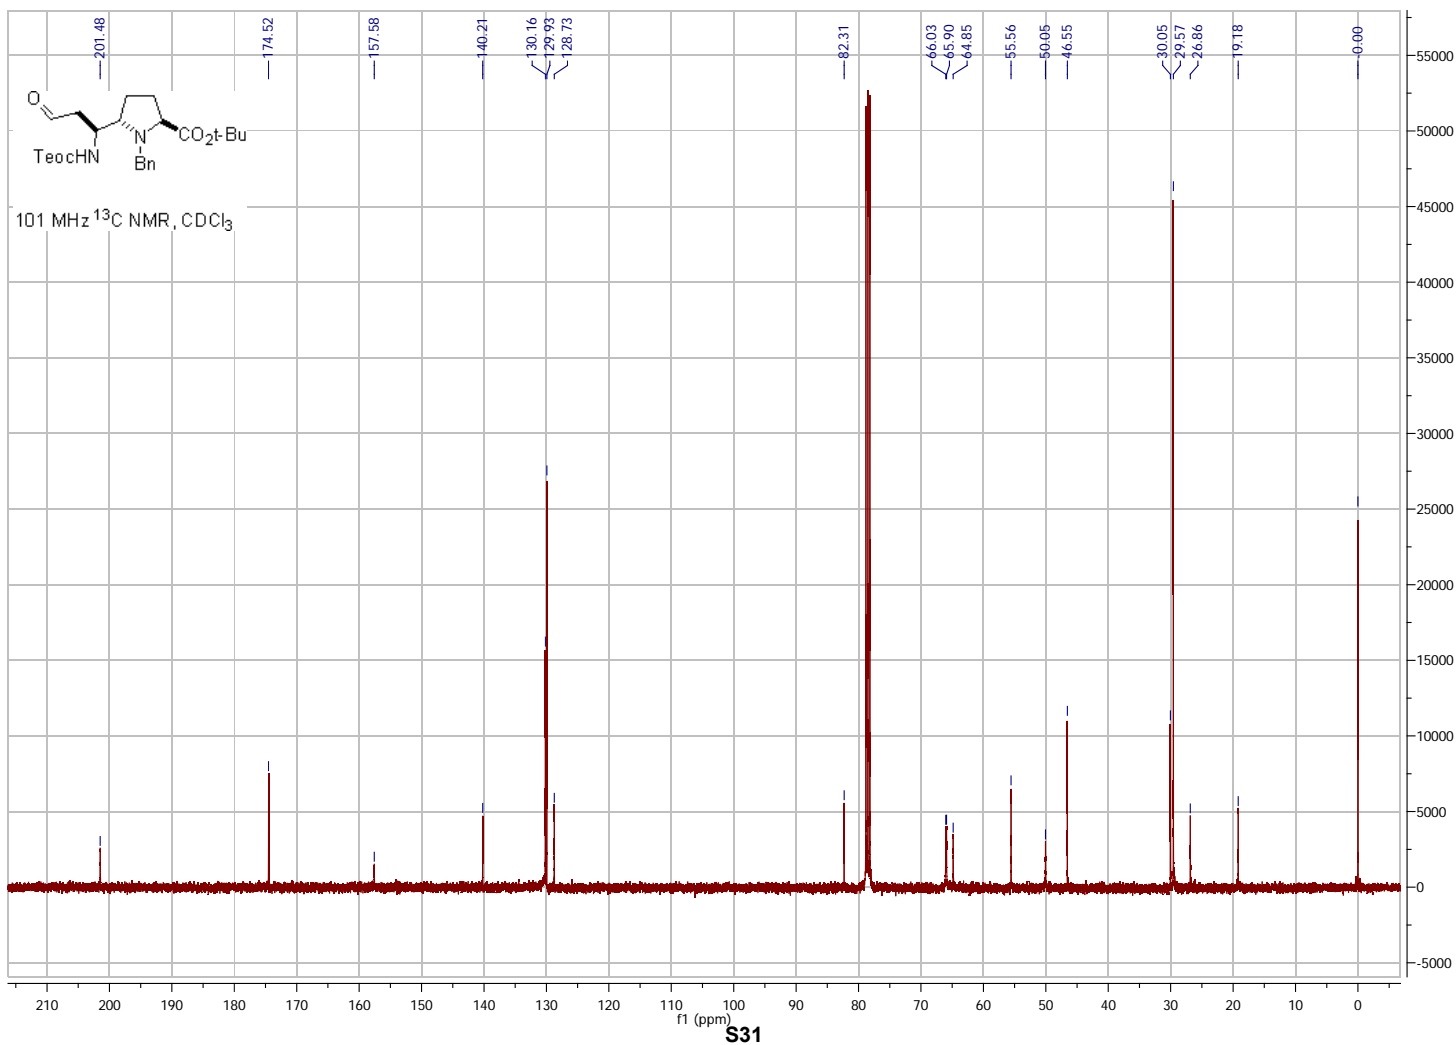

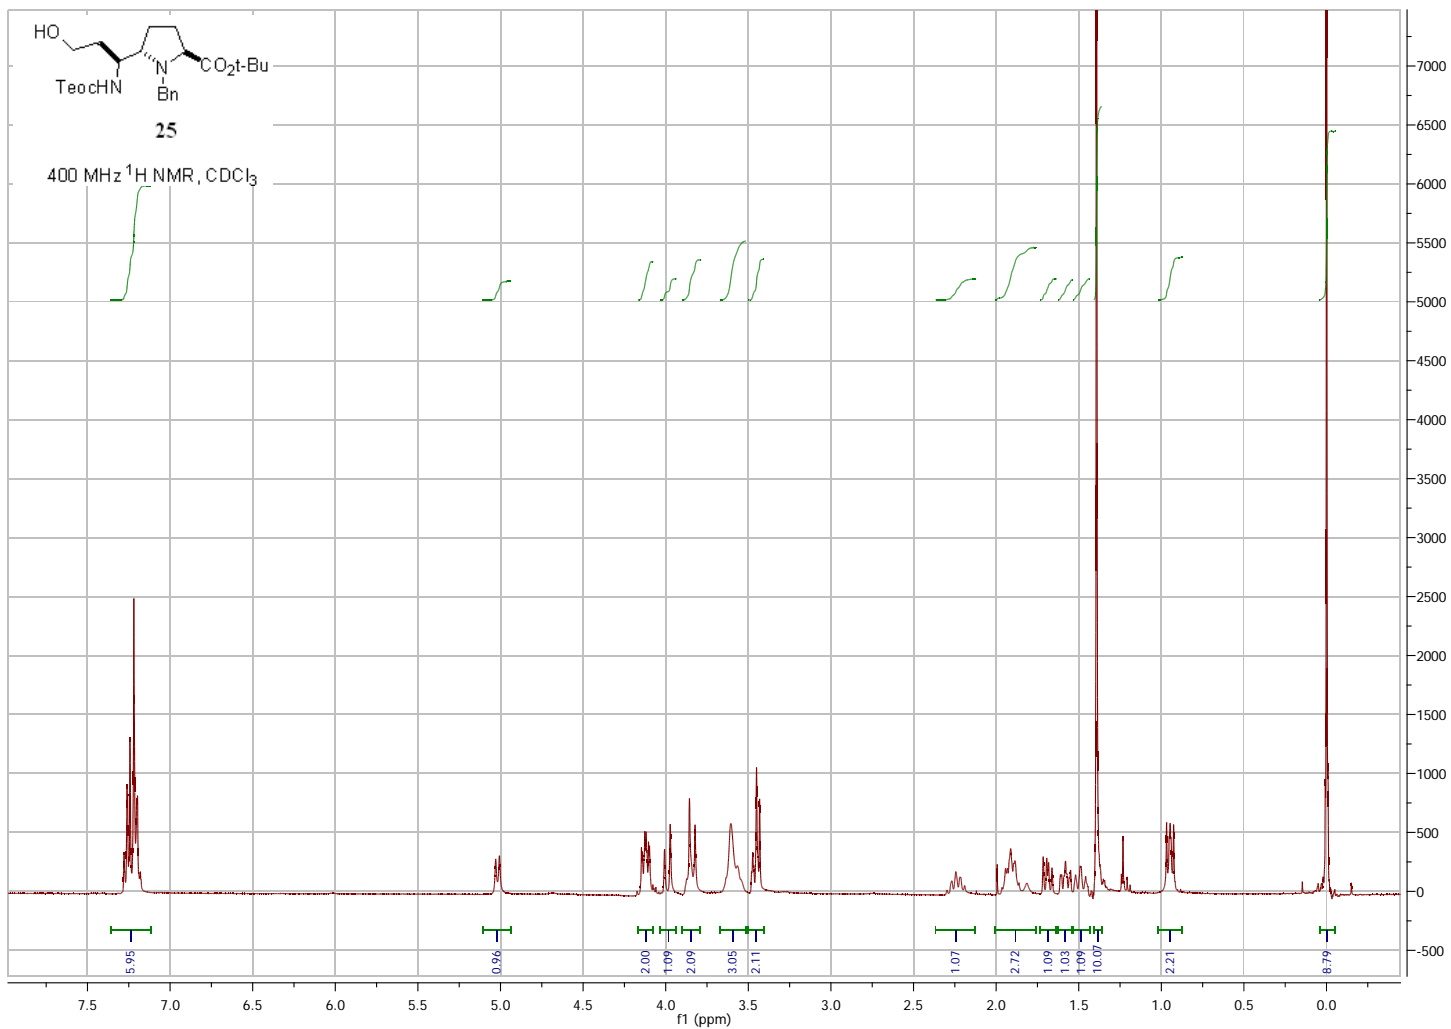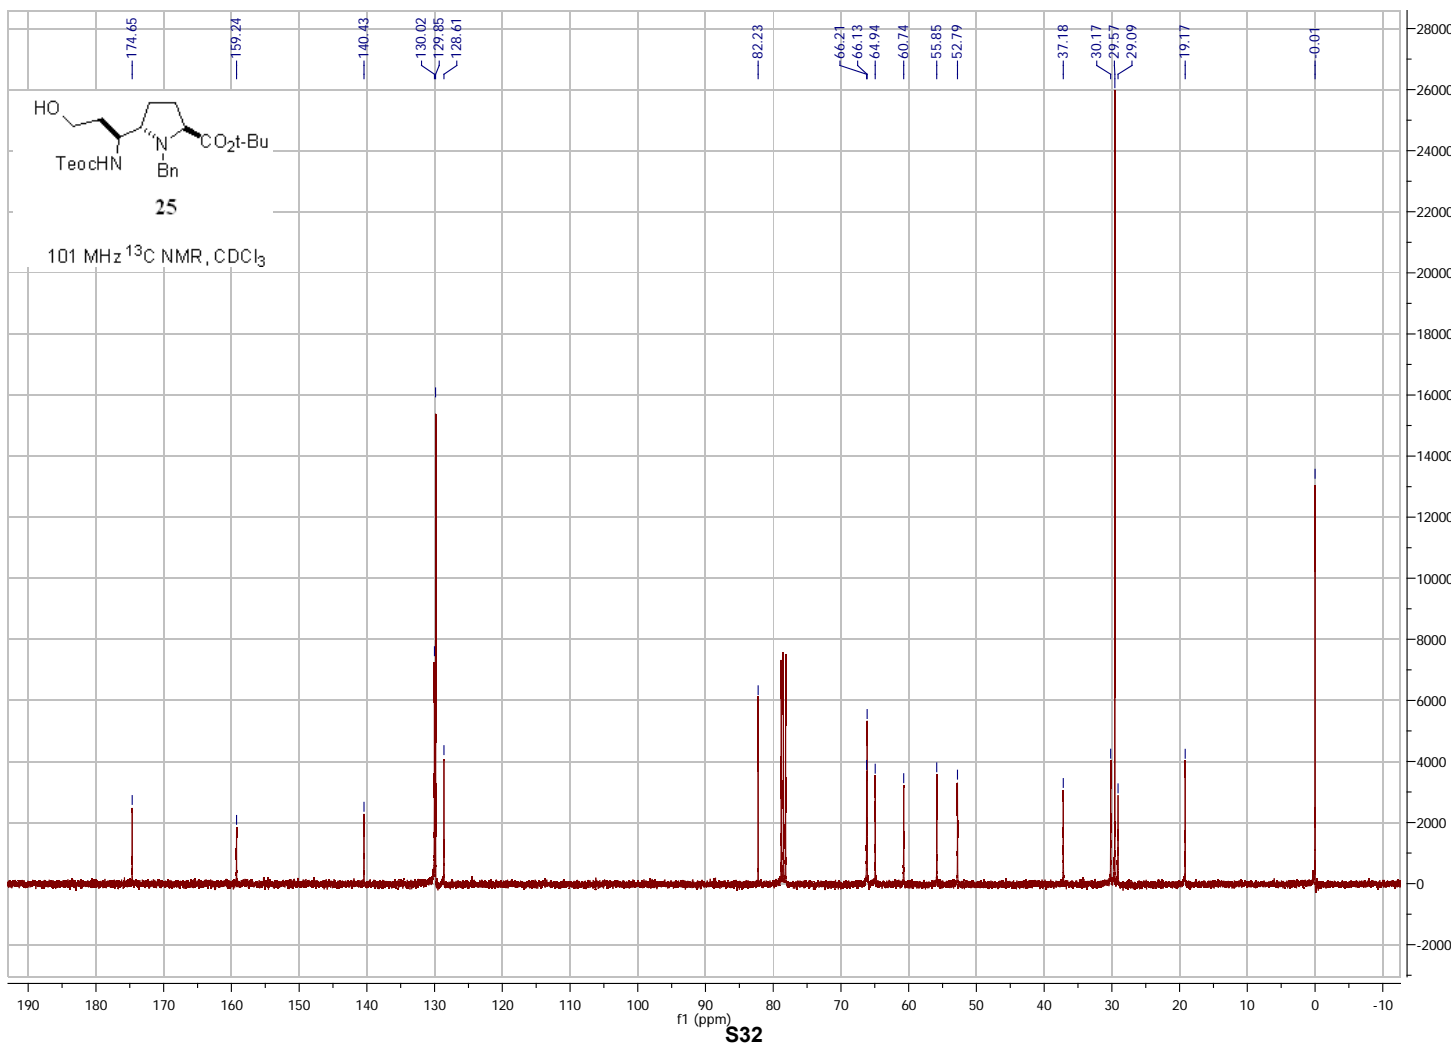

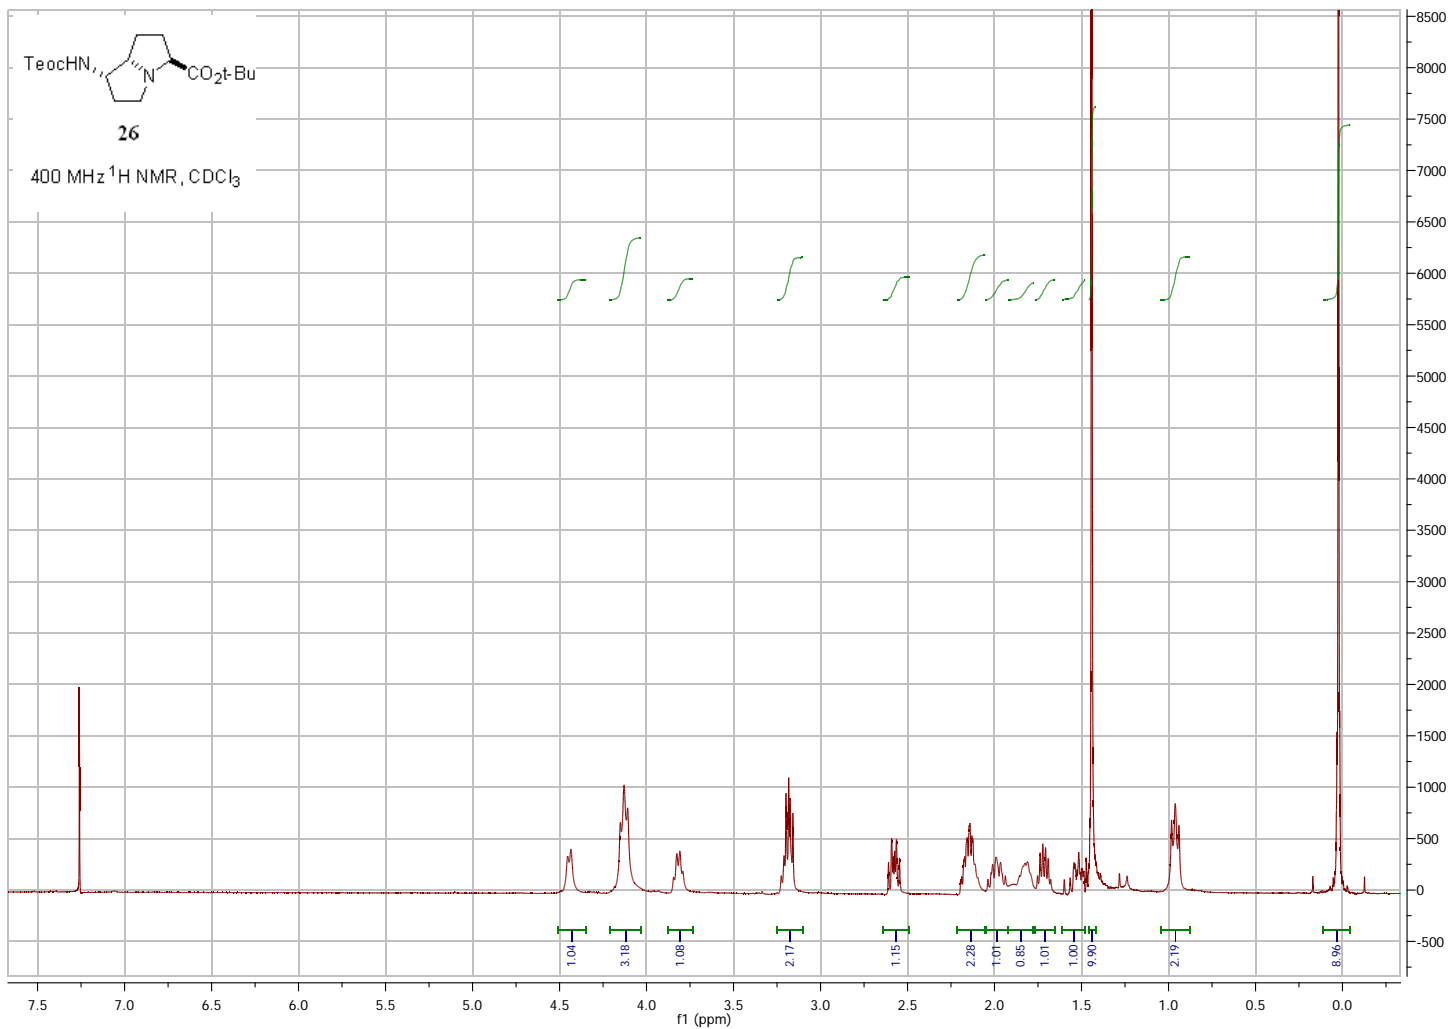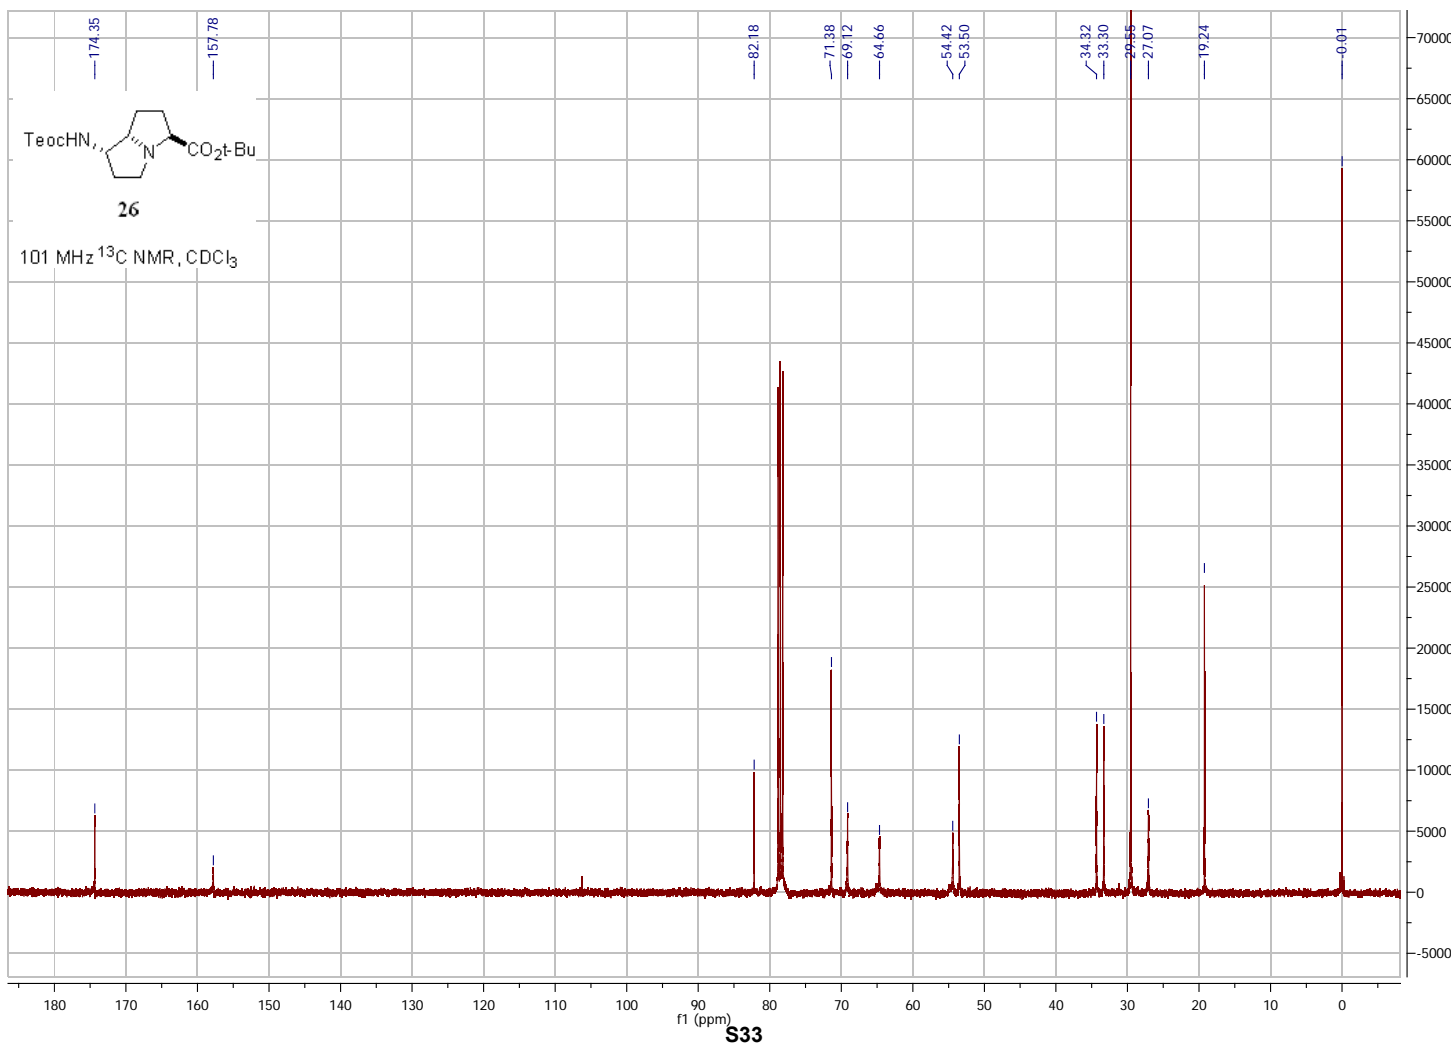

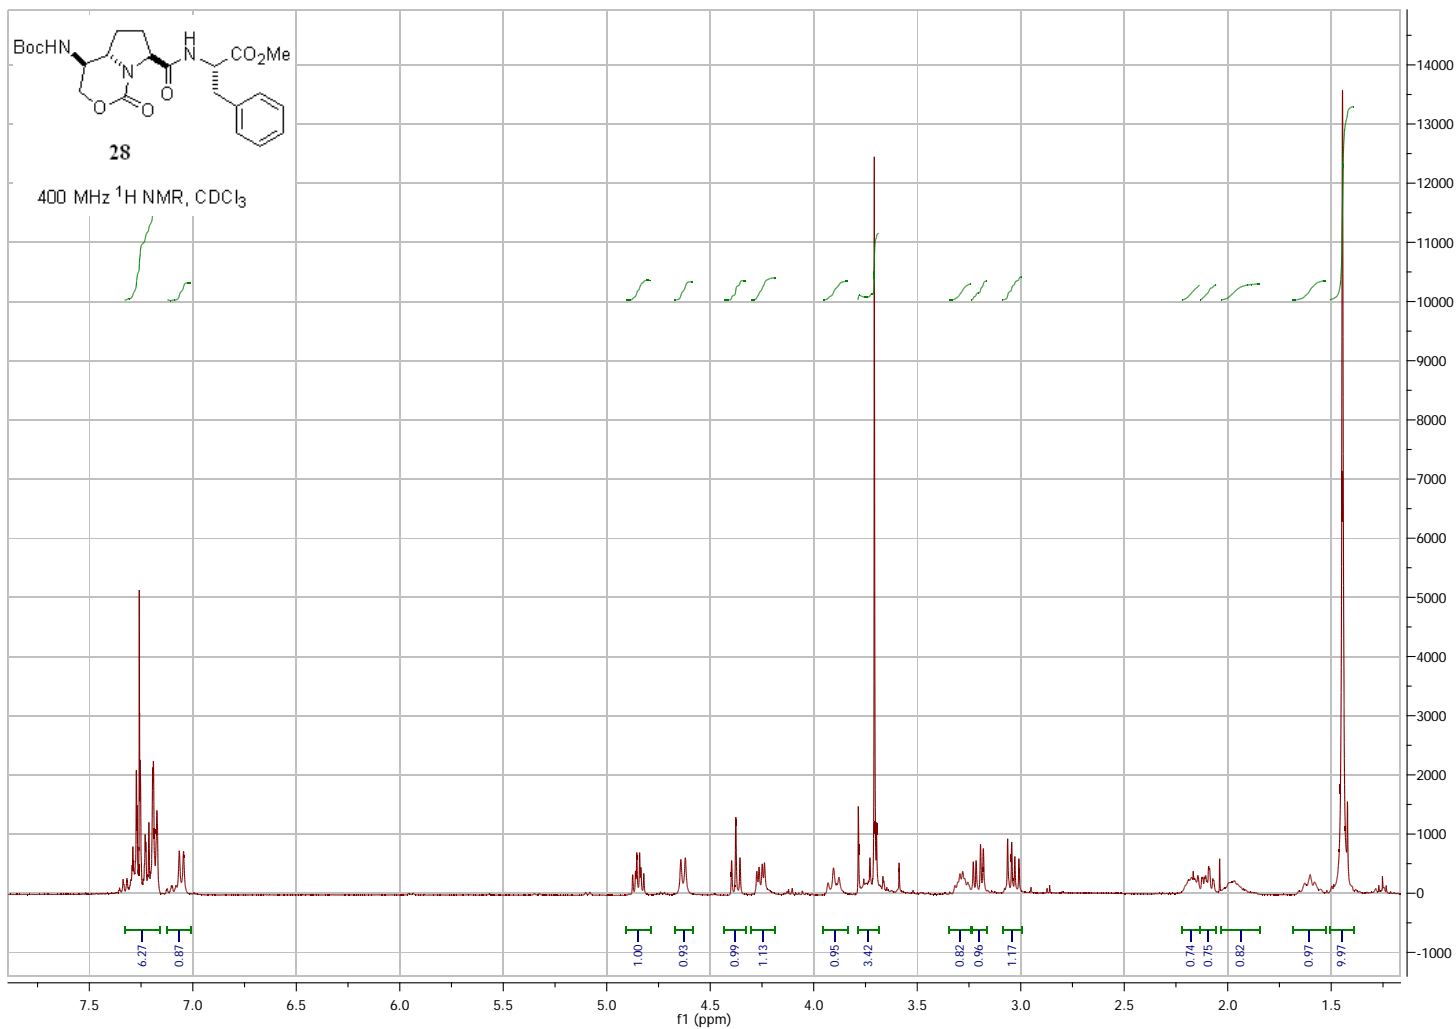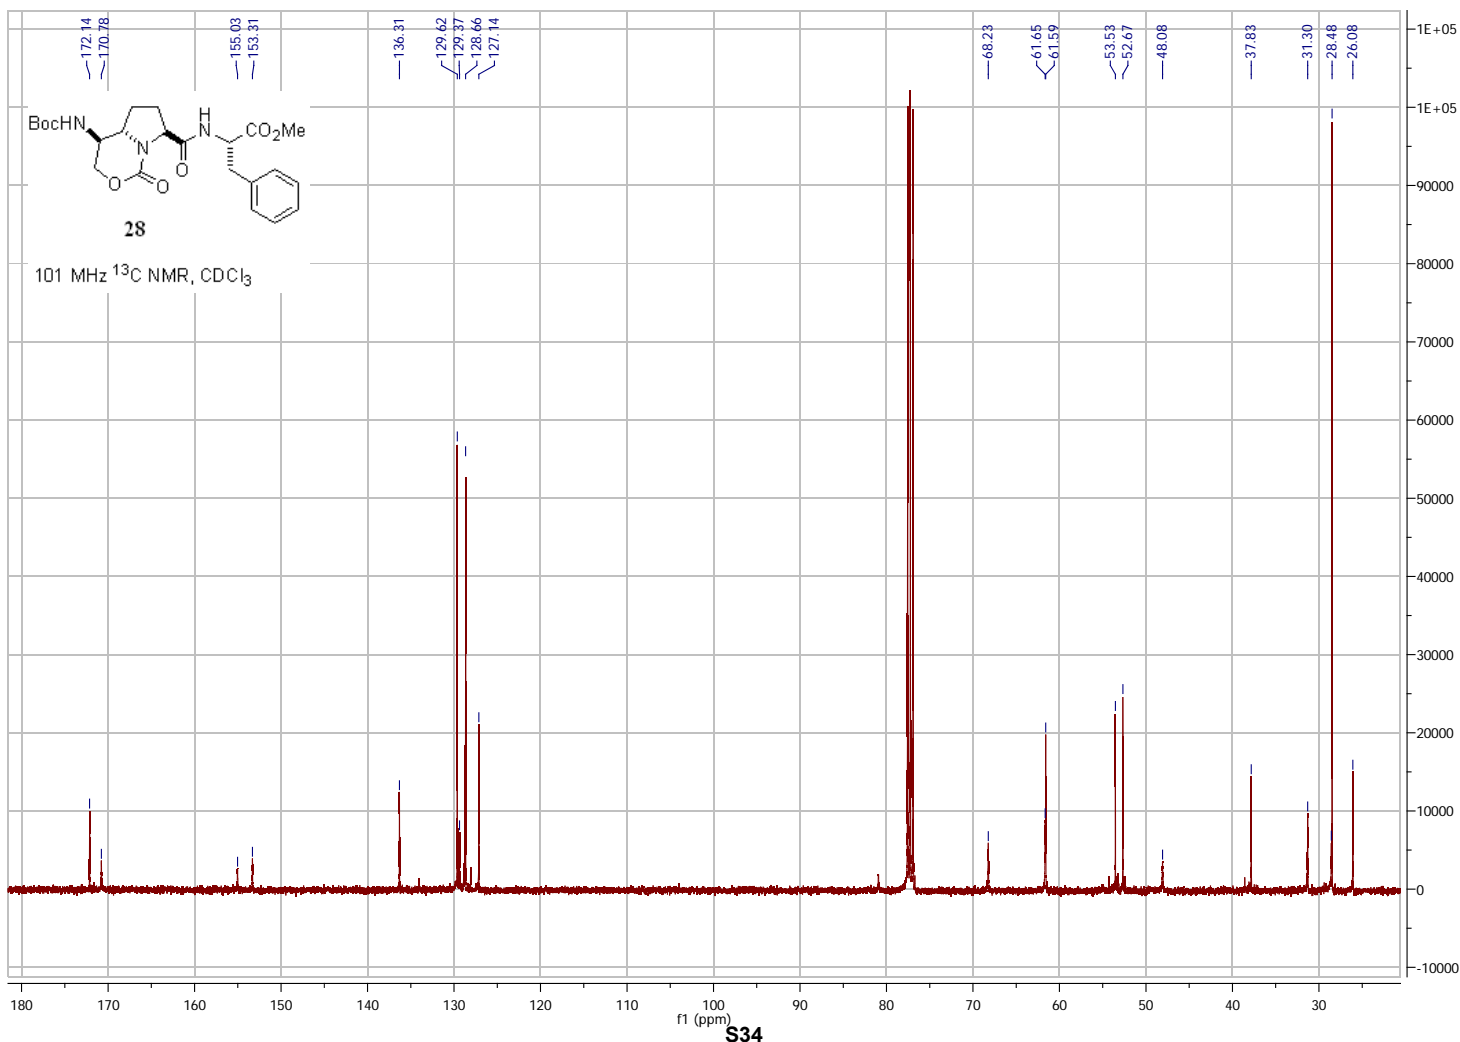



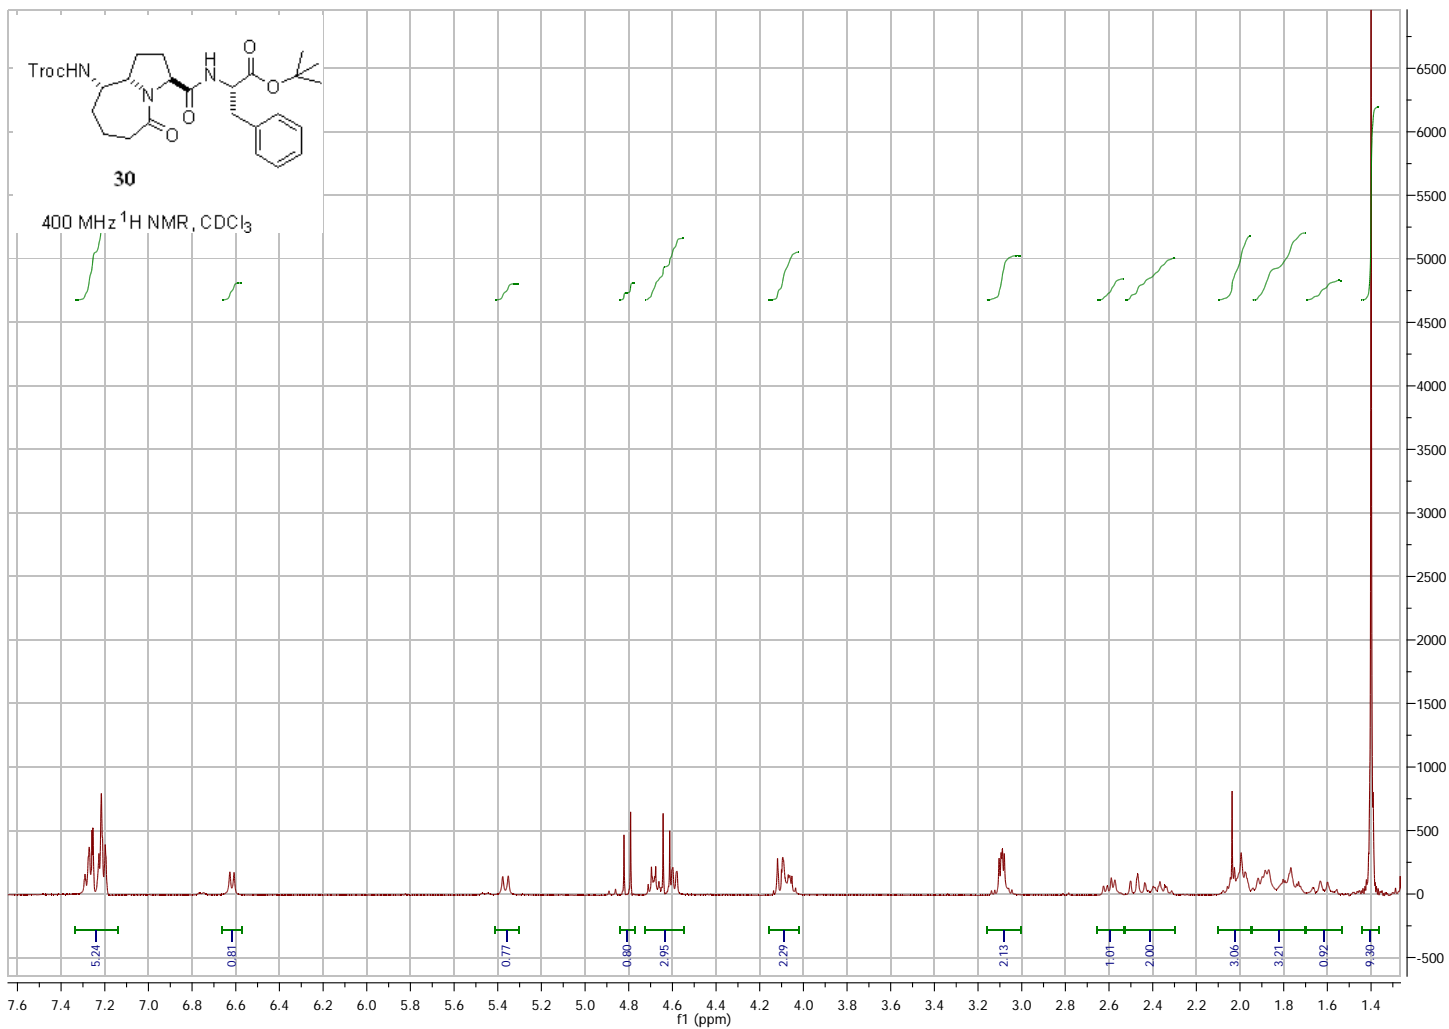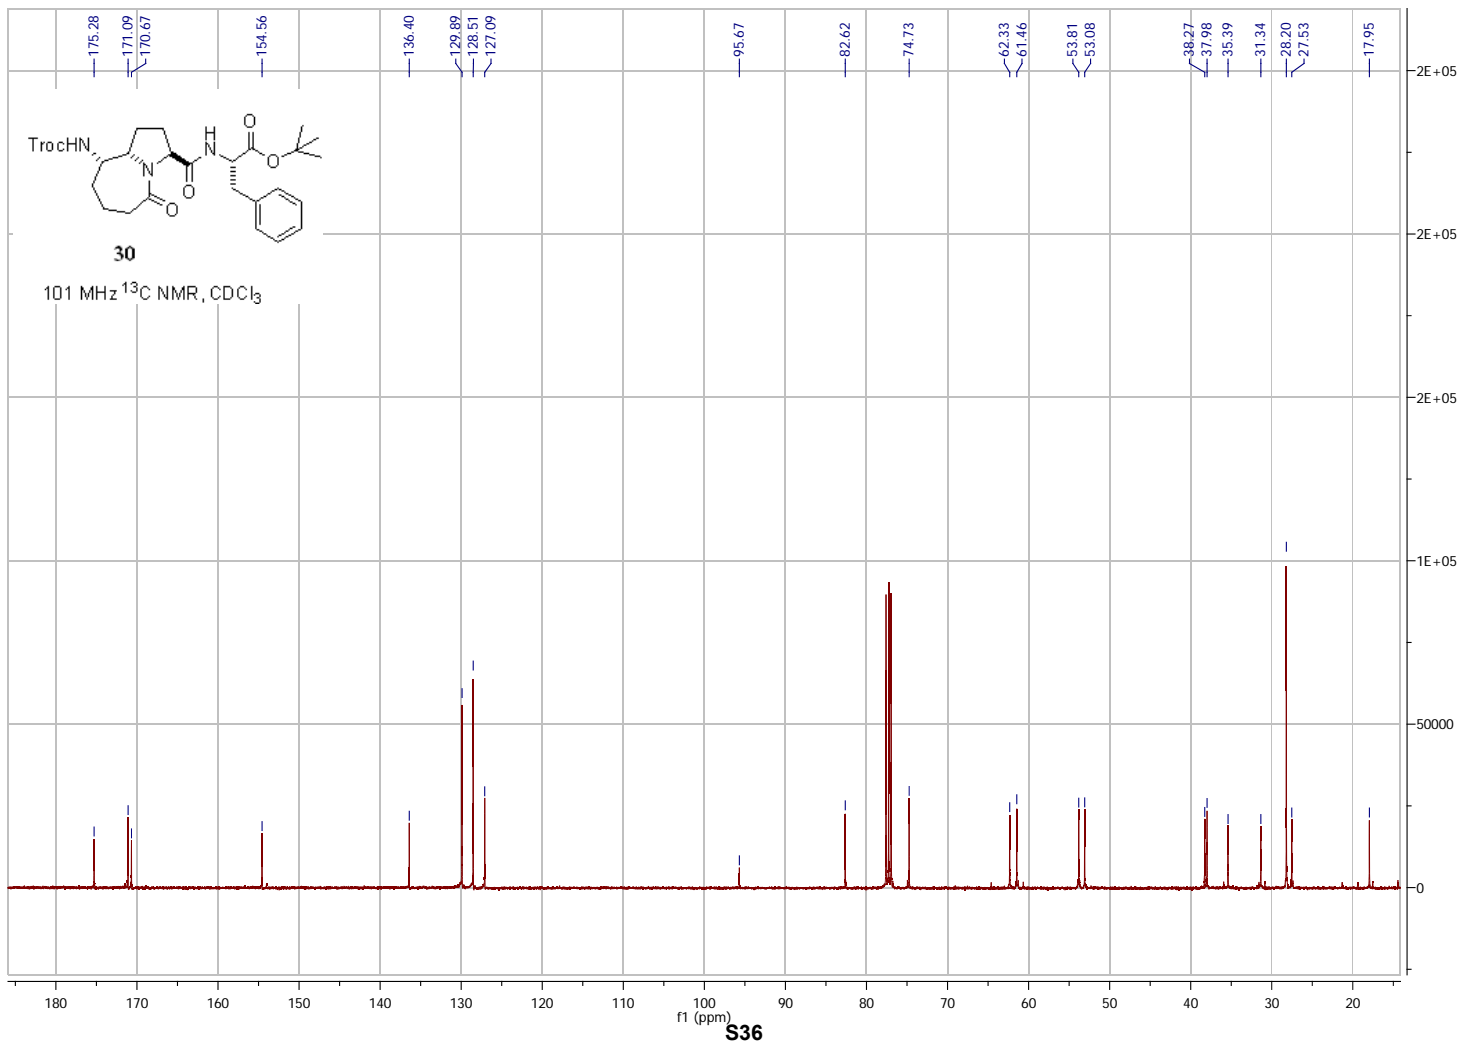



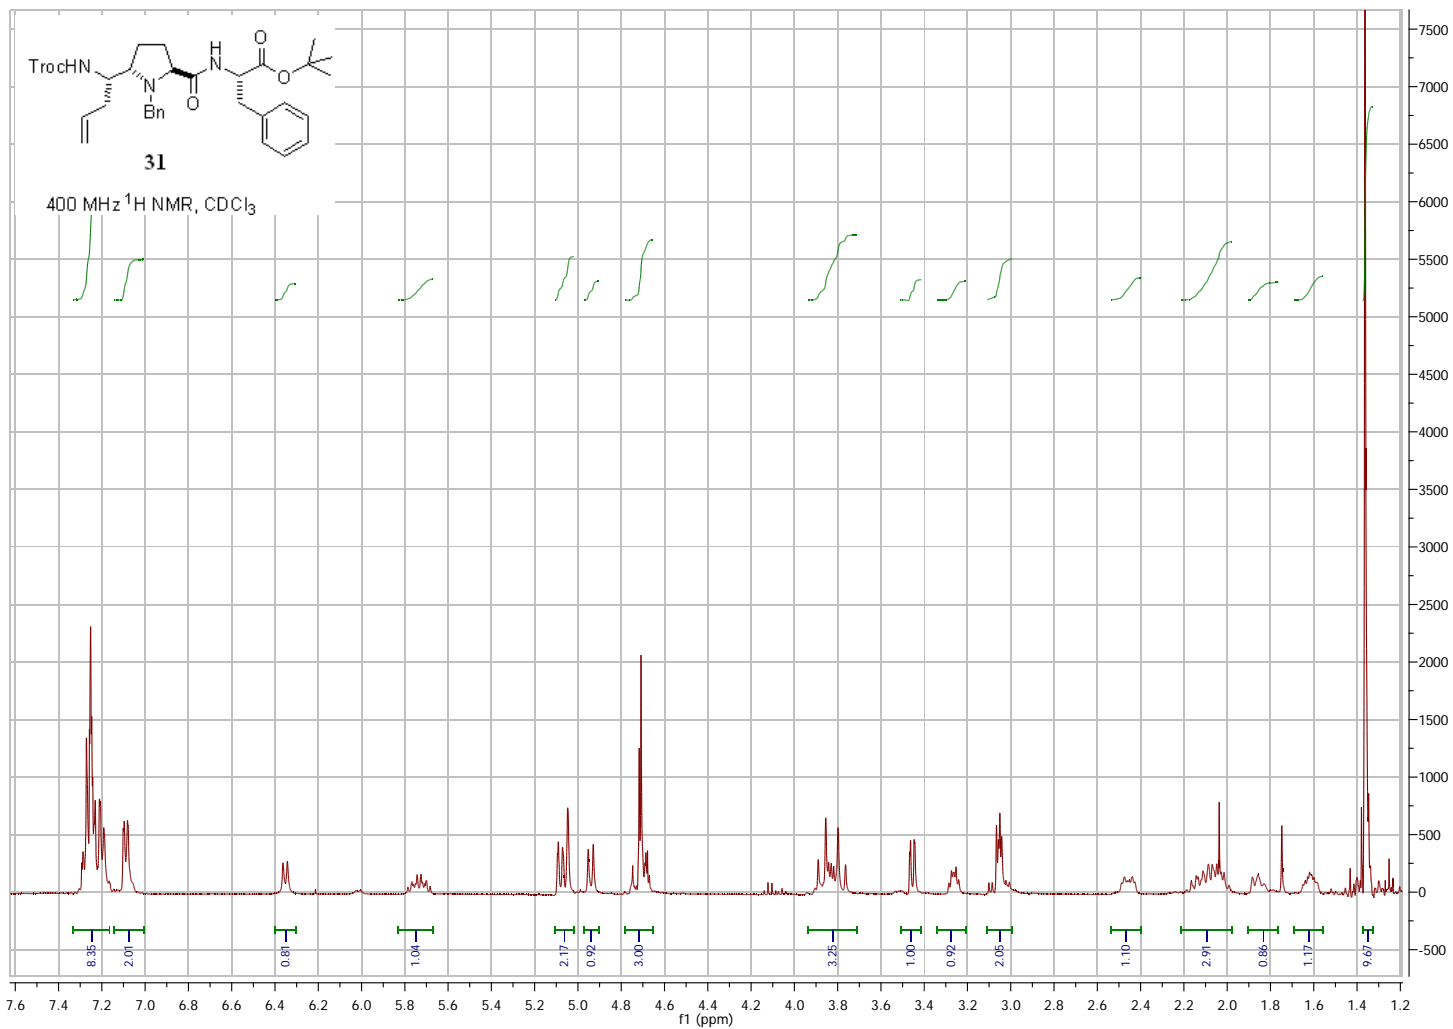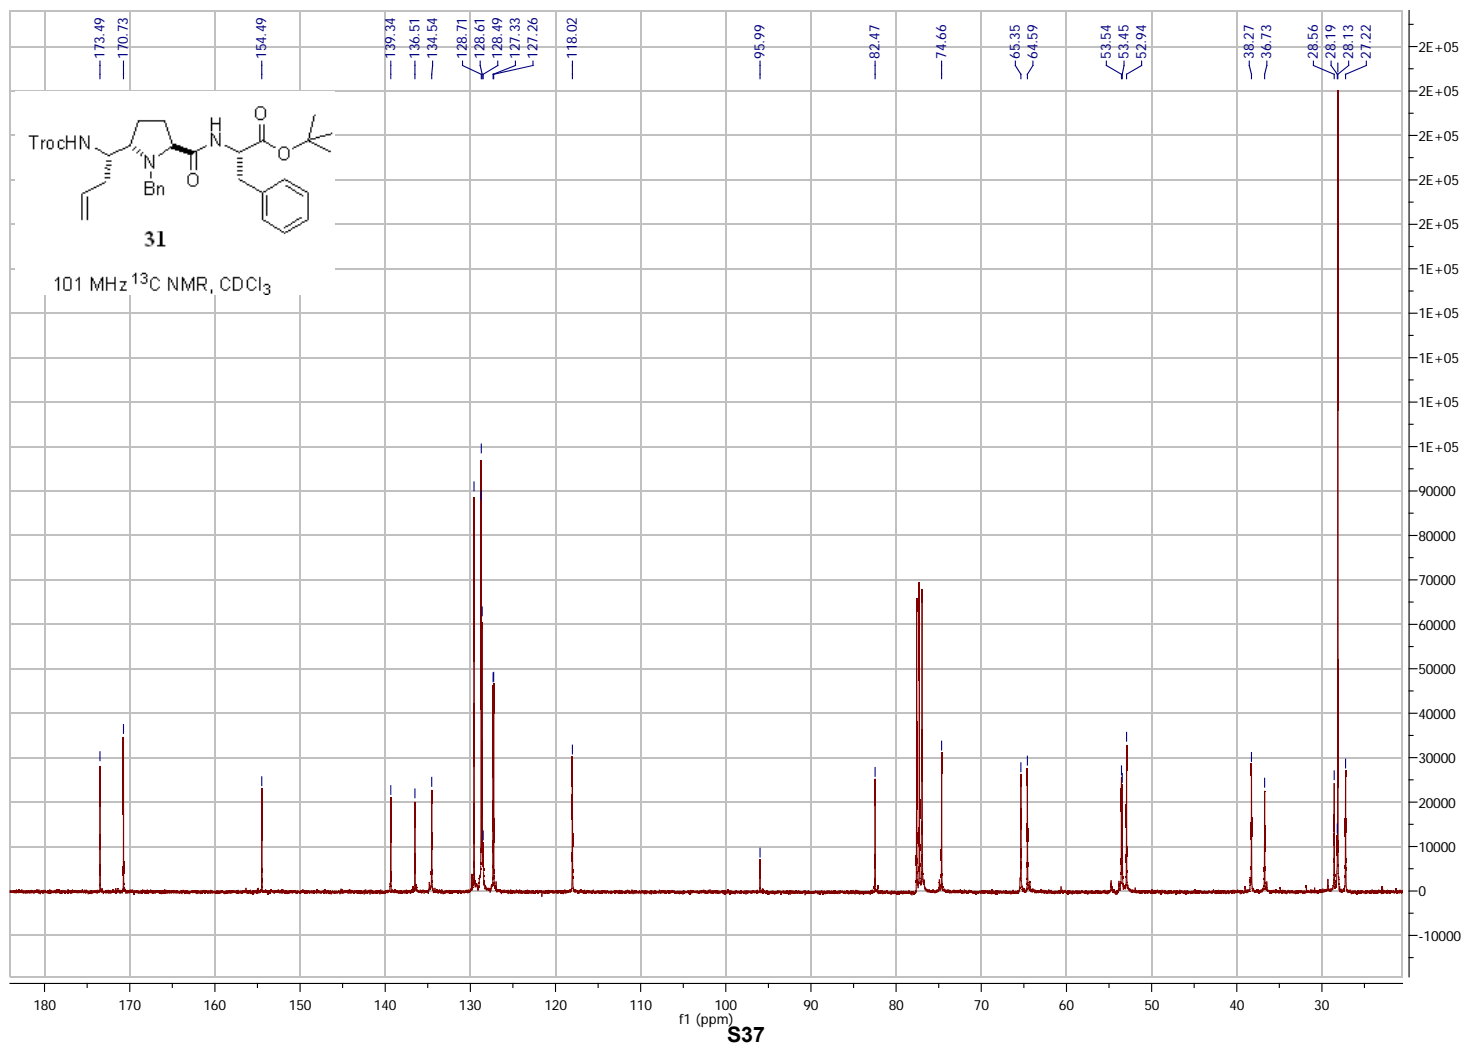

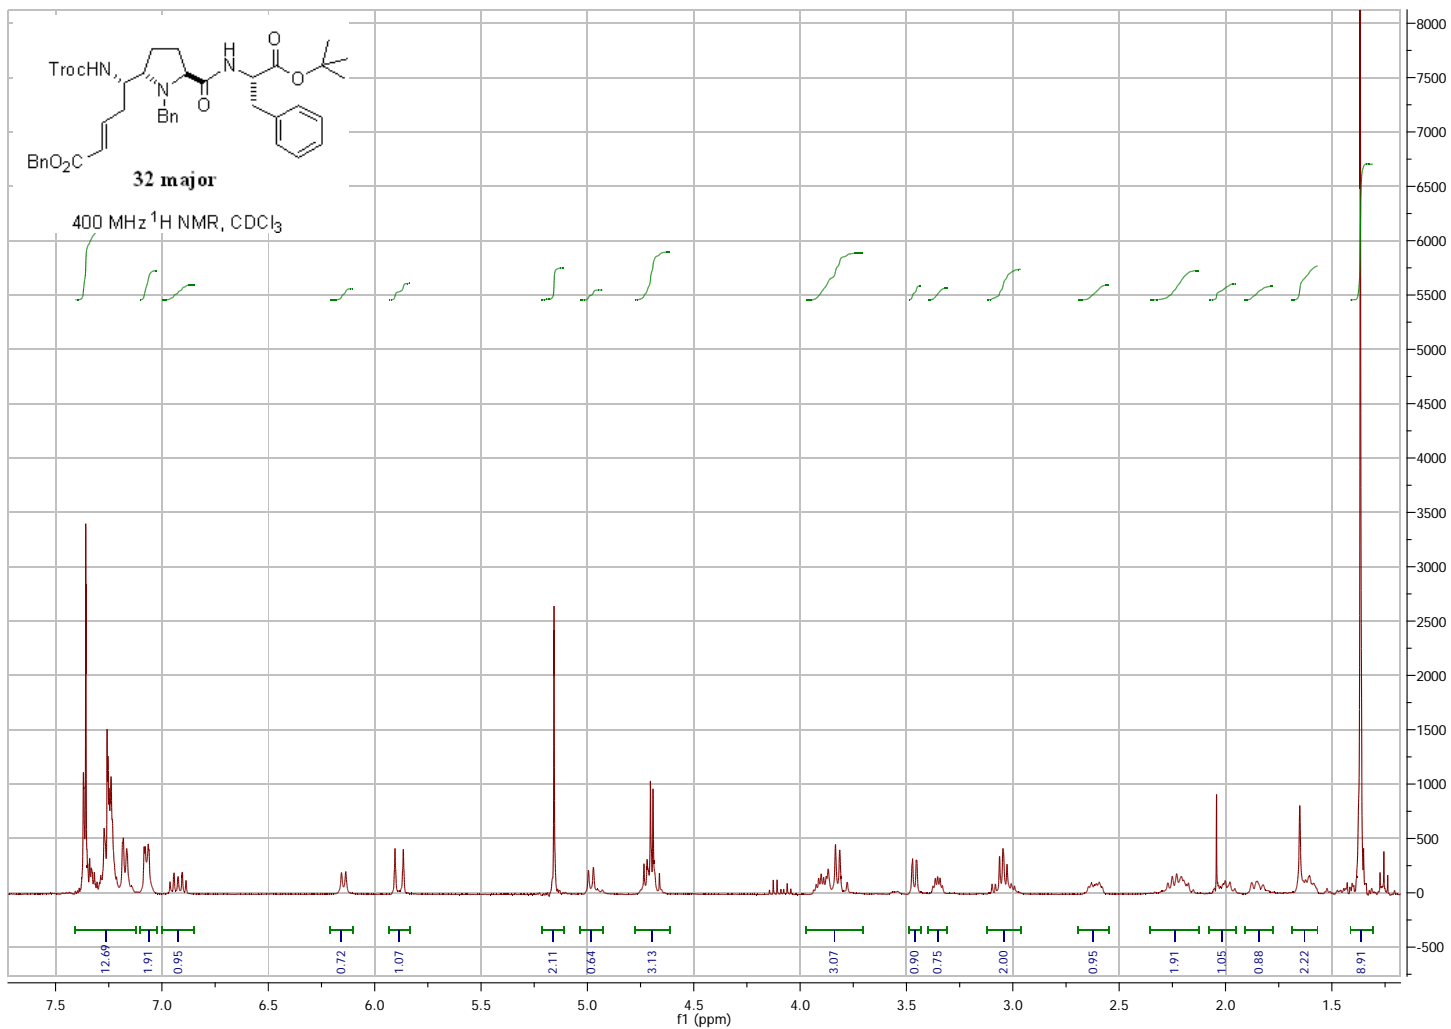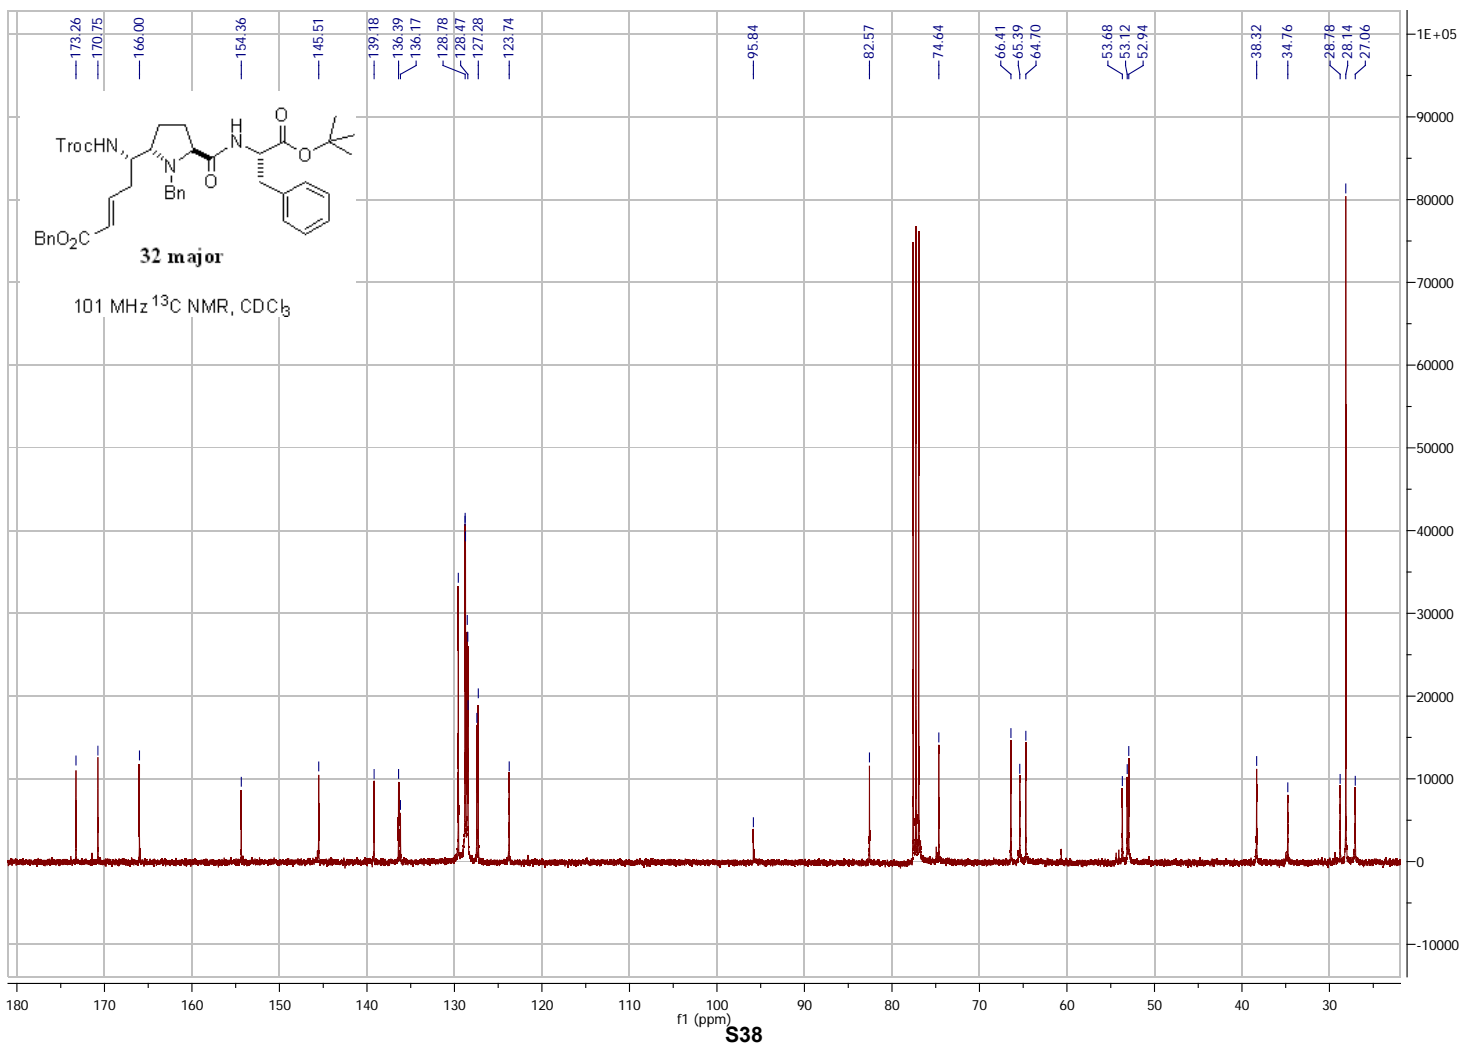

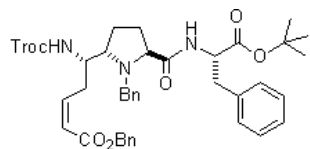

**32 minor**

400 MHz  $^1\text{H}$  NMR,  $\text{CDCl}_3$

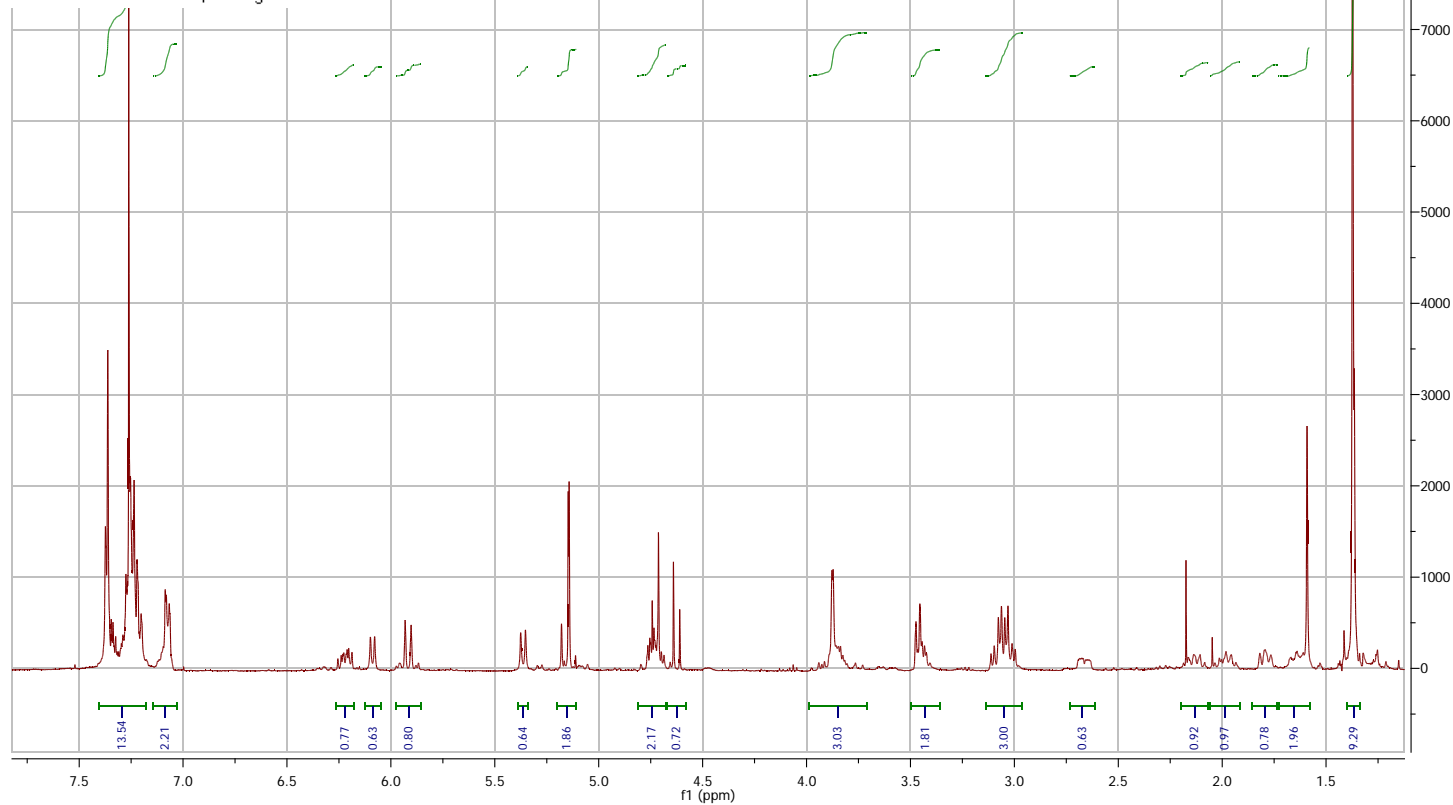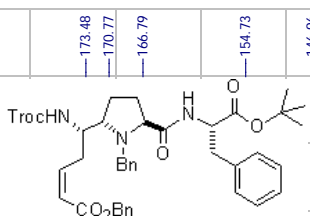

**32 minor**

101 MHz  $^{13}\text{C}$  NMR,  $\text{CDCl}_3$

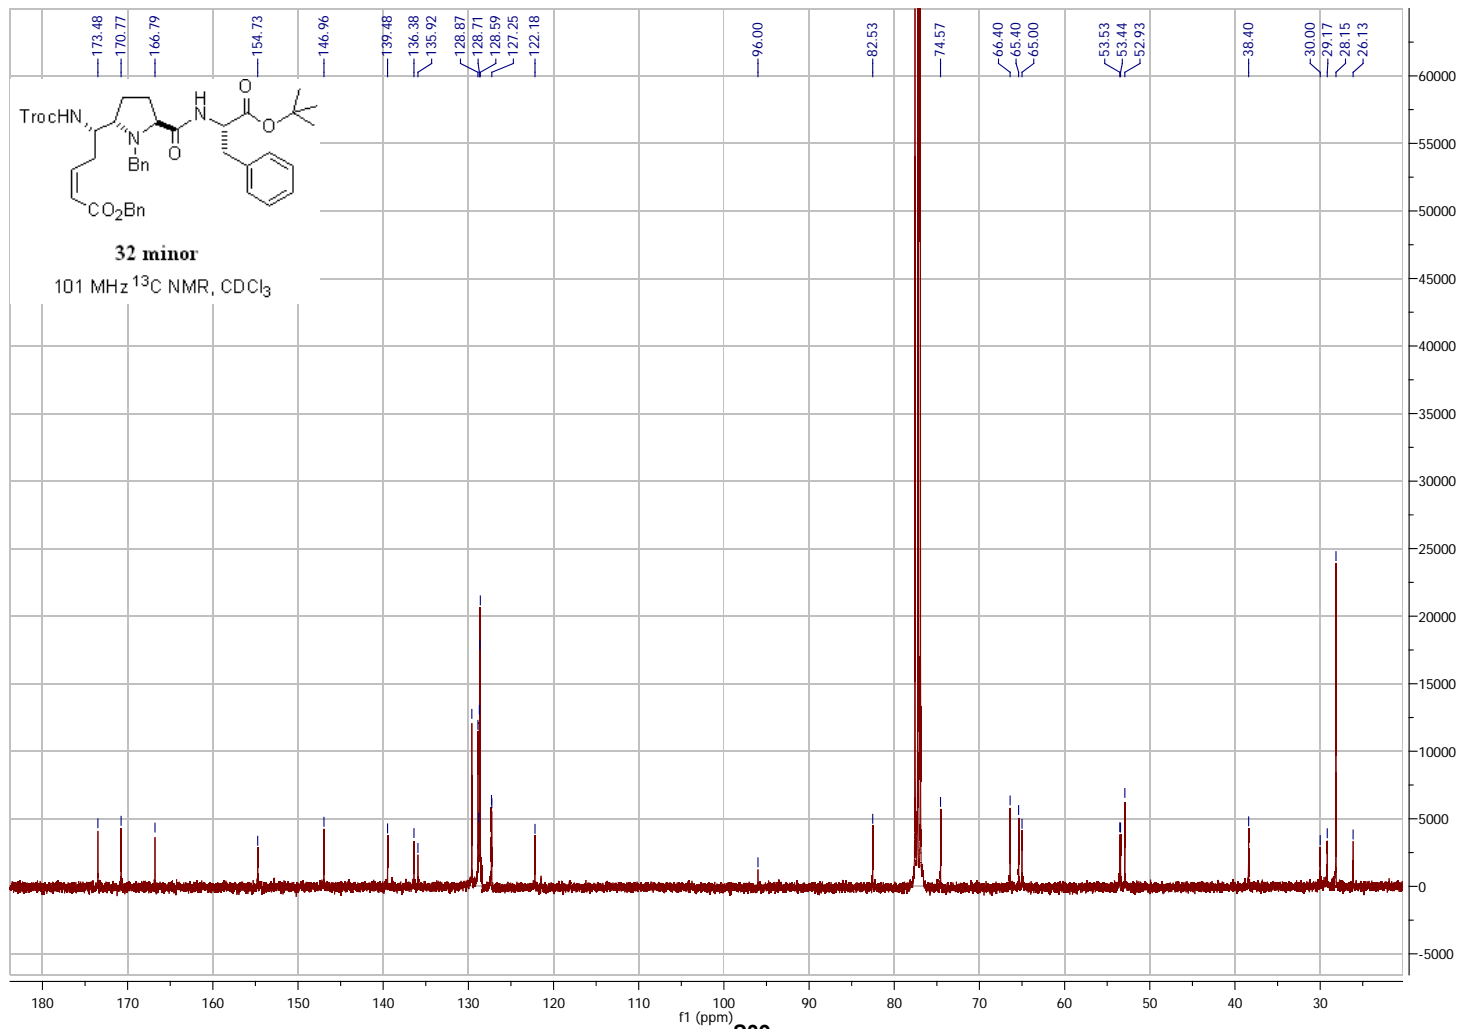

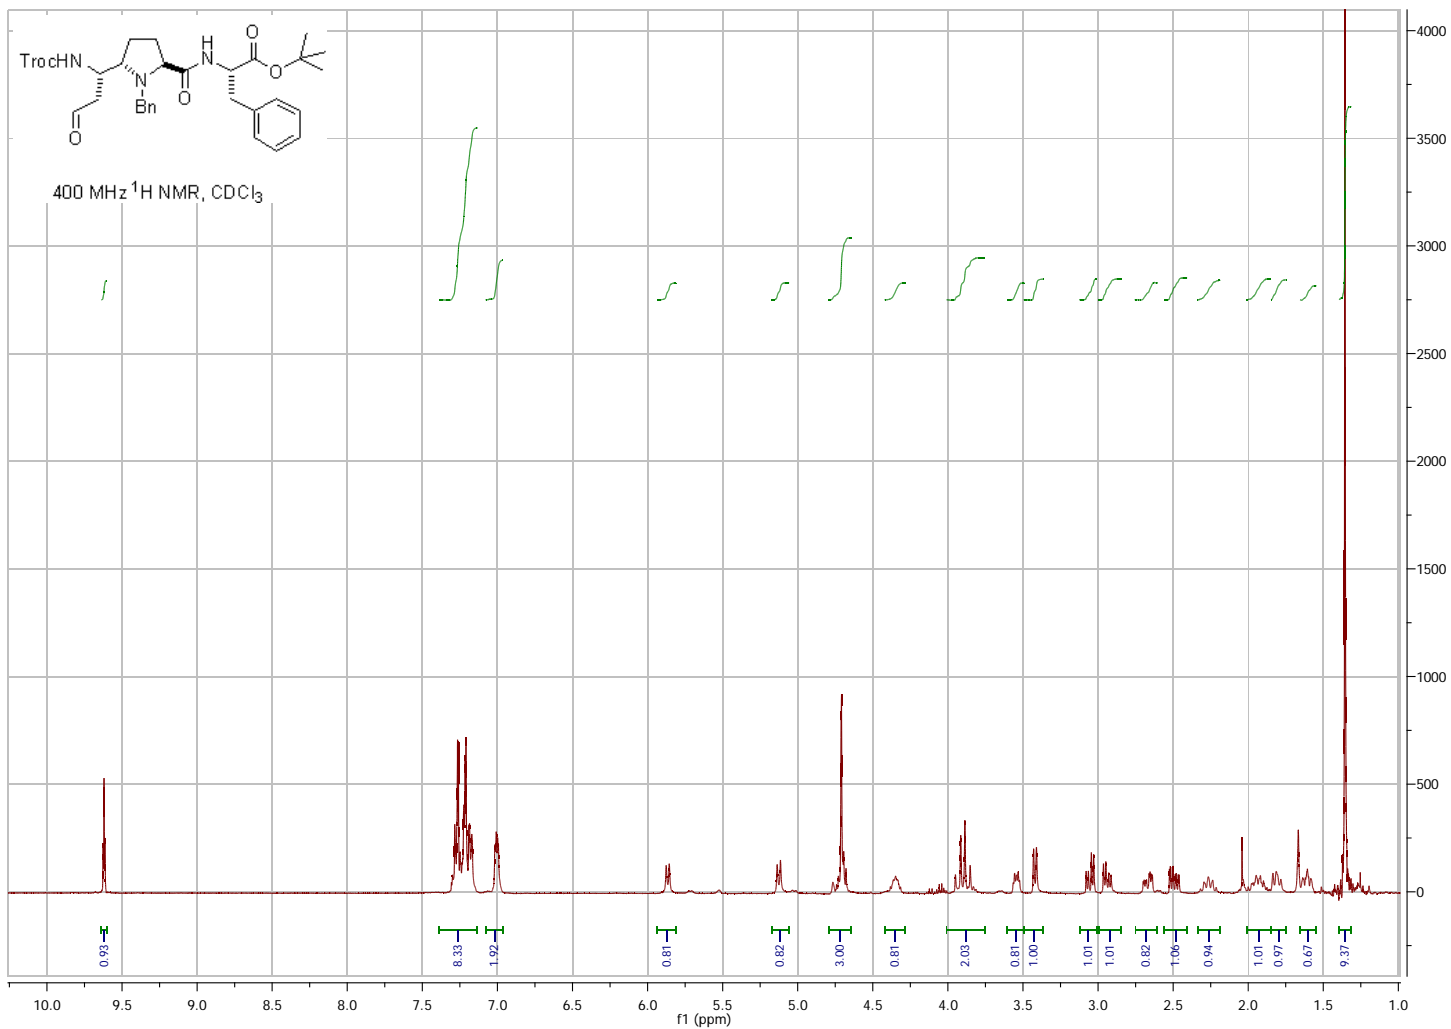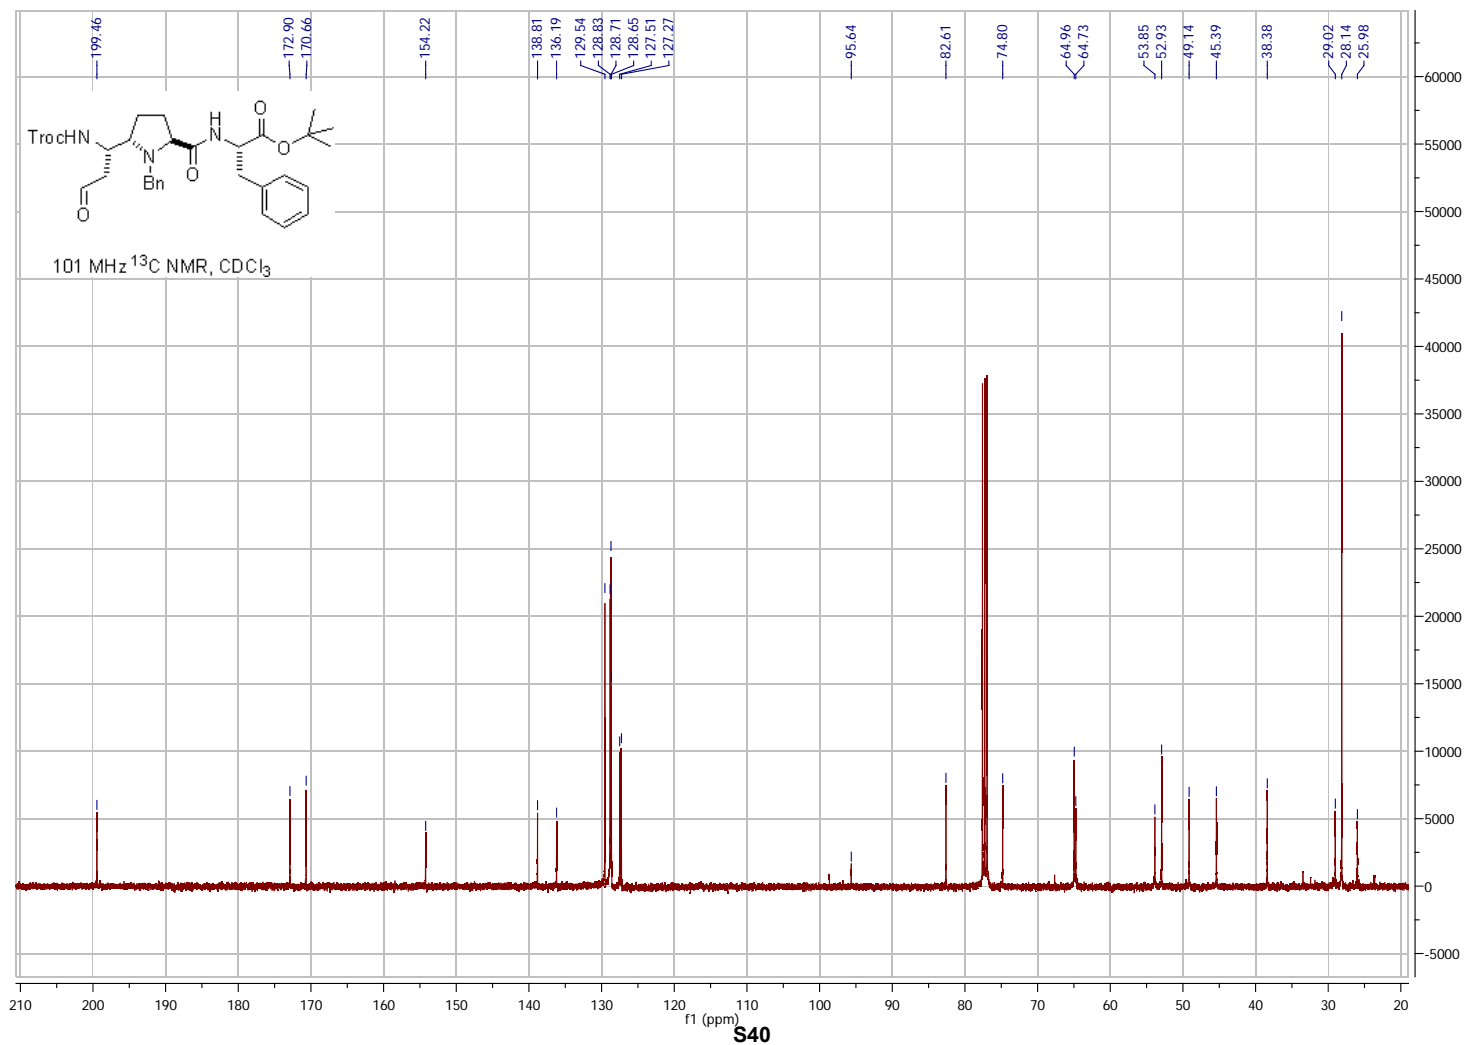

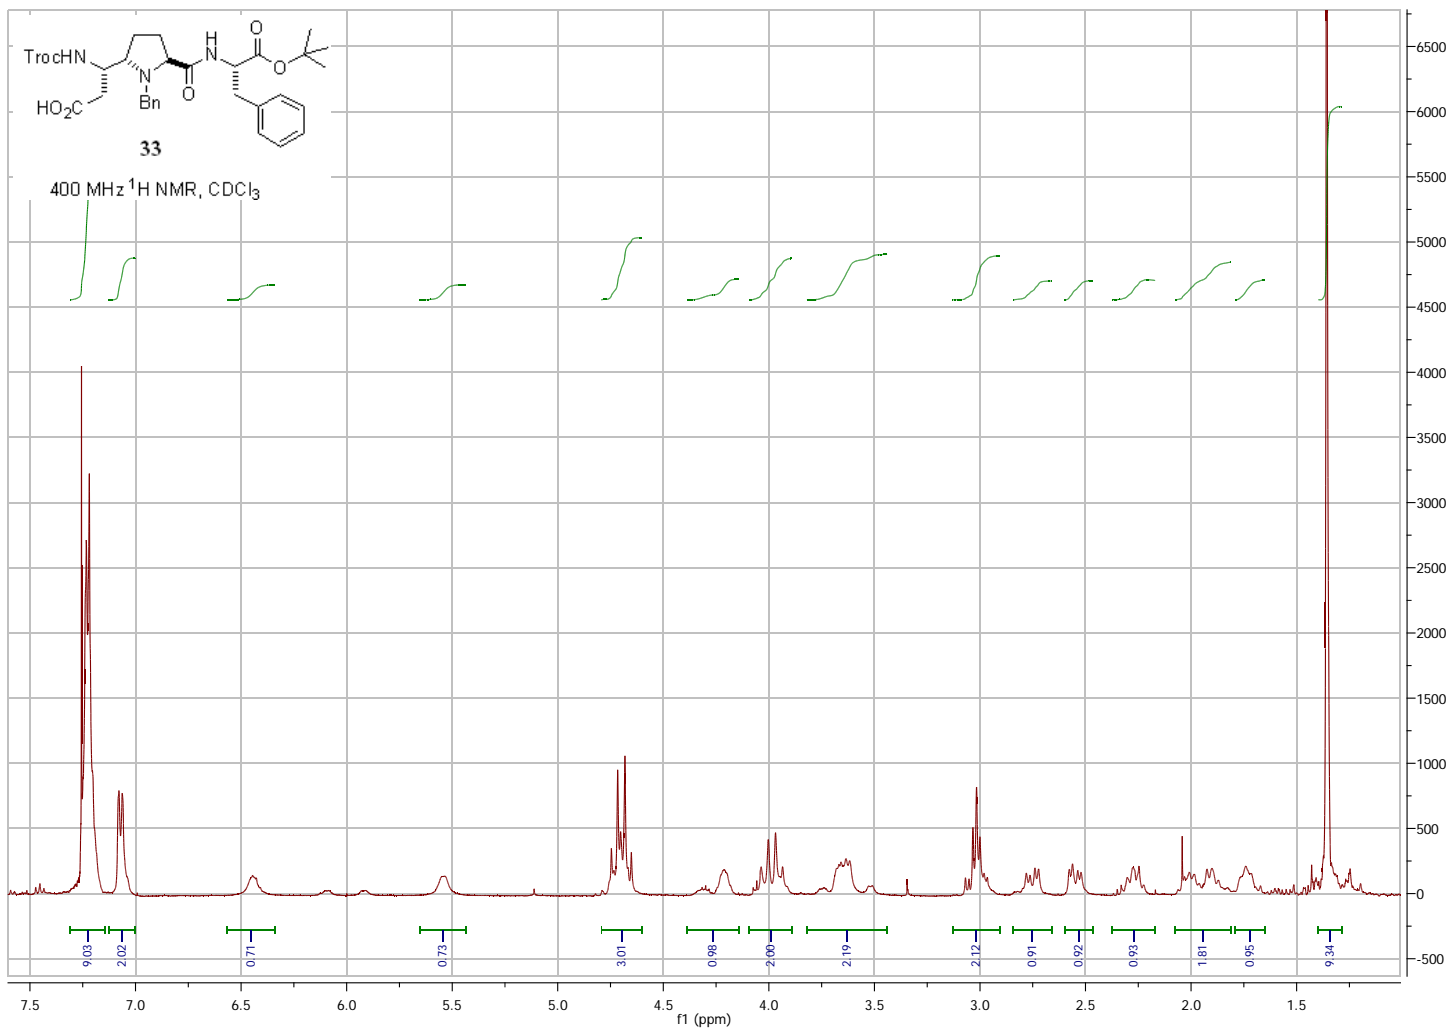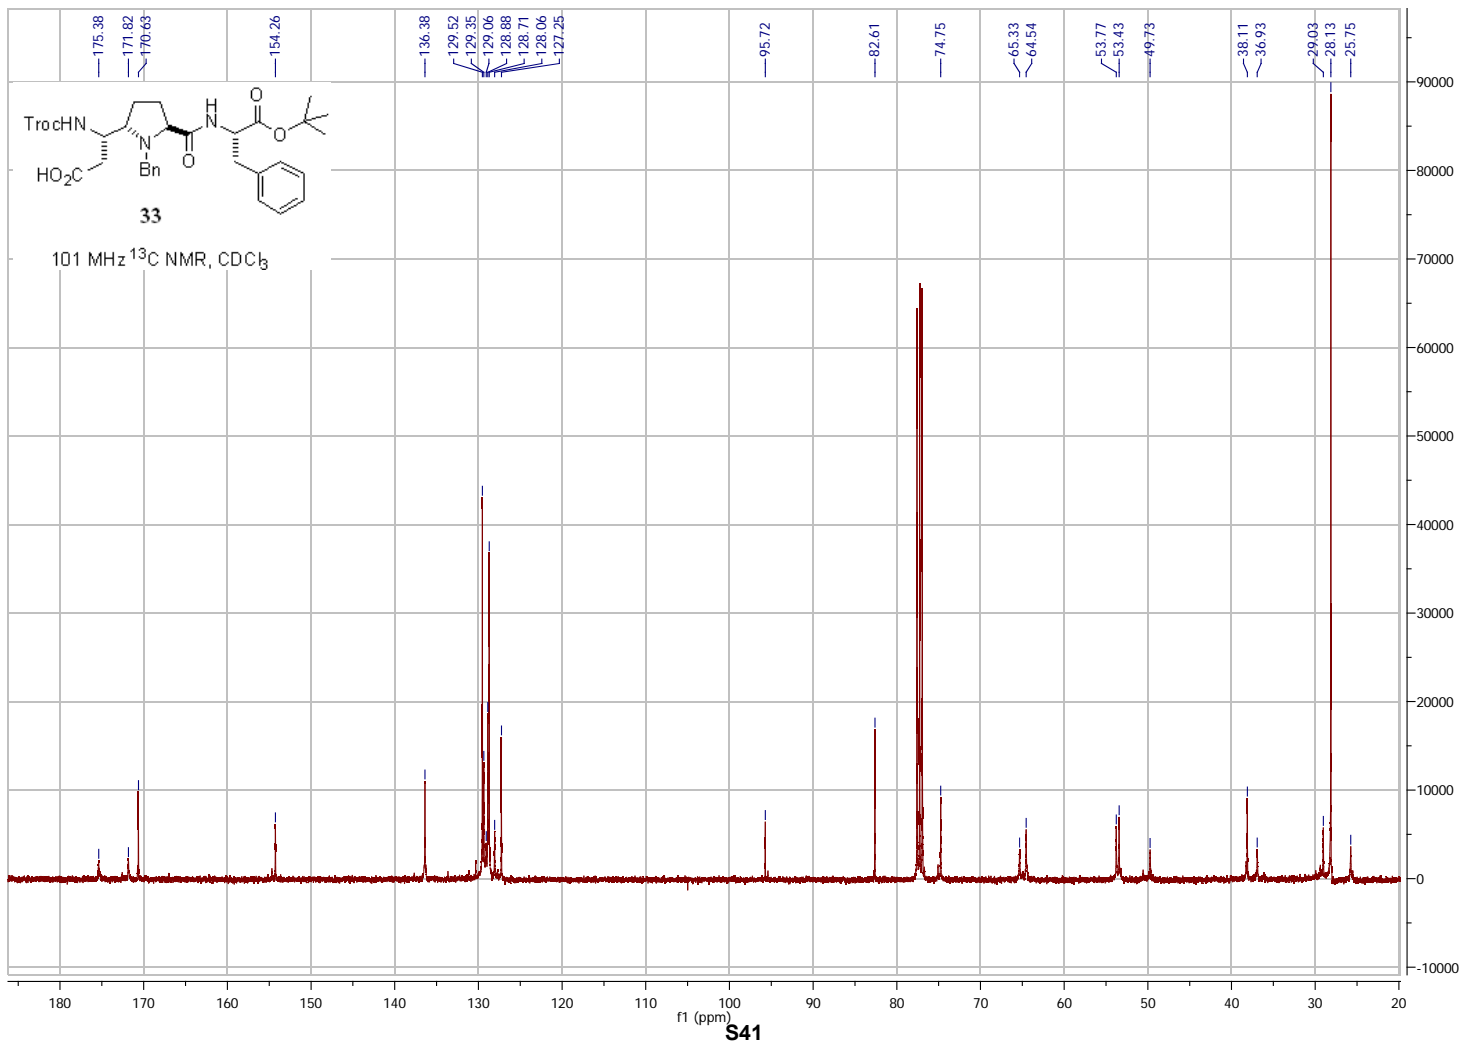

Current Chromatogram(s)

DAD1 C, Sig=220,8 Ref=360,100 (JRD\JRD 2010-06-08 12-52-11\052-0101.D)

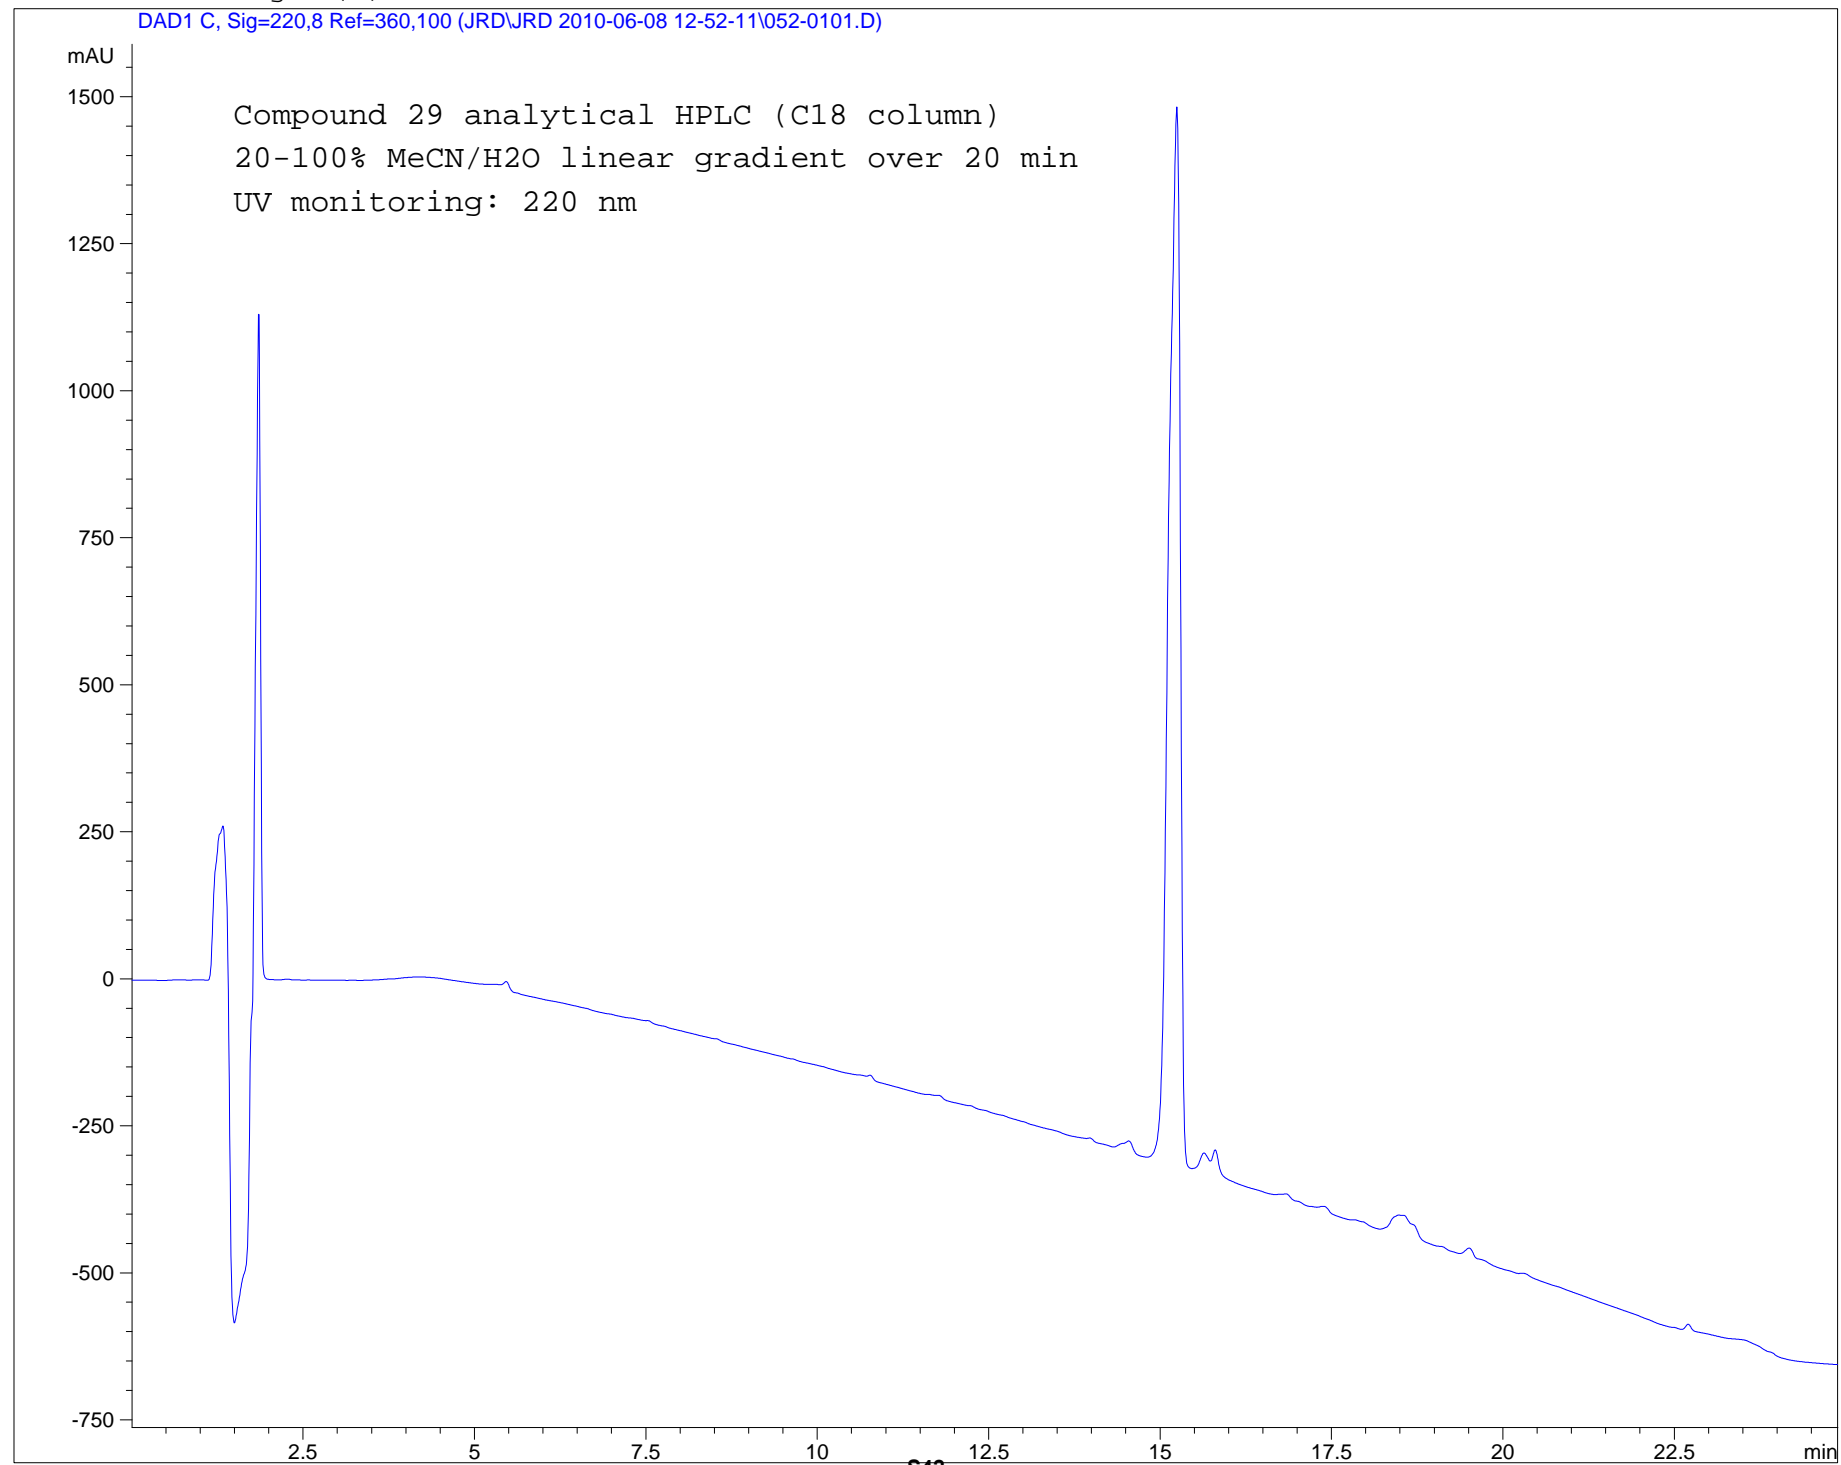

Current Chromatogram(s)

DAD1 C, Sig=220,8 Ref=360,100 (JRD\JRD 2009-11-17 09-43-07\022-0101.D)

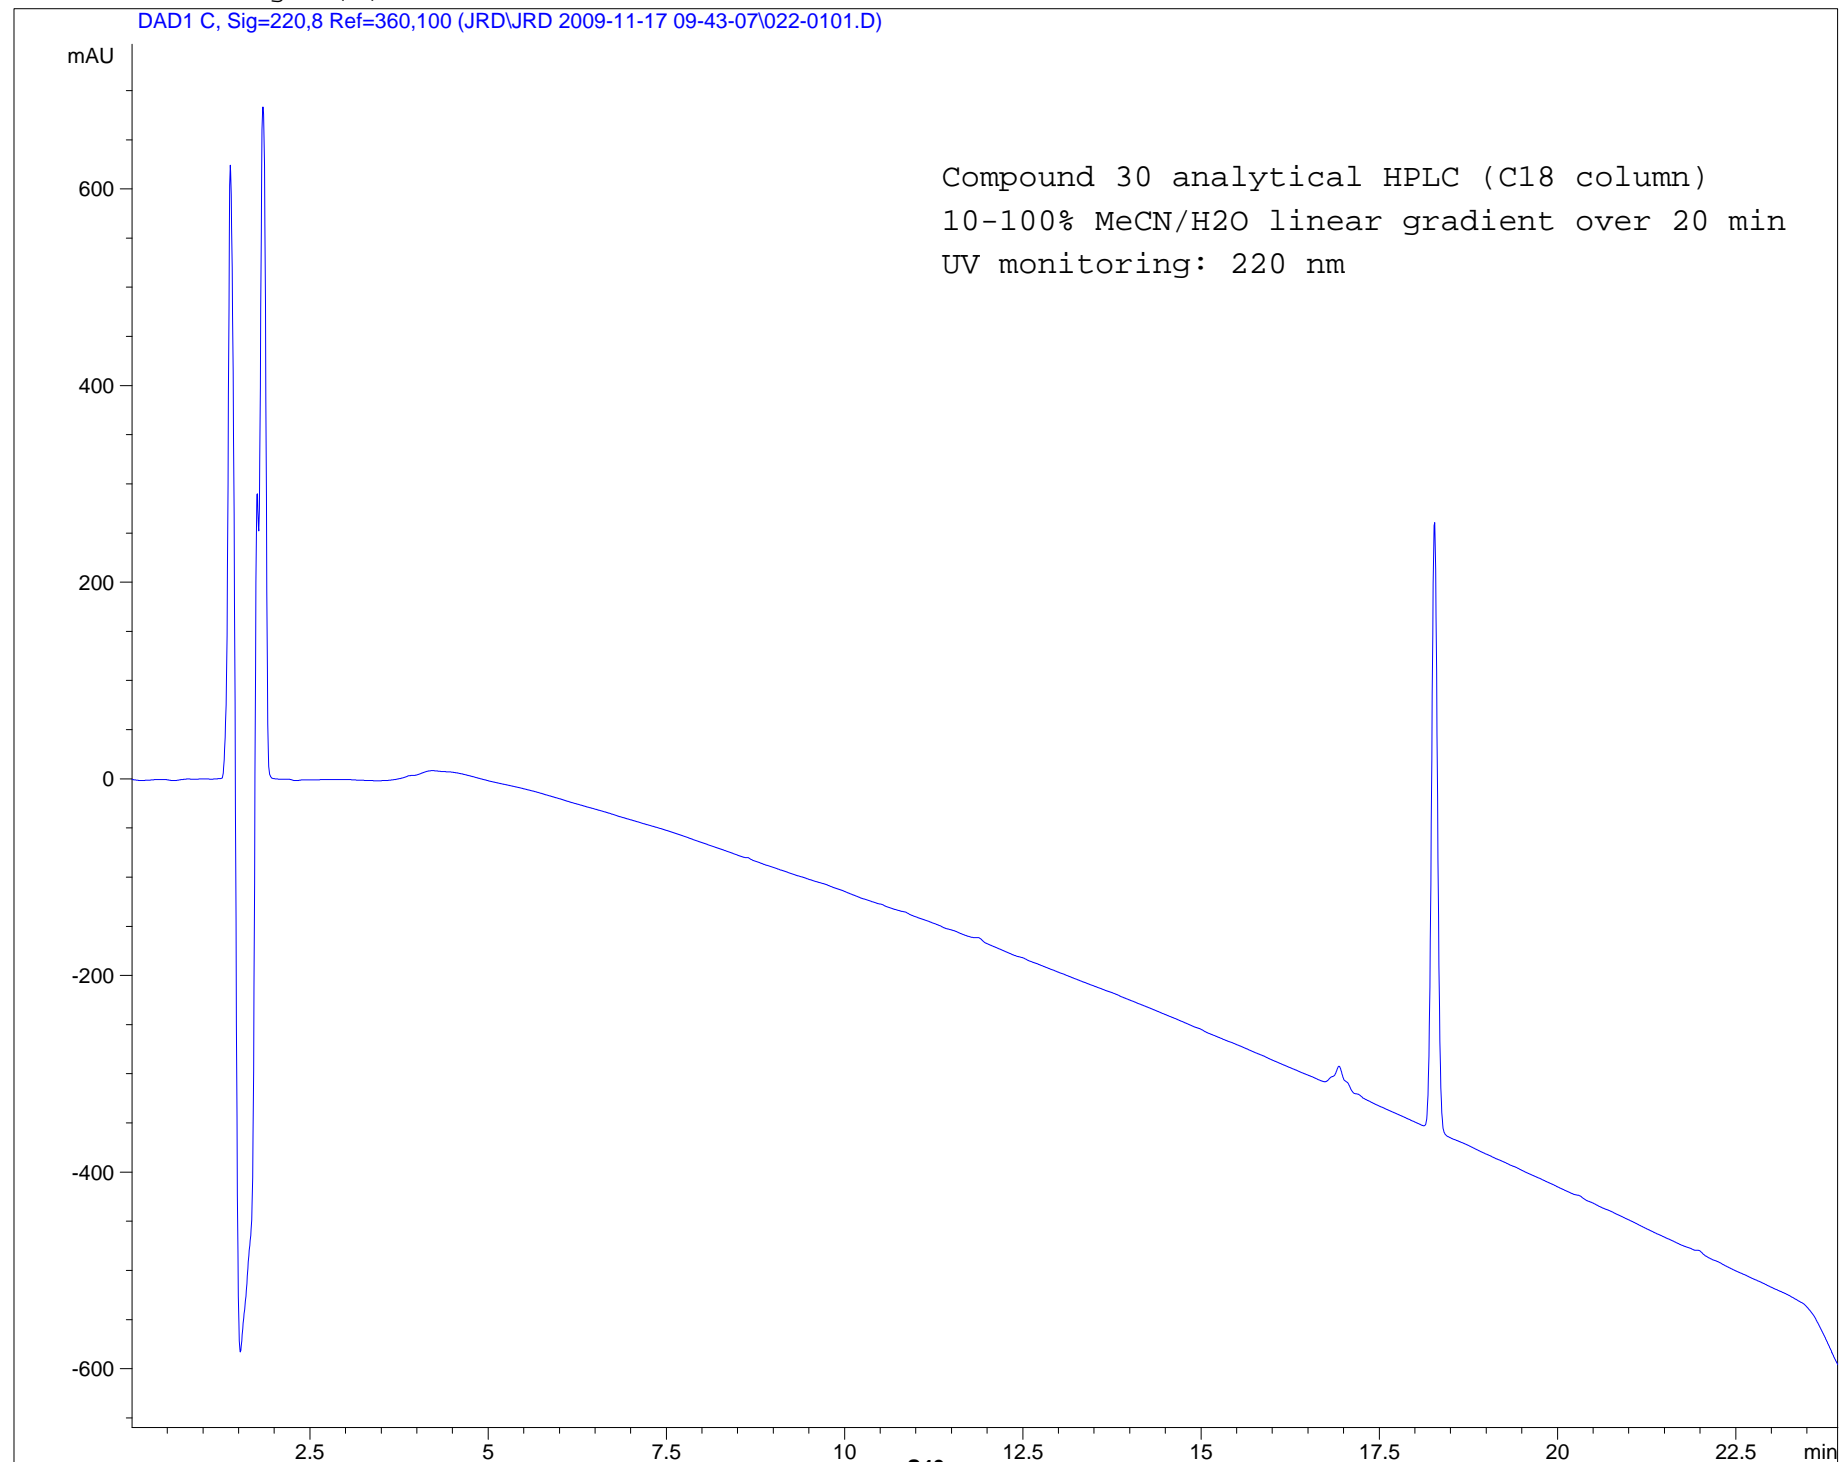

Current Chromatogram(s)

DAD1 C, Sig=220,8 Ref=360,100 (JRD\JRD 2010-06-09 19-44-51\054-0101.D)

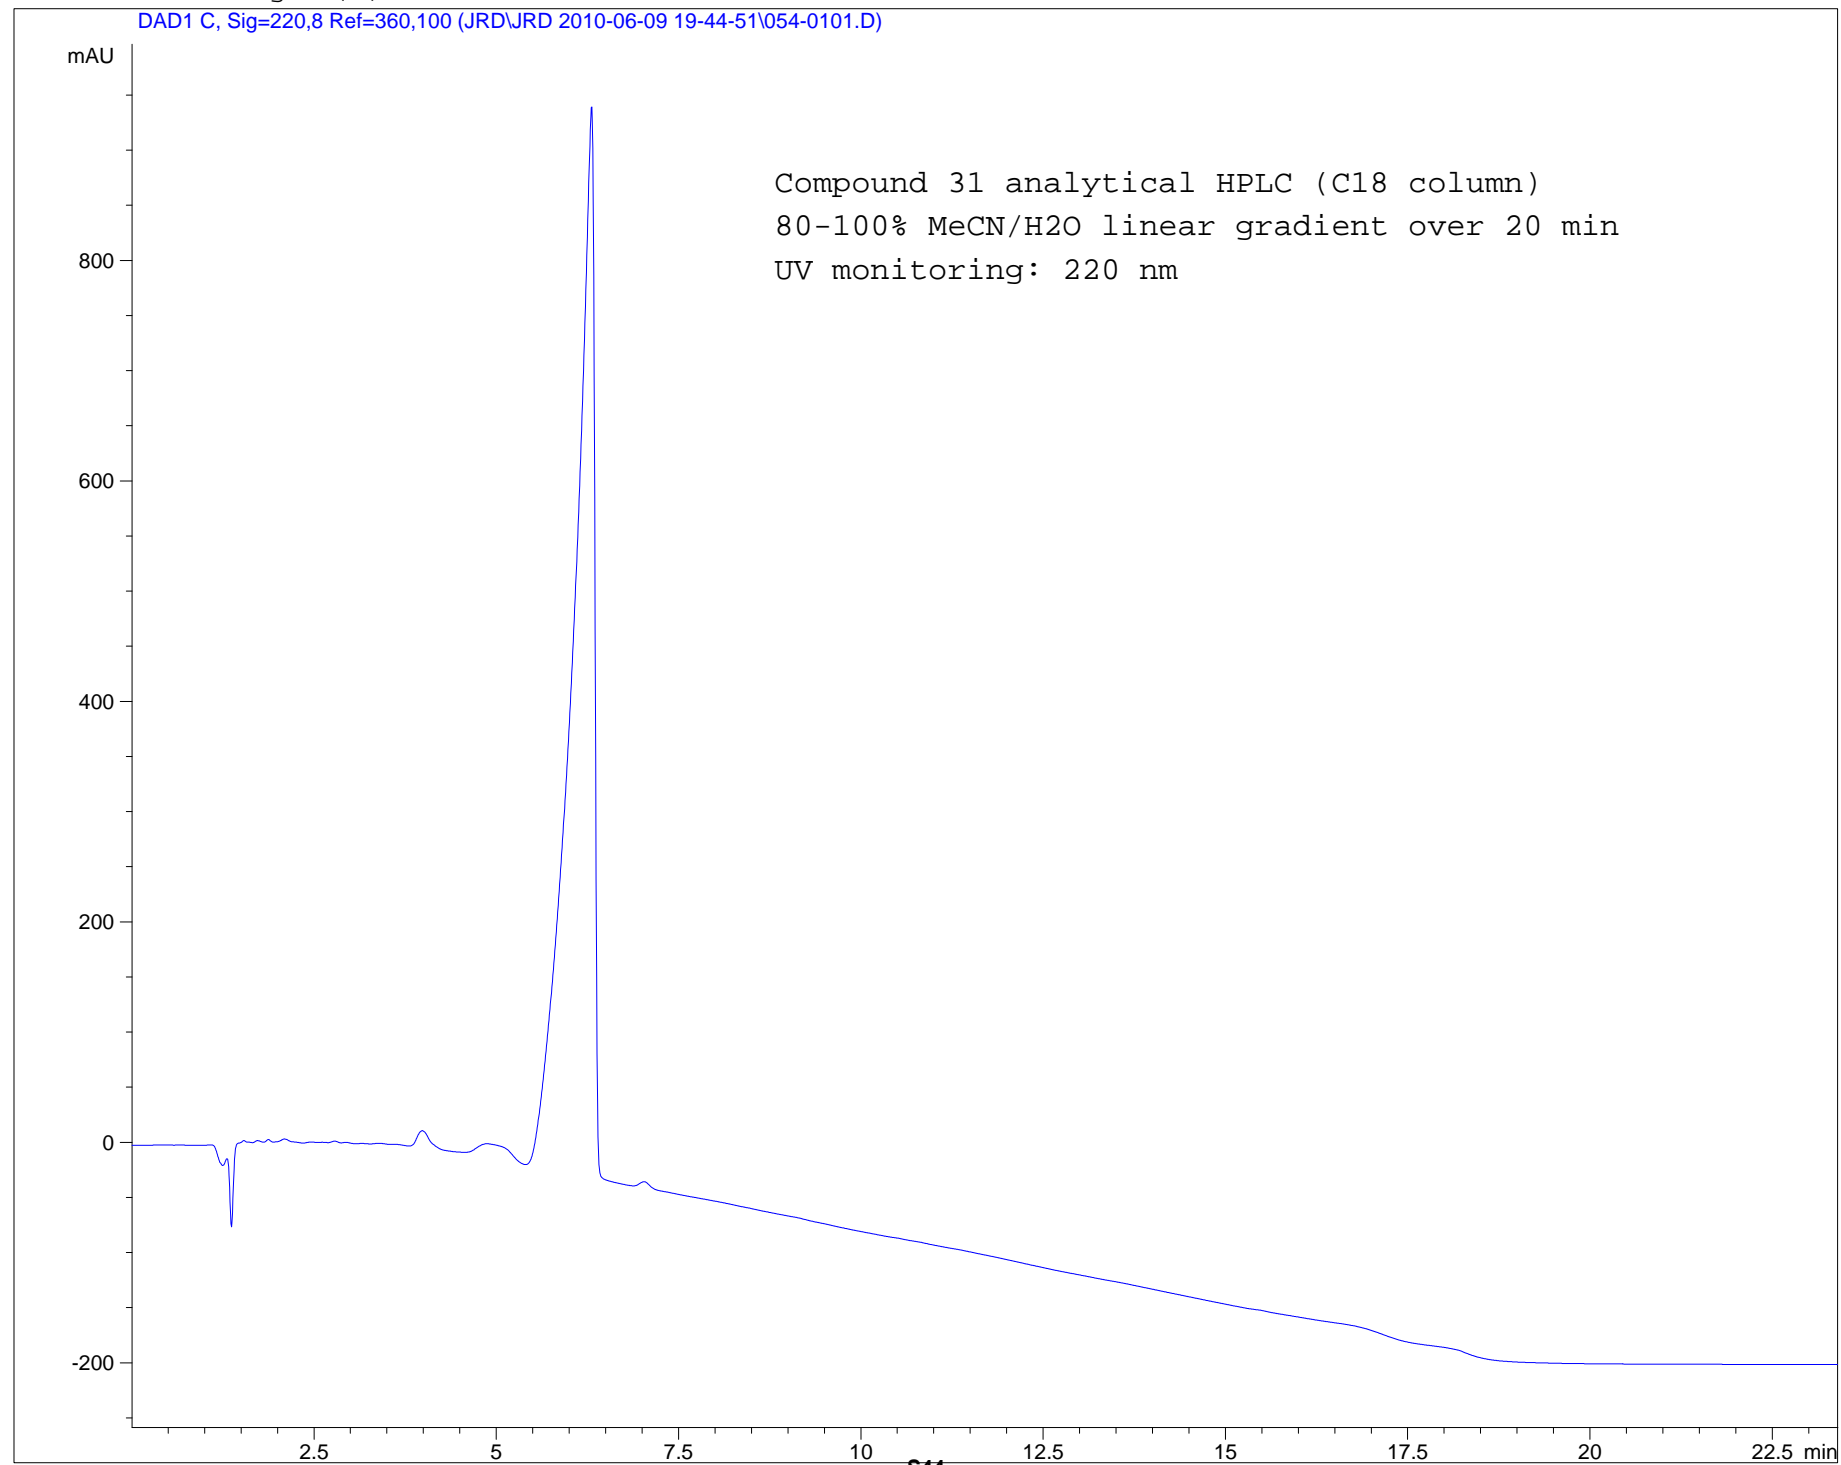



Current Chromatogram(s)

DAD1 C, Sig=220,8 Ref=360,100 (JRD\JRD 2010-06-10 12-02-32\055-0101.D)

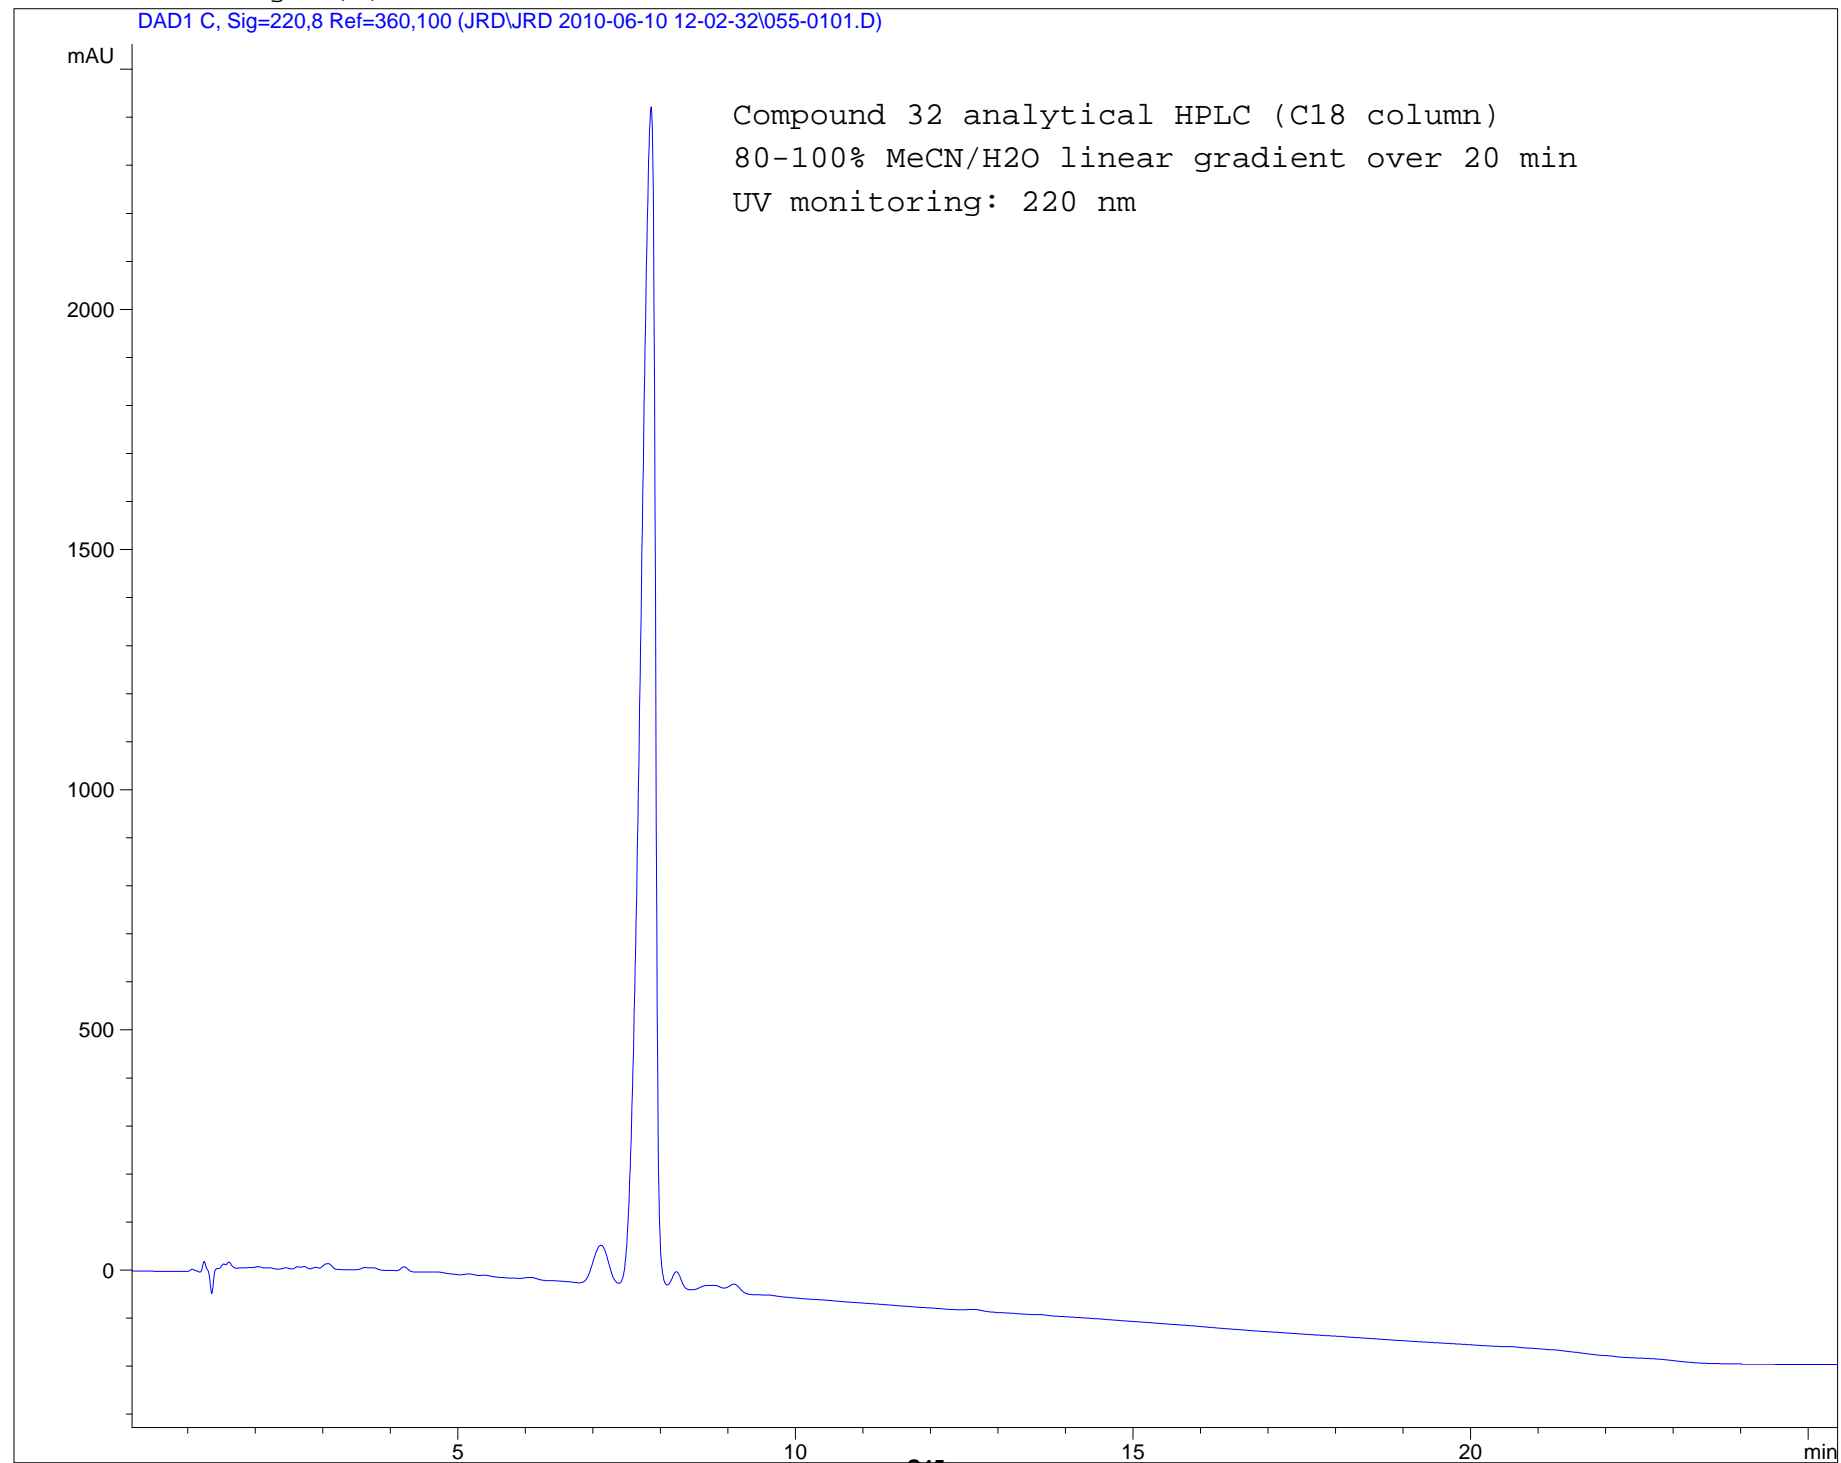

Current Chromatogram(s)

DAD1 C, Sig=220,8 Ref=360,100 (JRD\JRD 2010-06-09 21-42-43\056-0101.D)

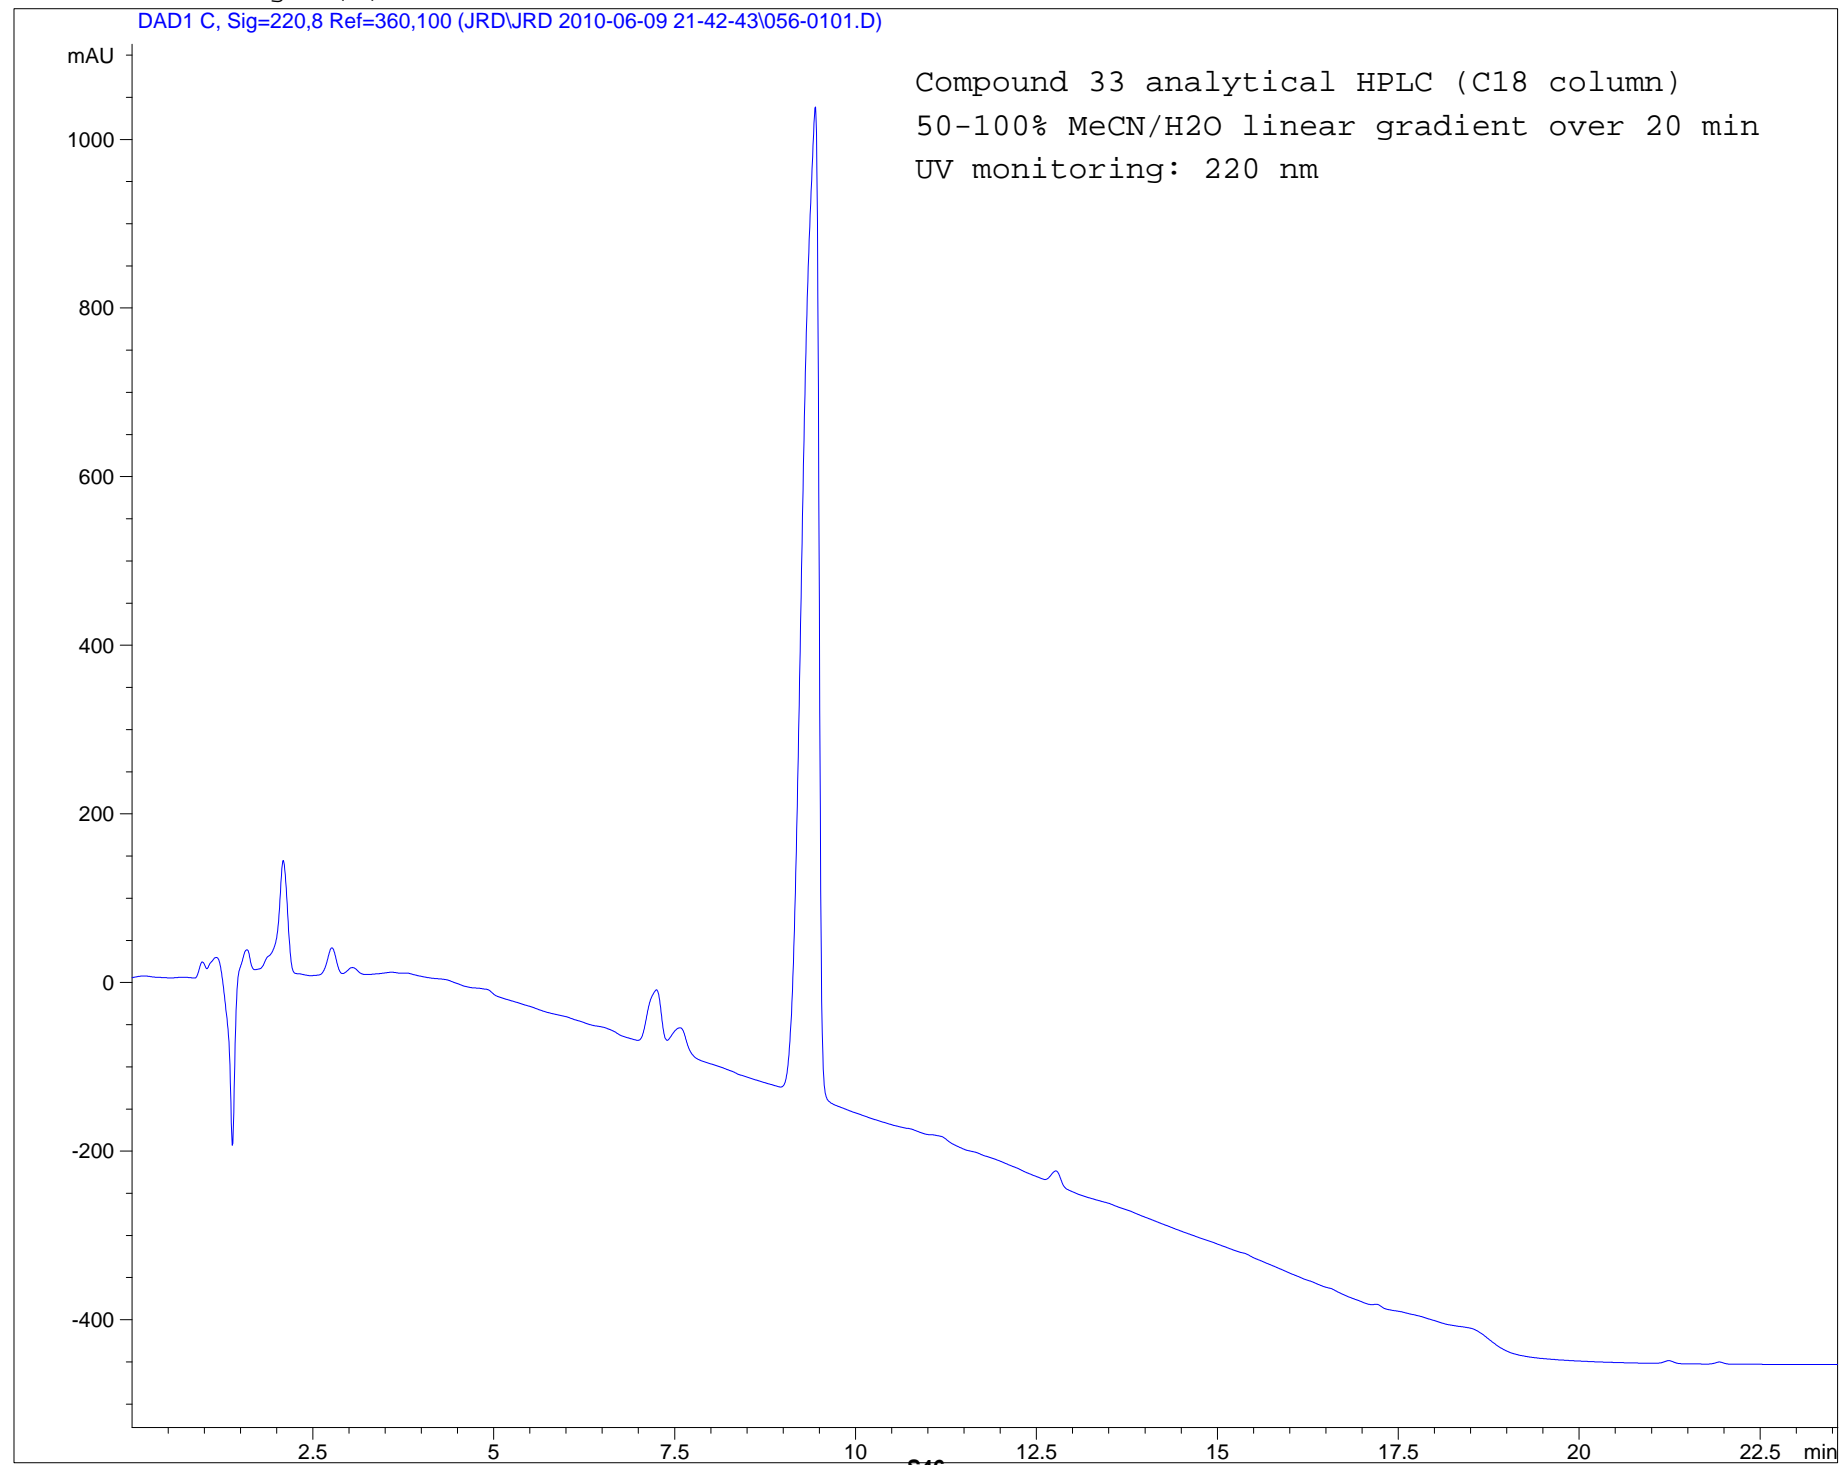

## Procedure for Conformational Searches

Computational modeling was carried out using the Schrodinger 2007 software suite, Maestro version 8.0.308. All structures were prepared with Ligprep (OPLS\_2005 force field) using default settings, with the exception of the following: Epik was used to calculate ionization with pH set to  $7.0 \pm 2.0$ . Conformational searching was carried out with Macromodel (MM3\* force field<sup>1</sup>) using default settings with the exception of the following: solvent was set as CHCl<sub>3</sub>, distance-dependant electrostatics were employed, dielectric constant was set to 2.0, atoms were chosen for substructure flexibility, truncated Newtonian conjugate gradient (TNCG) was used as the minimization method, maximum iterations were set to 5000, and Automatic Setup was used for conformational search parameters. The lowest energy conformers for each compound were selected for measurement of indicated dihedral angles and distances.

---

<sup>1</sup> Allinger, N. L.; Yuh, Y. H.; Lii, J. H. *J. Am. Chem. Soc.* **1989**, *111*, 8551-8566.
